# Supplementary material
Source: PubMed Central journal article supplement (PMC5856650)

# Palladium-Catalyzed C–O Cross-Coupling of Primary Alcohols

Hong Zhang, Paula Ruiz-Castillo, and Stephen L. Buchwald\*

*Department of Chemistry, Massachusetts Institute of Technology  
Cambridge, Massachusetts 02139, United States*

## Supporting Information

### Table of Contents

|                                                                    |            |
|--------------------------------------------------------------------|------------|
| <b>I. General Information .....</b>                                | <b>S2</b>  |
| A) General Reagent Information .....                               | S2         |
| B) General Analytical Information .....                            | S2         |
| <b>II. Experimental Procedures and Characterization Data .....</b> | <b>S3</b>  |
| A) Ligand Synthesis and Characterization .....                     | S3         |
| B) Precatalyst Synthesis and Characterization .....                | S8         |
| C) <i>O</i> -Arylation of Primary Alcohols .....                   | S11        |
| <b>III. Copies of NMR Spectra .....</b>                            | <b>S26</b> |

## I. General Information

### A) General Reagent Information

Tetrahydrofuran (THF), toluene and dichloromethane (CH<sub>2</sub>Cl<sub>2</sub>) were purchased from J.T. Baker in CYCLE-TAINER® solvent-delivery kegs and vigorously purged with argon for 2 h, followed by passing it under argon pressure through two packed columns of neutral alumina. Anhydrous 1,4-dioxane was purchased from Sigma-Aldrich in Sure-Seal™ bottles and used as received. Sodium *tert*-butoxide (NaO*t*-Bu) was purchased from Sigma-Aldrich and stored in a nitrogen-filled glovebox. Small quantities were stored on the bench in a desiccator and used within a week. *t*-BuBrettPhos (**L2**), BrettPhos (**L4**), 2-iodo-2',4',6'-triisopropyl-3,6-dimethoxybiphenyl (**S2**) and 1-adamantylzinc bromide solution (0.5 M in THF) were received as gifts from Sigma-Aldrich, which we are grateful for. RockPhos (**L1**),<sup>1</sup> AdBrettPhos (**L3**),<sup>2</sup> *t*-BuAdBrettPhos (**L6**),<sup>2</sup> 2-aminobiphenylpalladium methanesulfonate dimer (**S5**),<sup>3a</sup> precatalysts **P1–4**<sup>3</sup> were prepared following the literature procedures. All other reagents were purchased from Sigma-Aldrich, Strem Chemicals, Acros Organics, Alfa Aesar, TCI America, Combi Blocks, Oakwood Chemical and Matrix Scientific and used as received. Compounds were purified by flash chromatography with manually loaded Silicycle SiliaFlash® F60 silica gel (40–63 μm, 230–400 mesh, 60 Å pore) or with the aid of a Biotage® Isolera system, employing polypropylene cartridges preloaded with silica gel (Silicycle SiliaFlash® F60 silica gel) or with new Biotage® SNAP cartridges.

### B) General Analytical Information

All compounds were characterized by <sup>1</sup>H and <sup>13</sup>C NMR, as well as <sup>19</sup>F and <sup>31</sup>P NMR where applicable. New compounds were also characterized by IR spectroscopy, melting point (if solid) and elemental analysis or high-resolution mass spectrometry. Copies of <sup>1</sup>H, <sup>13</sup>C, <sup>19</sup>F and <sup>31</sup>P NMR spectra can be found at the end of the Supporting Information. NMR experiments were performed on a Varian 500 MHz, a JEOL 500 MHz, or a Varian 300 MHz spectrometer. All chemical shifts are reported in δ, parts per million (ppm). <sup>1</sup>H and <sup>13</sup>C NMR signals were calibrated with the residual chloroform signal (δ 7.26 ppm and δ 77.23 ppm, respectively). <sup>19</sup>F and <sup>31</sup>P NMR spectra were referenced to an external standard of neat trifluorotoluene (δ –63.72 ppm) and H<sub>3</sub>PO<sub>4</sub> (δ 0.00 ppm), respectively. Both <sup>13</sup>C and <sup>31</sup>P NMR experiments were carried out with decoupling on the <sup>1</sup>H channel. IR spectra were obtained on a Thermo Scientific iD5 ATR Nicolet iS5 FT-IR spectrometer. Elemental analyses were performed by Atlantic Microlab,

Inc., Norcross, GA, USA. Melting points were obtained on a Mel-Temp capillary melting point apparatus. High Resolution Mass Spectra were obtained on a Bruker Daltonics APEXIV 4.7 Tesla Fourier transform ion cyclotron resonance mass spectrometer (FT-ICR-MS). 1,1,2,2-tetrachloroethane and dodecane were used as standards for yields determined by  $^1\text{H}$  NMR analysis and conversions determined by GC analysis, respectively. All isolated yields reported in Tables 2 and 3 of the manuscript represent an average value from two experiments.

## II. Experimental Procedures and Characterization Data

### A) Ligand Synthesis and Characterization

#### General Procedure A:

An oven-dried Schlenk tube, equipped with a magnetic stir bar and fitted with a rubber septum, was charged with 2-iodo-2',4',6'-triisopropyl-3,6-dimethoxybiphenyl (**S2**) (1.00 equiv). The Schlenk tube was evacuated and backfilled with argon (this process was repeated a total of three times). THF was added via syringe and the reaction mixture was cooled to  $-78\text{ }^\circ\text{C}$  in a dry ice/acetone bath. *t*-BuLi (1.7 M in pentane, 2.1 equiv) was added dropwise via syringe. An additional 2–5 mL of THF was used to rinse the reaction vessel. The resulting solution was stirred at  $-78\text{ }^\circ\text{C}$  for 1 h. After 1 h, the septum was replaced with a Teflon stopper under a positive pressure of argon, and pentane from the *t*-BuLi solution was removed under vacuum

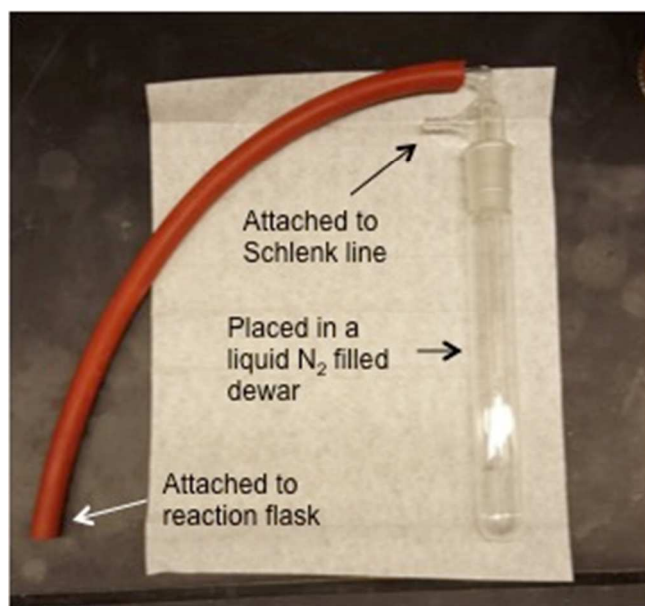

**Figure S1.** External trap for solvent removal.

with the aid of an external trap (Figure S1). When the solvent level reached 2/3 of the initial volume, the Schlenk tube was backfilled with argon and CuCl (1.50 equiv) was added rapidly under a positive pressure of argon. The tube was sealed with a rubber septum and slowly warmed to rt over 30 min. Then, a solution of chlorophosphine (**S1**, **S3** or **S4**) in toluene was transferred via cannula into the reaction mixture (Note: when toluene was added to the crude mixture of chlorophosphine, the insoluble

solids were allowed to settle at the bottom of the flask and the precipitate was not transferred into the reaction flask). An additional 5 mL of toluene was used to rinse the reaction vessel. The rubber septum was replaced with the Teflon stopper under a flow of argon and the reaction vessel was heated to 140 °C in an oil bath. The mixture was vigorously stirred for 24 h, turning from dark grey to a pinkish brown color. The reaction mixture was cooled to rt, diluted with EtOAc, and washed with a mixture of 30% NH<sub>4</sub>OH and brine, until the aqueous layer was no longer blue. The organic layer was dried over MgSO<sub>4</sub>, filtered and concentrated *in vacuo*. The resulting solid was triturated in MeOH, filtered and purified by silica gel chromatography (gradient elution: 100% CH<sub>2</sub>Cl<sub>2</sub> to 50% EtOAc in CH<sub>2</sub>Cl<sub>2</sub>).

a) Synthesis of **L5**:

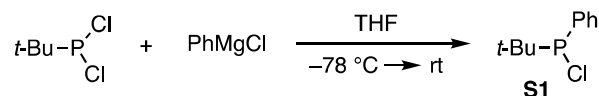

An oven-dried 50 mL round-bottom flask, equipped with a magnetic stir bar and fitted with a rubber septum, was brought into a nitrogen-filled glovebox. *t*-BuPCl<sub>2</sub> (318 mg, 2.00 mmol, 1.00 equiv) was added, and the reaction flask was recapped with the septum, taken outside the glovebox and cooled to -78 °C in a dry ice/acetone bath. A separate oven-dried 25 mL round-bottom flask equipped with a stir bar was evacuated and backfilled with argon (this process was repeated a total of three times). PhMgCl (2.0 M in THF, 1.2 mL, 2.4 mmol, 1.2 equiv) and THF (8.4 mL) were added via syringe. The combined solution was transferred via cannula to the 50-mL reaction flask. The resulting mixture was stirred at -78 °C for 30 min, warmed to rt and stirred for an additional 3 h. An aliquot was taken for <sup>31</sup>P NMR analysis to confirm the completion of the reaction (\*Caution: **S1** is air- and moisture-sensitive). The solvent was removed under vacuum with the aid of an external trap (Figure S1) and the reaction flask was backfilled with argon and stored in the glovebox.

***tert*-butyl(phenyl)(2',4',6'-triisopropyl-3,6-dimethoxy-[1,1'-biphenyl]-2-yl)phosphane (L5):**

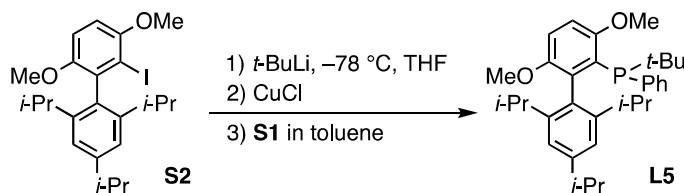

Following General Procedure A, a mixture of **S2** (622 mg, 1.33 mmol, 1.00 equiv), THF (8 mL), *t*-BuLi (1.7 M in pentane, 1.7 mL, 2.8 mmol, 2.1 equiv), CuCl (198 mg, 2.00 mmol, 1.50 equiv), a solution of **S1** in toluene (20 mL) was stirred at 140 °C for 24 h. The crude mixture was purified by silica gel chromatography (gradient elution: 100% CH<sub>2</sub>Cl<sub>2</sub> to 50% EtOAc in CH<sub>2</sub>Cl<sub>2</sub>) to provide a white solid (214 mg, 32% yield). **mp** = 160–162 °C. <sup>1</sup>H NMR (500 MHz, Chloroform-d) δ 7.17–7.13 (m, 5H), 6.99–6.94 (m, 3H), 6.77 (s, 1H), 3.79 (s, 3H), 3.61 (s, 3H), 2.90 (hept, *J* = 6.5 Hz, 1H), 2.58 (hept, *J* = 7.0 Hz, 1H), 2.00 (hept, *J* = 7.0 Hz, 1H), 1.27 (d, *J* = 7.0 Hz, 6H), 1.25 (d, *J* = 7.0 Hz, 3H), 1.08 (d, *J* = 13.5 Hz, 9H), 1.03 (d, *J* = 7.0 Hz, 3H), 0.76 (d, *J* = 6.5 Hz, 3H), 0.19 (d, *J* = 6.5 Hz, 3H). <sup>13</sup>C NMR (126 MHz, Chloroform-d) δ 155.7, 155.7, 152.7, 152.6, 147.0, 146.9, 146.8, 145.4, 145.4, 140.5, 138.7, 138.5, 133.0, 132.8, 132.7, 127.4, 127.4, 126.8, 125.6, 125.3, 120.2, 120.0, 111.9, 108.9, 55.2, 54.5, 34.0, 31.7, 31.5, 31.0, 30.8, 30.7, 25.1, 25.0, 24.2, 24.2, 23.8, 22.0 ppm (the observed complexity is due to C–P coupling). <sup>31</sup>P NMR (203 MHz, Chloroform-d) δ 11.4 ppm. IR (neat, cm<sup>-1</sup>) 2954, 1458, 1422, 1253, 1089, 1047, 1019, 872, 798, 747 711. EA Calcd. for C<sub>33</sub>H<sub>45</sub>O<sub>2</sub>P: C, 78.54; H, 8.99, Found: C, 77.88; H, 8.90.

b) Synthesis of **L7**:

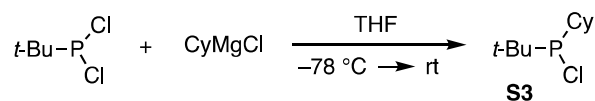

An oven-dried 50 mL round-bottom flask, equipped with a magnetic stir bar and fitted with a rubber septum, was brought into a nitrogen-filled glovebox. *t*-BuPCl<sub>2</sub> (318 mg, 2.00 mmol, 1.00 equiv) was added, and the reaction flask was recapped with the septum, taken outside the glovebox and cooled to –78 °C in a dry ice/acetone bath. A separate oven-dried 25 mL round-bottom flask equipped with a stir bar was evacuated and backfilled with argon (this process was repeated a total of three times). CyMgCl (1.0 M in 2-MeTHF, 2.40 mL, 2.40 mmol, 1.20 equiv) and THF (7.2 mL) were added via syringe. The combined solution was transferred via cannula to the 50-mL reaction flask. The resulting mixture was stirred at –78 °C for 30 min, warmed to rt and stirred for an additional 3 h. An aliquot was taken for <sup>31</sup>P NMR analysis to confirm the completion of the reaction (\*Caution: **S3** is air- and moisture-sensitive). The solvent was removed under vacuum with the aid of an external trap (Figure S1) and the reaction flask was backfilled with argon and stored in the glovebox.

***tert*-butyl(cyclohexyl)(2',4',6'-triisopropyl-3,6-dimethoxy-[1,1'-biphenyl]-2-yl)phosphane (L7):**

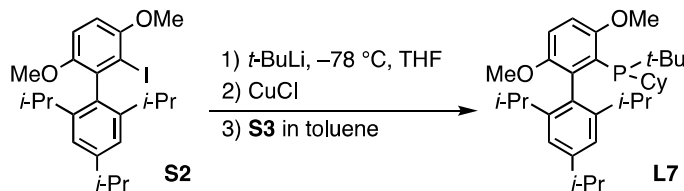

Following General Procedure A, a mixture of **S2** (622 mg, 1.33 mmol, 1.00 equiv), THF (8 mL), *t*-BuLi (1.7 M in pentane, 1.7 mL, 2.8 mmol, 2.1 equiv), CuCl (198 mg, 2.00 mmol, 1.50 equiv), and a solution of **S3** in toluene (20 mL) was stirred at 140 °C for 24 h. The crude mixture was purified by silica gel chromatography (gradient elution: 100% CH<sub>2</sub>Cl<sub>2</sub> to 50% EtOAc in CH<sub>2</sub>Cl<sub>2</sub>) to provide a white solid (340 mg, 50% yield). **mp** = 129–131 °C. <sup>1</sup>H NMR (500 MHz, Chloroform-*d*) δ 6.96 (d, *J* = 2.0 Hz, 2H), 6.84 (d, *J* = 8.8 Hz, 1H), 6.77 (d, *J* = 8.9 Hz, 1H), 3.81 (s, 3H), 3.56 (s, 3H), 2.93 (hept, *J* = 7.0 Hz, 1H), 2.48–2.43 (m, 2H), 2.43–2.41 (m, 1H), 1.71–1.64 (m, 4H), 1.31 (dd, *J* = 6.9, 1.5 Hz, 6H), 1.28–1.27 (m, 1H), 1.24 (d, *J* = 6.8 Hz, 3H), 1.21–1.19 (m, 1H), 1.19–1.10 (m, 6H), 1.03 (d, *J* = 11.7 Hz, 9H), 0.96 (d, *J* = 6.7 Hz, 3H), 0.93–0.92 (m, 1H), 0.89 (d, *J* = 6.7 Hz, 3H). <sup>13</sup>C NMR (126 MHz, Chloroform-*d*) δ 156.2, 152.6, 152.5, 147.1, 146.3, 146.2, 140.0, 139.7, 132.8, 132.8, 127.5, 127.3, 120.3, 110.8, 108.0, 54.8, 54.7, 34.1, 34.0, 33.8, 33.7, 31.9, 31.8, 30.7, 30.7, 29.7, 29.6, 29.5, 28.3, 28.2, 27.3, 27.2, 26.8, 25.6, 25.3, 24.4, 24.2, 24.0, 23.7 ppm (the observed complexity is due to C–P coupling). <sup>31</sup>P NMR (203 MHz, Chloroform-*d*) δ 10.1 ppm. IR (neat, cm<sup>-1</sup>) 2954, 1458, 1422, 1253, 1089, 1047, 1019, 872, 798, 760, 747. EA Calcd. for C<sub>33</sub>H<sub>51</sub>O<sub>2</sub>P: C, 77.61; H, 10.07, Found: C, 77.43; H, 10.06.

c) Synthesis of **L8**:

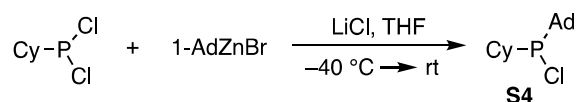

An oven-dried 250 mL three-neck round-bottom flask, equipped with a magnetic stir bar and fitted with a glass stopper and two rubber septa, was evacuated and backfilled with argon (this process was repeated a total of three times). CyPCl<sub>2</sub> (1.25 g, 6.76 mmol, 1.00 equiv, stored in a nitrogen-filled glovebox) was added via syringe and the reaction flask was cooled to –40 °C in a dry ice/acetonitrile bath. A separate oven-dried 100 mL round-bottom flask equipped with a stir bar was evacuated and backfilled with argon (this process was repeated a total of three times). A

solution of AdZnBr (0.5 M in THF, 14.9 mL, 7.43 mmol, 1.10 equiv) and a solution of LiCl (0.5 M in THF, 14.9 mL, 7.43 mmol, 1.10 equiv) were added via syringe. The combined solution was transferred via cannula to the three-neck reaction flask. The resulting mixture was stirred at  $-40$  °C for 30 min, warmed to rt and stirred for an additional 3 h. An aliquot was taken for  $^{31}\text{P}$  NMR analysis to confirm the completion of the reaction (\*Caution: **S4** is air- and moisture-sensitive). The solvent was removed under vacuum with the aid of an external trap (Figure S1) and the reaction flask was backfilled with argon and stored in the glovebox.

**((3*r*)-adamantan-1-yl)(cyclohexyl)(2',4',6'-triisopropyl-3,6-dimethoxy-[1,1'-biphenyl]-2-yl)phosphane (**L8**):**

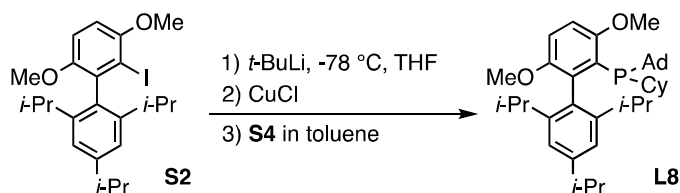

Following General Procedure A, a mixture of **S2** (2.63 g, 5.63 mmol, 1.00 equiv), THF (30 mL), *t*-BuLi (1.7 M in pentane, 7.0 mL, 11.8 mmol, 2.1 equiv), CuCl (836 mg, 8.45 mmol, 1.5 equiv), and a solution of **S4** in toluene (75 mL) was stirred at  $140$  °C for 24 h. The crude mixture was purified by silica gel chromatography (gradient elution: 100%  $\text{CH}_2\text{Cl}_2$  to 50% EtOAc in  $\text{CH}_2\text{Cl}_2$ ) to provide a white solid (2.33 g, 70% yield). **mp** =  $224$ – $226$  °C.  $^1\text{H}$  NMR (500 MHz, Chloroform-*d*)  $\delta$  6.96 (s, 2H), 6.85 (d,  $J$  = 8.7 Hz, 1H), 6.78 (d,  $J$  = 8.8 Hz, 1H), 3.83 (s, 3H), 3.55 (s, 3H), 2.94 (p,  $J$  = 6.9 Hz, 1H), 2.52 (ddq,  $J$  = 8.9, 5.8, 3.1 Hz, 1H), 2.43 (dq,  $J$  = 20.3, 6.8 Hz, 2H), 1.91–1.76 (m, 6H), 1.73–1.55 (m, 13H), 1.31 (dt,  $J$  = 7.1, 1.4 Hz, 6H), 1.24 (d,  $J$  = 6.7 Hz, 3H), 1.21 (d,  $J$  = 6.6 Hz, 3H), 1.20–1.06 (m, 4H), 0.96 (d,  $J$  = 6.6 Hz, 3H), 0.88 (d,  $J$  = 6.8 Hz, 3H) ppm.  $^{13}\text{C}$  NMR (126 MHz, Chloroform-*d*)  $\delta$  156.2, 152.6, 152.6, 147.0, 146.4, 146.1, 140.2, 139.9, 132.9, 132.8, 126.7, 126.4, 120.3, 120.2, 110.7, 107.9, 54.9, 54.7, 42.5, 42.4, 37.2, 34.8, 34.5, 34.0, 33.2, 33.0, 31.8, 31.6, 30.7, 30.6, 30.0, 29.8, 29.6, 28.3, 28.3, 27.3, 27.2, 26.9, 25.5, 25.3, 24.4, 24.3, 24.0, 23.8 ppm (the observed complexity is due to C–P coupling).  $^{31}\text{P}$  NMR (203 MHz, Chloroform-*d*)  $\delta$  12.4 ppm. **IR** (neat,  $\text{cm}^{-1}$ ) 2899, 1582, 1458, 1421, 1302, 1249, 1169, 1086, 1043, 1017, 873, 798, 760, 713. **HRMS** Calcd. for  $\text{C}_{39}\text{H}_{57}\text{O}_2\text{P}$ : 588.41, Found:  $[\text{M}+\text{H}] = 589.41$ .

## B) Precatalyst Synthesis and Characterization

All precatalysts were synthesized according to a modified literature procedure.<sup>3b</sup>

### General Procedure B:

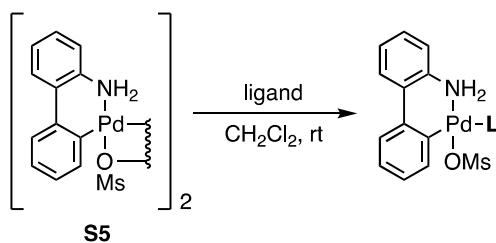

A 25 mL screw-top oven-dried test tube (Fisher Scientific 20 × 125 mm tubes, Cat. No. 1495937A) equipped with a stir bar and sealed with a screw cap (Kimble Chase Open Top S/T Closure, Cat. No. 73804-18400) and a Teflon septum (Thermo Scientific PTFE: 0.010" silicone: 0.090", Cat. No. B7995-18) was charged with 2-aminobiphenylpalladium methanesulfonate dimer (**S5**, 0.45 equiv) and ligand (1.00 equiv). The reaction tube was recapped. The septum was pierced with a needle attached to a Schlenk line, and the tube was evacuated and backfilled with argon (this process was repeated a total of three times). CH<sub>2</sub>Cl<sub>2</sub> was added via syringe. The slurry mixture became a colored homogeneous solution within 30 min and was stirred at rt overnight. The crude mixture was concentrated *in vacuo* and triturated with diethyl ether with the aid of sonication until a free-flowing powder resulted. The solid was isolated by filtration and dried under high vacuum.

### L5-OMs precatalyst (**P5**):

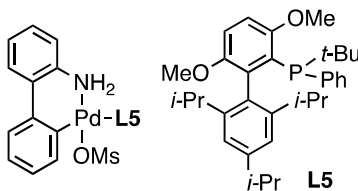

Following General Procedure B, a mixture of **S5** (33 mg, 0.045 mmol, 0.45 equiv), **L5** (50 mg, 0.010 mmol, 1.0 equiv), CH<sub>2</sub>Cl<sub>2</sub> (3.0 mL) was stirred at rt overnight. The reaction mixture became a light brown homogeneous solution. The crude mixture was purified by trituration with diethyl ether to provide an off-white solid (52 mg, 60%). <sup>1</sup>H NMR (500 MHz, Chloroform-d) δ 7.51 (t, *J* = 7.5 Hz, 1H), 7.39–7.35 (m, 4H), 7.18–7.13 (m, 3H), 7.12–7.00 (m, 5H), 6.83–6.76 (m, 1H), 6.70 (td, *J* = 7.5 Hz, 2.0 Hz, 1H), 5.88 (dd, *J* = 7.5 Hz, 5.0 Hz, 1H), 5.74 (dd, *J* = 10.0 Hz, 4.0 Hz, 1H), 3.50 (s, 3H), 3.48 (s, 3H), 3.31 (heptet, *J* = 7.0 Hz, 1H), 2.69 (heptet, *J* = 7.0



Hz, 1H), 2.47 (heptet,  $J = 7.0$  Hz, 1H), 2.36 (s, 3H), 1.54 (d,  $J = 7.0$  Hz, 3H), 1.51 (d,  $J = 7.0$  Hz, 3H), 1.46 (d,  $J = 7.0$  Hz, 3H), 1.05 (d,  $J = 17$  Hz, 9H), 0.99 (d,  $J = 7.0$  Hz, 3H), 0.97 (d,  $J = 7.0$  Hz, 3H), 0.92 (d,  $J = 7.0$  Hz, 3H).  $^{13}\text{C}$  NMR (126 MHz, Chloroform-d)  $\delta$  157.1, 155.9, 154.3, 154.0, 151.9, 151.8, 145.1, 140.4, 139.3, 136.3, 136.0, 135.9, 135.5, 135.5, 130.6, 128.5, 128.4, 128.1, 127.3, 126.8, 126.1, 125.9, 125.2, 122.4, 120.5, 118.5, 118.5, 116.0, 115.9, 113.3, 113.2, 55.3, 39.2, 37.3, 37.1, 34.4, 33.0, 32.0, 31.9, 31.5, 26.7, 24.9, 24.8, 24.7, 24.6, 24.6 ppm (the observed complexity is due to C–P coupling).  $^{31}\text{P}$  NMR (203 MHz, Chloroform-d)  $\delta$  52.5 ppm. IR (neat,  $\text{cm}^{-1}$ ) 1460, 1426, 1221, 1181, 1034, 1009, 890, 825, 756, 746.

### L6-OMs precatalyst (P6):

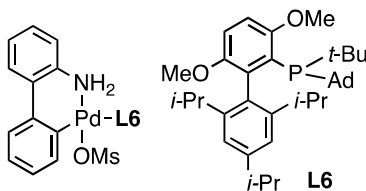

Following General Procedure B, a mixture of **S5** (30 mg, 0.040 mmol, 0.45 equiv), **L6** (50 mg, 0.089 mmol, 1.0 equiv),  $\text{CH}_2\text{Cl}_2$  (3.0 mL) was stirred at rt overnight. The reaction mixture became a dark red homogeneous solution. The crude mixture was purified by trituration with diethyl ether to provide a dark red solid (50 mg, 60%).  $^1\text{H}$  NMR (500 MHz, Chloroform-d) complex spectrum – see attached.  $^{13}\text{C}$  NMR (126 MHz, Chloroform-d)  $\delta$  150.5, 147.7, 139.9, 126.7, 126.3, 125.7, 123.2, 121.5, 121.4, 120.1, 120.0, 119.0, 111.1, 57.3, 55.2, 42.2, 41.6, 39.7, 39.6, 37.1, 36.9, 36.0, 35.5, 34.2, 34.2, 31.4, 31.3, 29.8, 29.2, 28.7, 28.2, 28.1, 25.9, 24.9, 24.7, 24.0, 24.0, 23.3, 23.2, 22.4, 14.2 ppm (the observed complexity is due to C–P coupling).  $^{31}\text{P}$  NMR (203 MHz, Chloroform-d)  $\delta$  82.7, 42.0 ppm. IR (neat,  $\text{cm}^{-1}$ ) 1461, 1420, 1253, 1174, 1146, 1037, 1008, 887, 806, 754, 733.

### L7-OMs precatalyst (P7):

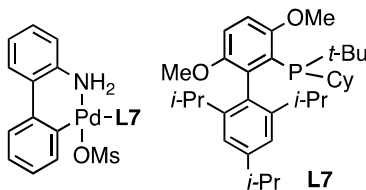

Following General Procedure B, a mixture of **S5** (33 mg, 0.044 mmol, 0.45 equiv), **L7** (50 mg, 0.098 mmol, 1.0 equiv),  $\text{CH}_2\text{Cl}_2$  (3.0 mL) was stirred at rt overnight. The reaction mixture

became a light brown homogenous solution. The crude mixture was purified by trituration with diethyl ether to provide an off-white solid (47 mg, 55%).  $^1\text{H NMR}$  (500 MHz, Chloroform- $d$ )  $\delta$  7.45 (d,  $J = 1.5$  Hz, 1H), 7.37 (dd,  $J = 5.5$  Hz, 2.0 Hz, 1H), 7.32 (d,  $J = 1.5$  Hz, 1H), 7.17–7.12 (m, 3H), 7.12–7.05 (m, 3H), 7.01 (d,  $J = 9.0$  Hz, 1H), 6.72 (d,  $J = 6.5$  Hz, 1H), 5.93 (d,  $J = 6.0$  Hz, 1H), 3.84 (s, 3H), 3.47 (q,  $J = 7.0$  Hz, 2H), 3.40 (s, 3H), 3.33 (heptet,  $J = 7.0$  Hz, 1H), 2.63 (heptet,  $J = 6.5$  Hz, 1H), 2.43 (s, 3H), 2.29 (heptet,  $J = 6.5$  Hz, 1H), 1.19–1.75 (m, 6H), 1.55 (d,  $J = 6.5$  Hz, 3H), 1.47 (d,  $J = 7.0$  Hz, 3H), 1.32–1.23 (m, 2H), 1.23–1.11 (m, 4H), 0.91 (d,  $J = 15.5$  Hz, 9H), 0.88–0.81 (m, 9H).  $^{13}\text{C NMR}$  (126 MHz, Chloroform- $d$ )  $\delta$  158.7, 156.1, 154.4, 151.5, 151.4, 140.3, 139.3, 136.6, 136.1, 128.0, 127.0, 126.8, 126.5, 125.8, 125.4, 122.7, 120.6, 117.8, 115.1, 112.2, 66.0, 54.8, 54.6, 39.2, 34.3, 32.9, 31.7, 30.3, 28.9, 28.2, 28.1, 27.6, 27.5, 26.3, 25.4, 25.2, 24.9, 24.8, 24.5, 13.4 ppm (the observed complexity is due to C–P coupling).  $^{31}\text{P NMR}$  (203 MHz, Chloroform- $d$ )  $\delta$  58.8 ppm. **IR** (neat,  $\text{cm}^{-1}$ ) 1461, 1429, 1219, 1182, 1035, 1008, 1002, 890, 819, 754, 736.

#### L8-OMs precatalyst (**P8**):

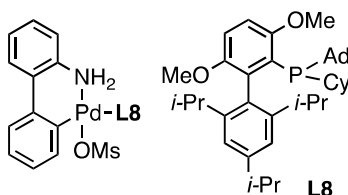

Following General Procedure B, a mixture of **S5** (233 mg, 0.315 mmol, 0.450 equiv), **L8** (412 mg, 0.700 mmol, 1.00 equiv),  $\text{CH}_2\text{Cl}_2$  (5.0 mL) was stirred at rt overnight. The reaction mixture became a light brown clear solution. The crude mixture was purified by trituration with diethyl ether to provide an off-white solid (507 mg, 76%).  $^1\text{H NMR}$  (500 MHz, Chloroform- $d$ ) 7.44 (t,  $J = 3.6$  Hz, 2H), 7.33 (d,  $J = 1.8$  Hz, 1H), 7.22–7.11 (m, 4H), 7.11–7.06 (m, 2H), 7.02 (d,  $J = 8.9$  Hz, 1H), 6.77–6.71 (m, 1H), 5.82 (s, 1H), 3.87 (s, 3H), 3.41 (s, 3H), 3.31 (heptet,  $J = 6.5$  Hz, 1H), 2.70–2.57 (m, 1H), 2.48 (s, 3H), 2.33 (heptet,  $J = 6.5$  Hz, 1H), 2.13–1.77 (m, 10H), 1.77–1.63 (m, 5H), 1.61–1.55 (m, 3H), 1.54 (d,  $J = 7.0$  Hz, 3H), 1.52–1.43 (m, 6H), 1.43–1.33 (m, 3H), 1.33–1.13 (m, 5H), 0.99–0.85 (m, 6H), 0.83 (d,  $J = 7.0$  Hz, 3H) ppm.  $^{13}\text{C NMR}$  (126 MHz, Chloroform- $d$ )  $\delta$  159.3, 156.3, 154.6, 154.1, 151.6, 151.4, 139.3, 136.5, 136.1, 135.9, 128.1, 127.2, 126.9, 126.6, 125.8, 125.2, 122.8, 120.6, 117.8, 115.1, 112.5, 55.0, 54.7, 40.5, 39.3, 36.1, 34.4, 34.0, 33.8, 32.9, 31.9, 29.2, 28.8, 28.7, 28.3, 27.7, 27.6, 26.4, 25.5, 25.2, 25.0, 24.8, 24.6

ppm (the observed complexity is due to C–P coupling).  $^{31}\text{P}$  NMR (203 MHz, Chloroform-d)  $\delta$  58.9 ppm. IR (neat,  $\text{cm}^{-1}$ ) 1461, 1224, 1183, 1036, 1008, 1001, 822, 753, 739.

### C) *O*-Arylation of Primary Alcohols

#### General Procedure C:

A 25 mL screw-top oven-dried test tube (Fisher Scientific 20 × 125 mm tubes, Cat. No. 1495937A) equipped with a stir bar and sealed with a screw cap (Kimble Chase Open Top S/T Closure, Cat. No. 73804-18400) and two Teflon septa (Thermo Scientific PTFE: 0.010" silicone: 0.090", Cat. No. B7995-18) was charged with aryl halide (if solid, 1.00 mmol, 1.00 equiv), alkyl alcohol, (if solid, 2.00 mmol, 2.00 equiv), precatalyst **P2** (8.5–17 mg, 1.0–2.0 mol %) or **P8** (9.6–24 mg, 1.0–2.5 mol %), and NaOt-Bu (115 mg, 1.20 mmol, 1.20 equiv). The reaction tube was recapped. The septum was pierced with a needle attached to a Schlenk line, and the tube was evacuated and backfilled with argon (this process was repeated a total of three times). Aryl halide and/or alkyl alcohol (if liquid) followed by 1,4-dioxane (1.0 mL) were added via syringe. The screw cap and the Teflon septum were wrapped completely with parafilm®. The reaction mixture was sonicated until there were no visible chunks of NaOt-Bu. The reaction was stirred at the time and temperature as indicated for each substrate. If heated, the reaction was allowed to cool to rt before addition of EtOAc (2 mL). The reaction slurry was then filtered through a pad of Celite® and rinsed with EtOAc. The crude material was concentrated *in vacuo* and purified via silica gel chromatography. In cases where the excess alcohol and the product were inseparable as determined by TLC analysis after workup, the crude reaction mixture was further treated successively with *N,N*-dimethylpyridin-4-amine (DMAP, 1.0–2.0 mg), triethylamine (Et<sub>3</sub>N, 140–167  $\mu\text{L}$ , 1.00–1.20 mmol, 1.00–1.20 equiv), acetic anhydride (Ac<sub>2</sub>O, 56–113  $\mu\text{L}$ , 0.65–1.20 mmol, 0.65–1.20 equiv). The resulting solution was stirred for 1 h at rt, concentrated *in vacuo*, and purified by silica gel chromatography.

#### 3-fluoro-2-methyl-6-((perfluorophenyl)methoxy)pyridine (**5**):

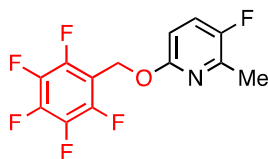

Following General Procedure C, a mixture of 6-bromo-3-fluoro-2-methylpyridine (190 mg, 1.00 mmol, 1.00 equiv), (perfluorophenyl)methanol (396 mg, 2.00 mmol, 2.00 equiv), NaOt-Bu (115

mg, 1.20 mmol, 1.20 equiv), **P2** (8.5 mg, 1.0 mol %), and 1,4-dioxane (1.0 mL) was stirred at rt for 6 h. The crude mixture was purified by flash column chromatography (gradient elution: 100% hexanes to 5% EtOAc in hexanes) to provide the title compound as a colorless low melting solid (1<sup>st</sup> run: 289 mg, 94%; 2<sup>nd</sup> run: 271 mg, 88%). **mp** = 39–41 °C. **<sup>1</sup>H NMR** (500 MHz, Chloroform-d)  $\delta$  7.24 (t,  $J$  = 10.0 Hz, 1H), 6.52 (d,  $J$  = 10.0 Hz, 1H), 5.39 (s, 2H), 2.40 (s, 3H) ppm. **<sup>13</sup>C NMR** (126 MHz, Chloroform-d)  $\delta$  157.7, 154.9–153.0 (d,  $J$  = 239.4 Hz), 147.0–145.1 (dm,  $J$  = 239.4 Hz), 142.7–140.7 (dm,  $J$  = 252 Hz), 142.6–142.4 (d,  $J$  = 25.2 Hz), 138.7–136.7 (dtd,  $J$  = 252 Hz), 126.6–126.4 (d,  $J$  = 25.2 Hz), 111.3 (td,  $J$  = 17.5 Hz, 3.5 Hz), 108.9 (d,  $J$  = 3.8 Hz), 55.4, 17.6 ppm. **<sup>19</sup>F NMR** (470 MHz, Chloroform-d)  $\delta$  -136.4 (m), -141.8 (dd,  $J$  = 23.5, 9.4 Hz), -153.7 (t,  $J$  = 23.5 Hz), -162.3 (td,  $J$  = 23.5 Hz, 9.4 Hz) ppm. **IR** (neat, cm<sup>-1</sup>) 1499, 1317, 1226, 1046, 932, 830, 798. **EA** Calcd. for C<sub>13</sub>H<sub>7</sub>F<sub>6</sub>NO: C, 50.83; H, 2.30, Found: C, 50.66; H, 2.46.

### 2-(3-methoxypropoxy)-4-methylpyridine (**6**):

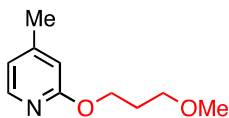

Following General Procedure C, a mixture of 2-chloro-4-methylpyridine (112  $\mu$ L, 1.00 mmol, 1.00 equiv), 3-methoxypropan-1-ol (95  $\mu$ L, 1.0 mmol, 1.0 equiv), NaO*t*-Bu (115 mg, 1.20 mmol, 1.20 equiv), **P2** (8.5 mg, 1.0 mol %), and 1,4-dioxane (1.0 mL) was stirred at rt for 6 h. The crude mixture was purified by flash column chromatography (gradient elution: 100% hexanes to 25% EtOAc in hexanes) to provide the title compound as a yellow liquid (1<sup>st</sup> run: 147 mg, 82%; 2<sup>nd</sup> run: 156 mg, 86%). Note: due to the high volatility of the final compound, the use of high vacuum was avoided in the isolation process. **<sup>1</sup>H NMR** (500 MHz, Chloroform-d)  $\delta$  7.95 (d,  $J$  = 5.2 Hz, 1H), 6.63 (d,  $J$  = 5.2 Hz, 1H), 6.49 (s, 1H), 4.30 (t,  $J$  = 6.4 Hz, 2H), 3.49 (t,  $J$  = 6.4 Hz, 2H), 3.29 (s, 3H), 2.22 (s, 3H), 1.99 (quintet,  $J$  = 6.4 Hz, 2H) ppm. **<sup>13</sup>C NMR** (126 MHz, Chloroform-d)  $\delta$  164.4, 150.0, 146.6, 118.4, 111.2, 69.7, 63.0, 28.9, 29.6, 21.1 ppm. **IR** (neat, cm<sup>-1</sup>) 2925, 2872, 1610, 1562, 1415, 1314, 1289, 1159, 1115, 1051, 811. **EA** Calcd. for C<sub>10</sub>H<sub>15</sub>NO<sub>2</sub>: C, 66.27; H, 8.34, Found: C, 66.14; H, 8.48.

### **N-(4-phenethoxyphenyl)acetamide (7):**

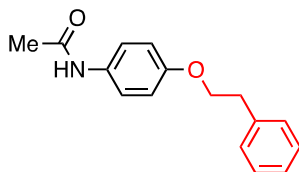

Following General Procedure C, a mixture of *N*-(4-chlorophenyl)acetamide (169 mg, 1.00 mmol, 1.00 equiv), 2-phenylethanol (240  $\mu$ L, 2.00 mmol, 2.00 equiv), NaO*t*-Bu (230 mg, 2.40 mmol, 2.40 equiv), **P2** (17 mg, 2.0 mol %), and dioxane (1.5 mL) was stirred at 40 °C for 15 h. The crude mixture was purified by flash column chromatography (gradient elution: 100% hexanes to 50% EtOAc in hexanes) to provide the title compound as a pale brown solid (1<sup>st</sup> run: 212 mg, 83%; 2<sup>nd</sup> run: 209 mg, 82%). **mp** = 96–98 °C. **<sup>1</sup>H NMR** (500 MHz, Chloroform-*d*)  $\delta$  8.27 (s, 1H), 7.41 (d, *J* = 8.5 Hz, 2H), 7.39–7.23 (m, 5H), 6.84 (d, *J* = 8.5 Hz, 2H), 4.14 (t, *J* = 7.0 Hz, 2H), 3.09 (t, *J* = 7.0 Hz, 2H), 2.12 (s, 3H) ppm. **<sup>13</sup>C NMR** (126 MHz, Chloroform-*d*)  $\delta$  168.8, 155.7, 138.3, 131.3, 129.1, 128.6, 126.6, 122.2, 114.9, 69.0, 35.9, 24.3 ppm. **IR** (neat,  $\text{cm}^{-1}$ ) 1657, 1605, 1556, 1510, 1474, 1371, 1241, 1173, 1031, 830, 726, 696, 611. **EA** Calcd. for C<sub>16</sub>H<sub>17</sub>NO<sub>2</sub>: C, 75.27; H, 6.71, Found: C, 75.55; H, 6.77.

### **5-(2-(pyridin-2-yl)ethoxy)pyrazolo[1,5-*a*]pyrimidine (8):<sup>4</sup>**

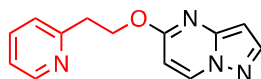

Following General Procedure C, a mixture of 5-chloropyrazolo[1,5-*a*]pyrimidine (154 mg, 1.00 mmol, 1.00 equiv), 2-pyridineethanol (169  $\mu$ L, 1.50 mmol, 1.50 equiv), NaO*t*-Bu (115 mg, 1.20 mmol, 1.20 equiv), **P2** (8.5 mg, 1.0 mol %), and dioxane (1.0 mL) was stirred at 40 °C for 15 h. The crude reaction mixture was diluted with EtOAc (1.0 mL), and DMAP (1.0 mg), Et<sub>3</sub>N (139  $\mu$ L, 1.00 mmol, 1.00 equiv) and Ac<sub>2</sub>O (56  $\mu$ L, 0.65 mmol, 0.65 equiv) were sequentially added. The new reaction mixture was stirred at rt and the reaction progress was monitored by TLC analysis (1:1 hexanes:EtOAc) until the excess alcohol was consumed (additional Ac<sub>2</sub>O was added after 15 min). The resulting crude product was purified by flash column chromatography (gradient elution: 10% EtOAc in hexanes to 80% EtOAc in hexanes) to provide the title compound as a pale orange solid (1<sup>st</sup> run: 184 mg, 77%; 2<sup>nd</sup> run: 174 mg, 72%). **<sup>1</sup>H NMR** (500 MHz, Chloroform-*d*)  $\delta$  8.55 (ddd, *J* = 5.0, 1.9, 1.0 Hz, 1H), 8.37 (dd, *J* = 7.5, 0.8 Hz, 1H), 7.93 (d, *J* = 2.2 Hz, 1H), 7.61 (td, *J* = 7.7, 1.9 Hz, 1H), 7.23 (dt, *J* = 7.8, 1.1 Hz, 1H), 7.14 (ddd, *J* =

7.5, 4.8, 1.1 Hz, 1H), 6.30 (dd,  $J = 2.2, 0.8$  Hz, 1H), 6.26 (d,  $J = 7.5$  Hz, 1H), 4.77 (t,  $J = 6.7$  Hz, 2H), 3.28 (t,  $J = 6.7$  Hz, 2H) ppm.  $^{13}\text{C}$  NMR (126 MHz, Chloroform-d)  $\delta$  161.3, 158.3, 149.6, 147.3, 145.0, 136.8, 136.5, 123.6, 121.7, 100.3, 94.6, 65.9, 37.5 ppm.

**1-((4-(trifluoromethyl)phenoxy)methyl)adamantine (9):**

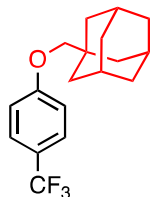

Following General Procedure C, a mixture of 1-bromo-4-(trifluoromethyl)benzene (140  $\mu\text{L}$ , 1.00 mmol, 1.00 equiv), 1-adamantanemethanol (332 mg, 2.00 mmol, 2.00 equiv), NaOt-Bu (115 mg, 1.20 mmol, 1.20 equiv), **P2** (8.5 mg, 1.0 mol %), and dioxane (1.0 mL) was stirred at rt for 6 h. The crude mixture was purified by flash column chromatography with 100% hexanes to provide the title compound as a white solid (1<sup>st</sup> run: 275 mg, 88%; 2<sup>nd</sup> run: 262 mg, 84%). mp = 133–134 °C.  $^1\text{H}$  NMR (500 MHz, Chloroform-d)  $\delta$  7.53 (d,  $J = 8.6$  Hz, 2H), 6.95 (d,  $J = 8.6$  Hz, 2H), 3.53 (s, 2H), 2.03 (m, 3H), 1.77 (d,  $J = 12.0$  Hz, 3H), 1.71 (d,  $J = 12.0$  Hz, 3H), 1.66 (s, 6H) ppm.  $^{13}\text{C}$  NMR (126 MHz, Chloroform-d)  $\delta$  162.3, 128.0–121.5 (q,  $J = 264.6$  Hz), 123.0–122.2 (q,  $J = 37.8$  Hz), 126.9 (q,  $J = 3.8$  Hz), 114.6, 78.6, 39.6, 37.3, 34.0, 28.4 ppm.  $^{19}\text{F}$  NMR (282 MHz, Chloroform-d)  $\delta$  -62.7 ppm. IR (neat,  $\text{cm}^{-1}$ ): 2902, 1320, 1309, 1264, 1162, 1155, 1108, 1067, 1024, 1008, 834, 812. EA Calcd. for  $\text{C}_{18}\text{H}_{21}\text{F}_3\text{O}$ : C, 69.66; H, 6.82, Found: C, 69.80; H, 6.81.

**2,2'-((oxybis(ethane-2,1-diyl))bis(oxy))dipyrazine (10):**

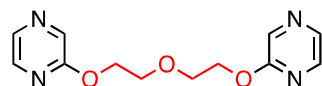

Following General Procedure C, a mixture of 2-chloropyrazine (196  $\mu\text{L}$ , 2.20 mmol, 2.20 equiv), 2,2'-oxybis(ethan-1-ol) (95  $\mu\text{L}$ , 1.0 mmol, 1.0 equiv), NaOt-Bu (269 mg, 2.80 mmol, 2.80 equiv), **P2** (17 mg, 2.0 mol %), and dioxane (1.5 mL) was stirred at 60 °C for 12 h. The crude mixture was purified by flash column chromatography (gradient elution: 5% acetone in hexanes to 30% acetone in hexanes) to provide the title compound as a beige solid (1<sup>st</sup> run: 200 mg, 76%; 2<sup>nd</sup> run: 175 mg, 67%). mp = 73–74 °C.  $^1\text{H}$  NMR (500 MHz, Chloroform-d)  $\delta$  8.11 (s, 2H), 7.97 (d,  $J = 3.0$  Hz, 2H), 7.91 (m, 2H), 4.38 (t,  $J = 5.0$  Hz, 4H), 3.78 (t,  $J = 5.0$  Hz, 4H).  $^{13}\text{C}$  NMR (126 MHz, Chloroform-d)  $\delta$  159.8, 140.3, 136.6, 136.0, 69.3, 65.2 ppm. IR (neat,  $\text{cm}^{-1}$ ): 1527,

1403, 1293, 1125, 1062, 1007, 935, 845. EA Calcd. for C<sub>12</sub>H<sub>14</sub>N<sub>4</sub>O<sub>3</sub>: C, 54.96; H, 5.38, Found: C, 55.17; H, 5.61.

#### 4-(2-cyclohexylethoxy)quinoline (11):

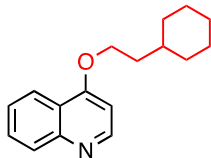

Following General Procedure C, a mixture of 4-chloroquinoline (131  $\mu$ L, 1.00 mmol, 1.00 equiv), 2-cyclohexylethan-1-ol (279  $\mu$ L, 2.00 mmol, 2.00 equiv), NaO*t*-Bu (115 mg, 1.20 mmol, 1.20 equiv), **P2** (17 mg, 2.0 mol %), and dioxane (1.0 mL) was stirred at 60 °C for 15 h. The crude mixture was purified by flash column chromatography (gradient elution: 5% EtOAc in hexanes to 30% EtOAc in hexanes) to provide the title compound as a white solid (1<sup>st</sup> run: 203 mg, 80%; 2<sup>nd</sup> run: 184 mg, 72%). mp = 88–90 °C. <sup>1</sup>H NMR (500 MHz, Chloroform-*d*)  $\delta$  8.65 (d, *J* = 5.0 Hz, 1H), 8.14 (d, *J* = 8.0 Hz, 1H), 7.98 (d, *J* = 8.0 Hz, 1H), 7.61 (t, *J* = 7.5 Hz, 1H), 7.41 (t, *J* = 7.5 Hz, 1H), 6.58 (d, *J* = 5.0 Hz, 1H), 4.06 (t, *J* = 5.0 Hz, 2H), 1.72–1.59 (m, 7H), 1.49 (m, 1H), 1.21–1.07 (m, 3H), 0.97–0.90 (m, 2H) ppm. <sup>13</sup>C NMR (126 MHz, Chloroform-*d*)  $\delta$  161.6, 151.4, 149.2, 129.6, 128.8, 125.4, 122.0, 121.5, 100.6, 66.5, 36.2, 34.7, 33.2, 26.4, 26.2 ppm. IR (neat, cm<sup>-1</sup>): 2919, 1598, 1569, 1503, 1382, 1314, 1159, 1110, 977, 829, 765, 737, 652. EA Calcd. for C<sub>17</sub>H<sub>21</sub>NO: C, 79.96; H, 8.29, Found: C, 79.56; H, 8.52.

#### *N*-methyl-*N*-(2-(quinoxalin-6-yloxy)ethyl)pyridin-2-amine (12):

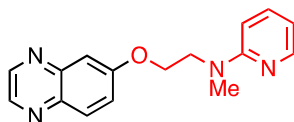

Following General Procedure C, a mixture of 6-bromoquinoxaline (209 mg, 1.00 mmol, 1.00 equiv), 2-(methyl-2-pyridinylamino)-ethanol (203  $\mu$ L, 1.50 mmol, 1.50 equiv), NaO*t*-Bu (115 mg, 1.20 mmol, 1.20 equiv), **P2** (8.5 mg, 1.0 mol %), and dioxane (1.0 mL) was stirred at 40 °C for 15 h. The crude reaction mixture was diluted with EtOAc (1.0 mL), and DMAP (1.0 mg), Et<sub>3</sub>N (140  $\mu$ L, 1.00 mmol, 1.00 equiv) and Ac<sub>2</sub>O (80  $\mu$ L, 0.85 mmol, 0.85 equiv) were sequentially added. The new reaction mixture was stirred at rt for 15 min. The resulting crude product was purified by flash column chromatography (gradient elution: 100% hexanes to 80% EtOAc in hexanes) to provide the title compound as a pale yellow solid (1<sup>st</sup> run: 181 mg, 65%;

2<sup>nd</sup> run: 197 mg, 70%). **mp** = 102–104 °C. <sup>1</sup>H NMR (500 MHz, Chloroform-d) δ 8.74 (d, *J* = 1.9 Hz, 1H), 8.67 (d, *J* = 1.9 Hz, 1H), 8.18 (ddd, *J* = 5.0, 2.0, 0.9 Hz, 1H), 7.96 (d, *J* = 9.0 Hz, 1H), 7.48–7.44 (m, 1H), 7.42–7.38 (m, 2H), 6.58–6.56 (m, 1H), 6.54 (d, 1H), 4.37 (t, *J* = 5.6 Hz, 2H), 4.08 (t, *J* = 5.6 Hz, 2H), 3.18 (s, 3H). <sup>13</sup>C NMR (126 MHz, Chloroform-d) δ 160.0, 158.3, 148.0, 145.0, 144.7, 142.4, 139.2, 137.4, 130.4, 123.5, 112.0, 107.6, 105.7, 67.0, 49.2, 37.9 ppm. **IR** (neat, cm<sup>-1</sup>): 1594, 1499, 1421, 1359, 1303, 1227, 1123, 1036, 949, 880, 766, 732, 614. **EA** Calcd. for C<sub>16</sub>H<sub>16</sub>N<sub>4</sub>O: C, 68.55; H, 5.75, Found: C, 68.29; H, 5.90.

### 2-([1,1'-biphenyl]-2-ylmethoxy)dibenzo[*b,d*]thiophene (13):

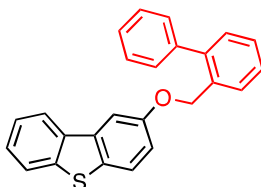

Following General Procedure C, a mixture of 2-bromodibenzo[*b,d*]thiophene (263 mg, 1.00 mmol, 1.00 equiv), 2-biphenylmethanol (368 mg, 2.00 mmol, 2.00 equiv), NaO*t*-Bu (115 mg, 1.20 mmol, 1.20 equiv), **P2** (8.5 mg, 1.0 mol %), and dioxane (1.0 mL) was stirred at rt for 15 h. The crude product was purified by flash column chromatography (gradient elution: 100% hexanes to 50% CH<sub>2</sub>Cl<sub>2</sub> in hexanes) to provide the title compound as a viscous oil (1<sup>st</sup> run: 290 mg, 79%; 2<sup>nd</sup> run: 291 mg, 79%). <sup>1</sup>H NMR (500 MHz, Chloroform-d) δ 8.11–8.10 (m, 1H), 7.92–7.91 (m, 1H), 7.84–7.82 (m, 1H), 7.78 (d, *J* = 8.7 Hz, 1H), 7.68 (d, *J* = 2.5 Hz, 1H), 7.63–7.61 (m, 2H), 7.58–7.48 (m, 8H), 7.20 (dd, *J* = 8.7, 2.5 Hz, 1H), 5.21 (s, 2H) ppm. <sup>13</sup>C NMR (126 MHz, Chloroform-d) δ 156.7, 142.2, 140.6, 136.7, 135.5, 134.1, 131.7, 130.3, 129.7, 129.4, 128.5, 128.4, 127.9, 127.6, 126.8, 124.2, 123.5, 123.1, 121.7, 116.6, 106.5, 68.8 ppm. **IR** (neat, cm<sup>-1</sup>): 1601, 1556, 1464, 1432, 1193, 1005, 905, 837, 745, 729, 701, 683. **HRMS** Calcd. for C<sub>25</sub>H<sub>18</sub>OS: 366.11 Found: [M+H] = 367.11.

### 5-phenethoxyisoquinoline (14):<sup>4</sup>

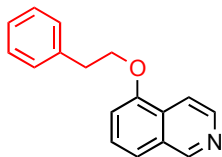

Following General Procedure C, a mixture of 5-bromoisoquinoline (208 mg, 1.00 mmol, 1.00



equiv), 2-phenylethan-1-ol (240  $\mu$ L, 2.00 mmol, 2.00 equiv), NaOt-Bu (115 mg, 1.20 mmol, 1.20 equiv), **P2** (8.5 mg, 1.0 mol %), and dioxane (1.0 mL) was stirred at 40  $^{\circ}$ C for 15 h. The crude reaction mixture was diluted with CH<sub>2</sub>Cl<sub>2</sub> (1.0 mL), and DMAP (2.0 mg), Et<sub>3</sub>N (167  $\mu$ L, 1.20 mmol, 1.20 equiv) and Ac<sub>2</sub>O (113  $\mu$ L, 1.20 mmol, 1.20 equiv) were sequentially added. The new reaction mixture was stirred at rt for 1 h. The resulting crude product was purified by flash column chromatography (gradient elution: 100% hexanes to 20% acetone in hexanes) to provide the title compound as a orange solid (1<sup>st</sup> run: 212 mg, 85%; 2<sup>nd</sup> run: 212 mg, 85%). **<sup>1</sup>H NMR** (500 MHz, Chloroform-d)  $\delta$  9.18 (s, 1H), 8.52 (d,  $J$  = 5.8 Hz, 1H), 7.98 (d,  $J$  = 5.9 Hz, 1H), 7.49 (d,  $J$  = 8.1 Hz, 1H), 7.44 (t,  $J$  = 7.9 Hz, 1H), 7.42–7.32 (m, 4H), 7.27–7.24 (m, 1H), 6.95 (d,  $J$  = 7.5 Hz, 1H), 4.33 (t,  $J$  = 6.8 Hz, 2H), 3.23 (t,  $J$  = 6.8 Hz, 2H) ppm. **<sup>13</sup>C NMR** (126 MHz, Chloroform-d)  $\delta$  153.7, 151.9, 142.8, 138.3, 129.6, 129.2, 128.7, 128.6, 127.5, 126.8, 119.5, 115.2, 108.5, 69.2, 35.9 ppm.

#### 2-(2-(thiophen-2-yl)ethoxy)quinolone (**15**):

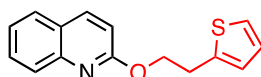

Following General Procedure C, a mixture of 2-chloroquinoline (164 mg, 1.00 mmol, 1.00 equiv), 2-(thiophen-2-yl)ethan-1-ol (222  $\mu$ L, 2.00 mmol, 2.00 equiv), NaOt-Bu (115 mg, 1.20 mmol, 1.20 equiv), **P2** (8.5 mg, 1.0 mol %), and dioxane (1.5 mL) was stirred at rt for 12 h. The crude mixture was purified by flash column chromatography (gradient elution: 100% hexanes to 10% EtOAc in hexanes) to provide the title compound as a light yellow oil (1<sup>st</sup> run: 238 mg, 93%; 2<sup>nd</sup> run: 232 mg, 91%). **<sup>1</sup>H NMR** (500 MHz, Chloroform-d)  $\delta$  7.99 (d,  $J$  = 8.5 Hz, 1H), 7.85 (d,  $J$  = 8.5, 1H), 7.72 (dd,  $J$  = 8.1, 1.4 Hz, 1H), 7.63 (ddd,  $J$  = 8.4, 7.0, 1.5 Hz, 1H), 7.39 (ddd,  $J$  = 8.1, 7.0, 1.2 Hz, 1H), 7.18 (dd,  $J$  = 5.0, 1.4 Hz, 1H), 6.98–6.92 (m, 3H), 4.73 (t,  $J$  = 6.8 Hz, 2H), 3.38 (td,  $J$  = 6.8, 0.8 Hz, 2H). **<sup>13</sup>C NMR** (126 MHz, Chloroform-d)  $\delta$  161.9, 146.7, 141.0, 138.8, 129.6, 127.5, 127.4, 126.9, 125.5, 125.2, 124.1, 123.9, 113.3, 66.3, 29.8 ppm. **IR** (neat, cm<sup>-1</sup>): 1617, 1604, 1572, 1506, 1427, 1393, 1311, 1275, 1256, 1237, 1111, 1010, 819, 755, 694. **EA Calcd.** for C<sub>15</sub>H<sub>13</sub>NOS: C, 70.56; H, 5.13, Found: C, 70.83; H, 5.11.

### 1-(2-methoxy-2-phenylethoxy)-4-phenoxybenzene (**16**):

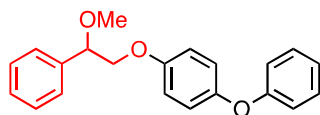

Following General Procedure C, a mixture of 1-bromo-4-phenoxybenzene (175  $\mu$ L, 1.00 mmol, 1.00 equiv), 2-methoxy-2-phenylethan-1-ol (222  $\mu$ L, 2.00 mmol, 2.00 equiv), NaO*t*-Bu (115 mg, 1.20 mmol, 1.20 equiv), **P2** (17 mg, 2.0 mol %), and dioxane (1.5 mL) was stirred at 60 °C for 15 h. The crude mixture was purified by flash column chromatography (gradient elution: 100% hexanes to 15% EtOAc in hexanes) to provide the title compound as a viscous oil (1<sup>st</sup> run: 232 mg, 72%; 2<sup>nd</sup> run: 230 mg, 72%). <sup>1</sup>H NMR (500 MHz, Chloroform-*d*)  $\delta$  7.42 (d, *J* = 4.3 Hz, 4H), 7.38–7.34 (m, 1H), 7.30 (t, *J* = 8.0 Hz, 2H), 7.05 (t, *J* = 7.0 Hz, 1H), 6.97–6.92 (m, 4H), 6.91–6.89 (m, 2H), 4.61 (dd, *J* = 7.9, 3.6 Hz, 1H), 4.17 (dd, *J* = 10.2, 7.9 Hz, 1H), 4.00 (dd, *J* = 10.2, 3.6 Hz, 1H), 3.38 (s, 3H). <sup>13</sup>C NMR (126 MHz, Chloroform-*d*)  $\delta$  158.6, 155.2, 150.5, 138.6, 129.8, 128.8, 128.5, 127.2, 122.6, 120.9, 117.8, 116.0, 82.5, 73.1, 57.4 ppm. IR (neat, cm<sup>-1</sup>): 1588, 1495, 1487, 1453, 1216, 1118, 1067, 1024, 839, 757, 700, 691. HRMS Calcd. for C<sub>21</sub>H<sub>20</sub>O<sub>3</sub>: 320.39, Found: [M+H] = 321.15.

### 4-(4-butoxyphenyl)morpholine (**3**):<sup>1</sup>

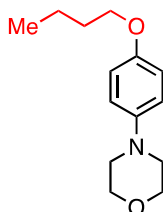

Following General Procedure C, a mixture of 4-(4-bromophenyl)morpholine (242 mg, 1.00 mmol, 1.00 equiv), butan-1-ol (183  $\mu$ L, 2.00 mmol, 2.00 equiv), NaO*t*-Bu (115 mg, 1.20 mmol, 1.20 equiv), **P8** (9.6 mg, 1.0 mol %), and dioxane (1.0 mL) was stirred at rt for 4 h. The crude mixture was purified by flash column chromatography (gradient elution: 100% hexanes to 6% acetone in hexanes with an increment of 1% acetone in hexanes) to provide the title compound as a white solid (1<sup>st</sup> run: 192 mg, 82%; 2<sup>nd</sup> run: 216 mg, 92%).

Following General Procedure B, a mixture of 4-(4-chlorophenyl)morpholine (198 mg, 1.00 mmol, 1.00 equiv), butan-1-ol (183  $\mu$ L, 2.00 mmol, 2.00 equiv), NaO*t*-Bu (115 mg, 1.20 mmol, 1.20 equiv), **P8** (12 mg, 1.2 mol %), and dioxane (1.0 mL) was stirred at rt for 15 h. The crude

mixture was purified by flash column chromatography (gradient elution: 100% hexanes to 6% acetone in hexanes with an increment of 1% acetone in hexanes) to provide the title compound as a white solid (1<sup>st</sup> run: 207 mg, 88%; 2<sup>nd</sup> run: 223 mg, 95%).

<sup>1</sup>H NMR (500 MHz, Chloroform-d)  $\delta$  6.89–6.84 (m, 4H), 3.92 (t,  $J$  = 6.5 Hz, 2H), 3.86 (t,  $J$  = 4.5 Hz, 4H), 3.05 (t,  $J$  = 5.0 Hz, 4H), 1.77–1.72 (m, 2H), 1.49 (sextet,  $J$  = 7.4 Hz, 2H), 0.97 (t,  $J$  = 7.4 Hz, 3H). <sup>13</sup>C NMR (126 MHz, Chloroform-d)  $\delta$  153.7, 145.7, 118.0, 115.4, 68.3, 67.3, 51.0, 31.6, 19.5, 14.1 ppm.

#### 4-methoxy-2-methyl-1-(pent-3-yn-1-yloxy)benzene (17):

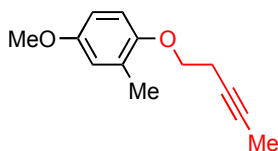

Following General Procedure C, a mixture of 1-chloro-4-methoxy-2-methylbenzene (134  $\mu$ L, 1.00 mmol, 1.00 equiv), pent-3-yn-1-ol (184  $\mu$ L, 2.00 mmol, 2.00 equiv), NaOt-Bu (115 mg, 1.20 mmol, 1.20 equiv), **P8** (19 mg, 2.0 mol %), and dioxane (1.0 mL) was stirred at 80 °C for 15 h. The crude mixture was purified by flash column chromatography (gradient elution: 100% hexanes to 15% EtOAc in hexanes) to provide the title compound as a clear oil (1<sup>st</sup> run: 128 mg, 63%; 2<sup>nd</sup> run: 112 mg, 55%). <sup>1</sup>H NMR (500 MHz, Chloroform-d)  $\delta$  6.77 (d,  $J$  = 8.8 Hz, 1H), 6.74 (d,  $J$  = 3.1 Hz, 1H), 6.67 (dd,  $J$  = 8.8, 3.2 Hz, 1H), 4.00 (t,  $J$  = 7.1 Hz, 2H), 3.76 (s, 3H), 2.61 (tq,  $J$  = 7.3, 2.5 Hz, 2H), 2.23 (s, 3H), 1.81 (t,  $J$  = 2.6 Hz, 3H). <sup>13</sup>C NMR (126 MHz, Chloroform-d)  $\delta$  153.9, 151.2, 128.8, 117.1, 113.3, 111.1, 75.6, 68.0, 55.9, 29.9, 20.2, 16.6, 3.7 ppm. IR (neat, cm<sup>-1</sup>): 2919, 1499, 1466, 1280, 1217, 1159, 1128, 1046, 866, 793, 717, 704. EA Calcd. for C<sub>13</sub>H<sub>16</sub>O<sub>2</sub>: C, 76.44; H, 7.90, Found: C, 76.72; H, 7.74.

#### 2-(cyclopropylmethoxy)-9H-thioxanthen-9-one (18):

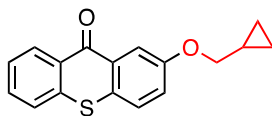

Following General Procedure C, a mixture of 2-chloro-9H-thioxanthen-9-one (247 mg, 1.00 mmol, 1.00 equiv), cyclopropylmethanol (162  $\mu$ L, 2.00 mmol, 2.00 equiv), NaOt-Bu (115 mg, 1.20 mmol, 1.20 equiv), **P8** (19 mg, 2.0 mol %), and dioxane (1.0 mL) was stirred at 40 °C for 15 h. The crude mixture was purified by flash column chromatography (gradient elution: 100%

hexanes to 6% EtOAc in hexanes with an increment of 1% EtOAc in hexanes) to provide the title compound as a bright yellow solid (1<sup>st</sup> run: 202 mg, 71%; 2<sup>nd</sup> run: 221 mg, 78%). **mp** = 95–96 °C. **<sup>1</sup>H NMR** (500 MHz, Chloroform-d)  $\delta$  8.63 (d,  $J$  = 8.5 Hz, 1H), 8.04 (d,  $J$  = 3.0 Hz, 1H), 7.63–7.58 (m, 2H), 7.51–7.46 (m, 2H), 7.30 (dd,  $J$  = 9.0 Hz, 3.0 Hz, 1H), 3.96 (d,  $J$  = 7.0 Hz, 2H), 1.37–1.29 (m, 1H), 0.68 (dd,  $J$  = 8.0 Hz, 5.0 Hz, 2H), 0.40 (dd,  $J$  = 5.0 Hz, 5.0 Hz, 2H). **<sup>13</sup>C NMR** (126 MHz, Chloroform-d)  $\delta$  179.9, 158.0, 137.7, 132.2, 130.3, 130.1, 129.2, 128.8, 127.5, 126.2, 126.2, 123.4, 111.2, 73.4, 10.3, 3.5 ppm. **IR** (neat, cm<sup>-1</sup>): 1629, 1600, 1589, 1477, 1459, 1437, 1406, 1341, 1317, 1293, 1261, 1228, 1217, 1153, 1115, 1009, 881, 820, 746, 741, 708, 677, 631. **EA** Calcd. for C<sub>17</sub>H<sub>14</sub>O<sub>2</sub>S: C, 72.32; H, 5.00, Found: C, 72.06; H, 4.87.

**5-(3-methoxypropoxy)benzo[*d*][1,3]dioxole (19):**

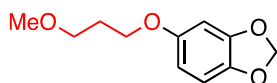

Following General Procedure C, a mixture of 5-chlorobenzo[*d*][1,3]dioxole (117  $\mu$ L, 1.00 mmol, 1.00 equiv), 3-methoxypropan-1-ol (191  $\mu$ L, 2.00 mmol, 2.00 equiv), NaO*t*-Bu (115 mg, 1.20 mmol, 1.20 equiv), **P8** (24 mg, 2.5 mol %), and dioxane (1.0 mL) was stirred at 60 °C for 18 h. The crude mixture was purified by flash column chromatography (gradient elution: 100% hexanes to 25% Et<sub>2</sub>O in hexanes with an increment of 3% Et<sub>2</sub>O in hexanes) to provide the title compound as a light yellow oil (1<sup>st</sup> run: 170 mg, 81%; 2<sup>nd</sup> run: 184 mg, 87%). Note: due to the high volatility of the final compound, the use of high vacuum was avoided in the isolation process. **<sup>1</sup>H NMR** (500 MHz, Chloroform-d)  $\delta$  6.69 (d,  $J$  = 8.5 Hz, 1H), 6.50 (d,  $J$  = 2.0 Hz, 1H), 6.32 (dd,  $J$  = 8.5 Hz, 2.0 Hz, 1H), 5.90 (s, 2H), 3.97 (t,  $J$  = 6.5 Hz, 2H), 3.54 (t,  $J$  = 6.5 Hz, 2H), 3.35 (s, 3H), 2.01 (quintet,  $J$  = 6.5 Hz, 2H). **<sup>13</sup>C NMR** (126 MHz, Chloroform-d)  $\delta$  154.7, 148.4, 141.7, 108.1, 105.8, 101.3, 98.3, 69.4, 65.9, 58.9, 29.8 ppm. **IR** (neat, cm<sup>-1</sup>): 2877, 1502, 1487, 1471, 1394, 1241, 1180, 1116, 1035, 937, 924, 815. **EA** Calcd. for C<sub>11</sub>H<sub>14</sub>O<sub>4</sub>: C, 62.85; H, 6.71, Found: C, 62.99; H, 6.70.

**5-(2-cyclohexylethoxy)-2-methylbenzo[d]oxazole (20):**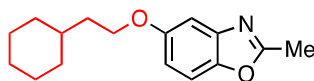

Following General Procedure C, a mixture of 5-chloro-2-methylbenzo[d]oxazole (168 mg, 1.00 mmol, 1.00 equiv), 2-cyclohexylethan-1-ol (279  $\mu$ L, 2.00 mmol, 2.00 equiv), NaOt-Bu (115 mg, 1.20 mmol, 1.20 equiv), **P8** (14 mg, 1.5 mol %), and dioxane (1.5 mL) was stirred at 60  $^{\circ}$ C for 15 h. The crude mixture was purified by flash column chromatography (gradient elution: 100% hexanes to 10% EtOAc in hexanes) to provide the title compound as an orange oil (1<sup>st</sup> run: 197 mg, 76%; 2<sup>nd</sup> run: 202 mg, 78%). <sup>1</sup>H NMR (500 MHz, Chloroform-d)  $\delta$  7.32 (d,  $J$  = 8.9 Hz, 1H), 7.12 (d,  $J$  = 2.5 Hz, 1H), 6.87 (dd,  $J$  = 8.9, 2.5 Hz, 1H), 4.01 (t,  $J$  = 6.7 Hz, 2H), 2.60 (s, 3H), 1.78–1.64 (m, 7H), 1.52 (t,  $J$  = 10.6, 6.9, 3.5 Hz, 1H), 1.30–1.12 (m, 3H), 0.97 (qd,  $J$  = 12.2, 3.3 Hz, 2H). <sup>13</sup>C NMR (126 MHz, Chloroform-d)  $\delta$  164.6, 156.6, 145.6, 142.4, 113.3, 110.2, 103.6, 66.9, 36.8, 34.7, 33.4, 26.6, 26.4, 14.7 ppm. IR (neat,  $\text{cm}^{-1}$ ): 2920, 2849, 1577, 1468, 1439, 1282, 1270, 1172, 1155, 947, 819, 802. EA Calcd. for C<sub>16</sub>H<sub>21</sub>NO<sub>2</sub>: C, 74.10; H, 8.16. Found: C, 74.40; H, 8.36.

**(S)-6-(2-(2,2-dimethyl-1,3-dioxolan-4-yl)ethoxy)quinoline (21):**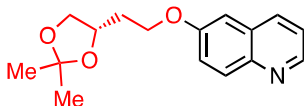

Following General Procedure C, a mixture of 6-chloroquinoline (164 mg, 1.00 mmol, 1.00 equiv), (S)-2-(2,2-dimethyl-1,3-dioxolan-4-yl)ethan-1-ol (285  $\mu$ L, 2.00 mmol, 2.00 equiv), NaOt-Bu (115 mg, 1.20 mmol, 1.20 equiv), **P8** (19 mg, 2.0 mol %), and dioxane (1.0 mL) was stirred at rt for 15 h. The crude reaction mixture was diluted with CH<sub>2</sub>Cl<sub>2</sub> (1.0 mL), and DMAP (2.0 mg), Et<sub>3</sub>N (167  $\mu$ L, 1.20 mmol, 1.20 equiv) and Ac<sub>2</sub>O (113  $\mu$ L, 1.20 mmol, 1.20 equiv) were sequentially added. The new reaction mixture was stirred at rt for 1 h. The resulting crude product was purified by flash column chromatography (gradient elution: 100% hexanes to 30% acetone in hexanes) to provide the title compound as a dark orange oil (1<sup>st</sup> run: 252 mg, 92%; 2<sup>nd</sup> run: 257 mg, 94%). <sup>1</sup>H NMR (500 MHz, Chloroform-d)  $\delta$  8.77 (dd,  $J$  = 4.2, 1.6 Hz, 1H), 8.03 (d,  $J$  = 8.0 Hz, 1H), 7.99 (d,  $J$  = 9.2 Hz, 1H), 7.35 (dt,  $J$  = 8.3, 3.3 Hz, 2H), 7.08 (d,  $J$  = 2.8 Hz, 1H), 4.35 (quintet,  $J$  = 6.4 Hz, 1H), 4.25–4.19 (m, 2H), 4.16 (dd,  $J$  = 8.1, 5.9 Hz, 1H), 3.69 (t,  $J$  = 7.5 Hz, 1H), 2.12 (q,  $J$  = 6.3 Hz, 2H), 1.44 (s, 3H), 1.37 (s, 3H). <sup>13</sup>C NMR (126 MHz, Chloroform-

d)  $\delta$  157.0, 148.2, 144.6, 135.0, 131.1, 129.5, 122.6, 121.6, 109.1, 106.1, 73.5, 69.7, 65.2, 33.7, 27.2, 25.9 ppm. **IR** (neat,  $\text{cm}^{-1}$ ): 2984, 2930, 2874, 1622, 1595, 1499, 1464, 1378, 1369, 1323, 1224, 1169, 1157, 1057, 832. **EA** Calcd. for  $\text{C}_{16}\text{H}_{19}\text{NO}_3$ : C, 70.31; H, 7.01, Found: C, 70.03; H, 7.13.

**5-(2,2,3,3,3-pentafluoropropoxy)benzo[*c*][1,2,5]thiadiazole (22):**

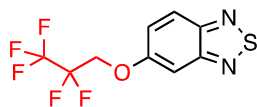

Following General Procedure C, a mixture of 5-chlorobenzo[*c*][1,2,5]thiadiazole (171 mg, 1.00 mmol, 1.00 equiv), 2,2,3,3,3-pentafluoropropan-1-ol (199  $\mu\text{L}$ , 2.00 mmol, 2.00 equiv), *NaOt*-Bu (115 mg, 1.20 mmol, 1.20 equiv), **P8** (19 mg, 2.0 mol %), and dioxane (1.0 mL) was stirred at 40  $^{\circ}\text{C}$  for 2.5 h. The crude mixture was purified by flash column chromatography (gradient elution: 100% hexanes to 5% EtOAc in hexanes with an increment of 1% EtOAc in hexanes) to provide the title compound as a white solid (1<sup>st</sup> run: 236 mg, 83%; 2<sup>nd</sup> run: 243 mg, 85%). **mp** = 62–64  $^{\circ}\text{C}$ . **<sup>1</sup>H NMR** (500 MHz, Chloroform-*d*)  $\delta$  7.85 (d,  $J = 9.5$  Hz, 1H), 7.31 (dd,  $J = 9.5, 2.5$  Hz 1H), 7.20 (d,  $J = 2.5$  Hz, 1H), 4.51 (t,  $J = 12$  Hz, 2H). **<sup>13</sup>C NMR** (126 MHz, Chloroform-*d*)  $\delta$  158.9, 155.6, 151.8, 124.7, 122.6, 99.6, 64.9 (t,  $J = 28.4$  Hz) ppm (perfluorinated carbons are not reported due to low signal intensities). **<sup>19</sup>F NMR** (376 MHz, Chloroform-*d*)  $\delta$  -83.4 (s, 3F), -123.1 (t,  $J = 12.0$  Hz, 2F) ppm. **IR** (neat,  $\text{cm}^{-1}$ ): 1615, 1489, 1450, 1378, 1280, 1182, 1143, 1099, 1070, 964, 947, 929, 846, 822. **EA** Calcd. for  $\text{C}_9\text{H}_5\text{F}_5\text{N}_2\text{OS}$ : C, 38.04; H, 1.77, Found: C, 38.31; H, 1.70.

**1,3-dimethoxy-5-(2,2,2-trifluoroethoxy)benzene (23):<sup>5</sup>**

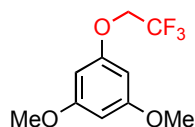

Following General Procedure C, a mixture of 1-bromo-3,5-dimethoxybenzene (217 mg, 1.00 mmol, 1.00 equiv), 2,2,2-trifluoroethan-1-ol (146  $\mu\text{L}$ , 2.00 mmol, 2.00 equiv), *NaOt*-Bu (115 mg, 1.20 mmol, 1.20 equiv), **P8** (14 mg, 1.5 mol %), and dioxane (1.0 mL) was stirred at 60  $^{\circ}\text{C}$  for 15 h. The crude mixture was purified by flash column chromatography (gradient elution: 100% hexanes to 10% Et<sub>2</sub>O in hexanes) to provide the title compound as a light yellow oil (1<sup>st</sup> run: 208 mg, 88%; 2<sup>nd</sup> run: 205 mg, 87%). Note: due to the high volatility of the final compound,

the use of high vacuum was avoided in the isolation process.  $^1\text{H NMR}$  (500 MHz, Chloroform-d)  $\delta$  6.16 (t,  $J = 2.1$  Hz, 1H), 6.11 (d,  $J = 2.1$  Hz, 2H), 4.30 (q,  $J = 8.1$  Hz, 2H), 3.78 (s, 6H).  $^{13}\text{C NMR}$  (126 MHz, Chloroform-d)  $\delta$  161.8, 159.4, 126.8–120.2 (q,  $J = 277.2$  Hz), 94.7, 93.9, 66.4–65.5 (q,  $J = 36.5$  Hz), 55.6 ppm.  $^{19}\text{F NMR}$  (282 MHz, Chloroform-d)  $\delta$  –75.3 ppm.

### 3-(2-(2-cyclohexylphenoxy)ethyl)thiophene (24):

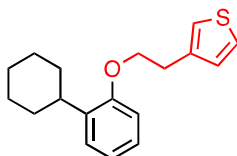

Following General Procedure C, a mixture of 1-bromo-2-cyclohexylbenzene (185  $\mu\text{L}$ , 1.00 mmol, 1.00 equiv), 2-(thiophen-3-yl)ethan-1-ol (224  $\mu\text{L}$ , 2.00 mmol, 2.00 equiv), NaOt-Bu (115 mg, 1.20 mmol, 1.20 equiv), **P8** (19 mg, 2.0 mol %), and dioxane (1.0 mL) was stirred at rt for 15 h. Celite® (~ 2 g) and diethyl ether ( $\text{Et}_2\text{O}$ , 3 mL) were added to the crude reaction mixture, which was briefly sonicated to ensure full suspension of Celite® in the solution.  $\text{Et}_2\text{O}$  was carefully removed *in vacuo* to afford a dry Celite® powder absorbed with the crude reaction mixture. The resulting powder was loaded onto a column for purification by flash chromatography (gradient elution: 100% hexanes to 5% EtOAc in hexanes with an increment of 1% EtOAc in hexanes) to provide the title compound as a yellow oil (1<sup>st</sup> run: 191 mg, 67%; 2<sup>nd</sup> run: 215 mg, 75%).  $^1\text{H NMR}$  (500 MHz, Chloroform-d)  $\delta$  7.30 (dd,  $J = 4.9, 2.9$  Hz, 1H), 7.21 (dd,  $J = 7.6, 1.7$  Hz, 1H), 7.19–7.10 (m, 2H), 7.08 (dd,  $J = 4.9, 1.2$  Hz, 1H), 6.94 (td,  $J = 7.5, 1.0$  Hz, 1H), 6.86 (dd,  $J = 8.2, 1.0$  Hz, 1H), 4.20 (t,  $J = 6.5$  Hz, 2H), 3.18 (t,  $J = 6.5$  Hz, 2H), 2.96 (tt,  $J = 11.3, 3.2$  Hz, 1H), 1.86–1.77 (m, 5H), 1.48–1.24 (m, 5H).  $^{13}\text{C NMR}$  (126 MHz, Chloroform-d)  $\delta$  156.0, 139.1, 136.5, 128.6, 126.7, 126.5, 125.4, 121.7, 120.8, 111.3, 68.2, 37.1, 33.2, 30.6, 27.3, 26.6 ppm. IR (neat,  $\text{cm}^{-1}$ ): 2920, 2849, 1491, 1447, 1232, 1139, 1101, 1051, 1030, 999, 854, 840, 772. EA Calcd. for  $\text{C}_{18}\text{H}_{22}\text{OS}$ : C, 75.48; H, 7.74, Found: C, 75.77; H, 7.72.

### 1-isopropyl-2-((3-(trifluoromethyl)benzyl)oxy)benzene (25):

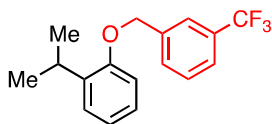

Following General Procedure C, a mixture of 1-bromo-2-isopropylbenzene (153  $\mu\text{L}$ , 1.00 mmol, 1.00 equiv), (3-(trifluoromethyl)phenyl)methanol (272  $\mu\text{L}$ , 2.00 mmol, 2.00 equiv), NaOt-Bu

(115 mg, 1.20 mmol, 1.20 equiv), **P8** (14 mg, 1.5 mol %), and dioxane (1.0 mL) was stirred at rt for 12 h. Celite® (~ 2 g) and diethyl ether (Et<sub>2</sub>O, 3 mL) were added to the crude reaction mixture, which was briefly sonicated to ensure full suspension of Celite® in the solution. Et<sub>2</sub>O was carefully removed *in vacuo* to afford a dry Celite® powder absorbed with the crude reaction mixture. The resulting powder was loaded onto a column for purification by flash chromatography (gradient elution: 100% hexanes to 5% EtOAc in hexanes with an increment of 1% EtOAc in hexanes) to provide the title compound as a light yellow oil (1<sup>st</sup> run: 273 mg, 93%; 2<sup>nd</sup> run: 275 mg, 93%). <sup>1</sup>H NMR (500 MHz, Chloroform-d) δ 7.80 (s, 1H), 7.71 (d, *J* = 7.7 Hz, 1H), 7.66 (d, *J* = 7.9 Hz, 1H), 7.57 (t, *J* = 7.7 Hz, 1H), 7.35 (dd, *J* = 7.5, 1.7 Hz, 1H), 7.25–7.22 (m, 1H), 7.05 (td, *J* = 7.5, 1.1 Hz, 1H), 6.96 (dd, *J* = 8.2, 1.2 Hz, 1H), 5.18 (s, 2H), 3.50 (hept, *J* = 6.9 Hz, 1H), 1.34 (d, *J* = 7.1 Hz, 6H). <sup>13</sup>C NMR (126 MHz, Chloroform-d) δ 155.7, 138.8, 137.6, 131.5–139.7 (q, *J* = 32.8 Hz), 130.5, 129.2, 127.6–121.1 (q, *J* = 272.2 Hz), 126.8, 126.5, 124.8 (q, *J* = 3.8 Hz), 124.0 (q, *J* = 3.8 Hz), 121.5, 111.8, 69.4, 27.1, 22.9 ppm. <sup>19</sup>F NMR (282 MHz, Chloroform-d) δ –64.0 ppm. IR (neat, cm<sup>-1</sup>): 2966, 1599, 1584, 1490, 1447, 1362, 1328, 1233, 1164, 1122, 1073, 831, 794, 750. HRMS Calcd. for C<sub>17</sub>H<sub>17</sub>F<sub>3</sub>O: 294.32, Found: [M+H] = 295.13.

### 2-(4-(benzyloxy)butoxy)-1,3-dimethylbenzene (**26**):

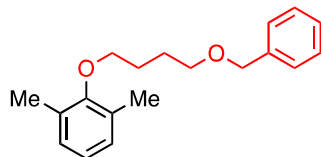

Following General Procedure C, a mixture of 2-bromo-1,3-dimethylbenzene (133 μL, 1.00 mmol, 1.00 equiv), 4-(benzyloxy)butan-1-ol (352 μL, 2.00 mmol, 2.00 equiv), **P1** (24 mg, 2.5 mol %), NaOt-Bu (115 mg, 1.20 mmol, 1.20 equiv), 1,4-dioxane (1 mL) was stirred at rt for 18 h. Celite® (~ 2 g) and diethyl ether (Et<sub>2</sub>O, 3 mL) were added to the crude reaction mixture, which was briefly sonicated to ensure full suspension of Celite® in the solution. Et<sub>2</sub>O was carefully removed *in vacuo* to afford a dry Celite® powder absorbed with the crude reaction mixture. The resulting powder was loaded onto the column for purification by silica gel chromatography (gradient elution: 100% hexanes to 7% EtOAc in hexanes with an increment of 1% EtOAc in hexanes) to provide the title compound as a light yellow oil (1<sup>st</sup> run: 216 mg, 76%; 2<sup>nd</sup> run: 239 mg, 84%). <sup>1</sup>H NMR (500 MHz, Chloroform-d) δ 7.38–7.36 (m, 4H), 7.32–7.28 (m,



1H), 7.02 (dd,  $J = 7.6, 3.0$  Hz, 2H), 6.92 (ddd,  $J = 8.0, 6.7, 3.0$  Hz, 1H), 4.56 (d,  $J = 2.8$  Hz, 2H), 3.79 (td,  $J = 6.1, 3.0$  Hz, 2H), 3.58 (td,  $J = 5.8, 2.9$  Hz, 2H), 2.29 (d,  $J = 3.2$  Hz, 6H), 1.96–1.84 (m, 4H).  $^{13}\text{C}$  NMR (126 MHz, Chloroform- $d$ )  $\delta$  156.1, 138.8, 131.1, 129.0, 128.6, 127.8, 127.8, 123.8, 73.2, 72.1, 70.3, 27.4, 26.8, 16.5. IR (neat,  $\text{cm}^{-1}$ ): 2921, 2856, 1475, 1453, 1262, 1202, 1090, 1055, 1028, 1100, 766, 733. EA Calcd. for  $\text{C}_{19}\text{H}_{24}\text{O}_2$ : C, 80.24; H, 8.51, Found: C, 80.35; H, 8.50.

#### References:

1. Wu, X.; Fors, B. P.; Buchwald, S. L. *Angew. Chem. Int. Ed.* **2011**, *50*, 9943.
2. Su, M.; Buchwald, S. L. *Angew. Chem. Int. Ed.* **2012**, *51*, 4710.
3. (a) Bruno, N. C.; Tudge, M. T.; Buchwald, S. L. *Chem. Sci.* **2013**, *4*, 916. (b) Bruno, N. C.; Buchwald, S. L. *Org. Lett.* **2013**, *15*, 2876.
4. Maligres, P. E.; Li, J.; Krska, S. W.; Schreier, J. D.; Raheem, I. T. *Angew. Chem. Int. Ed.* **2012**, *51*, 9071.
5. Fujita, M.; Mishima, E.; Okuyama, T. *J. Phys. Org. Chem.* **2007**, *20*, 241.

### III. Copies of NMR Spectra

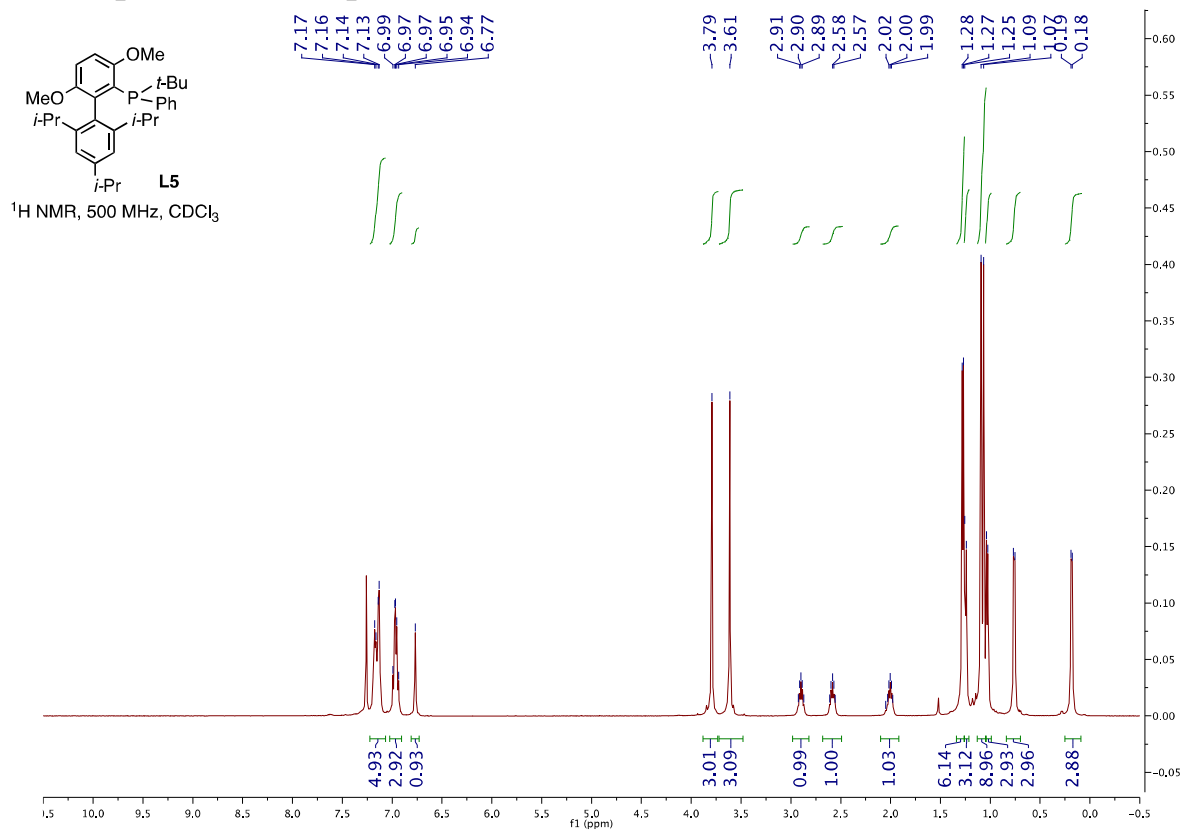

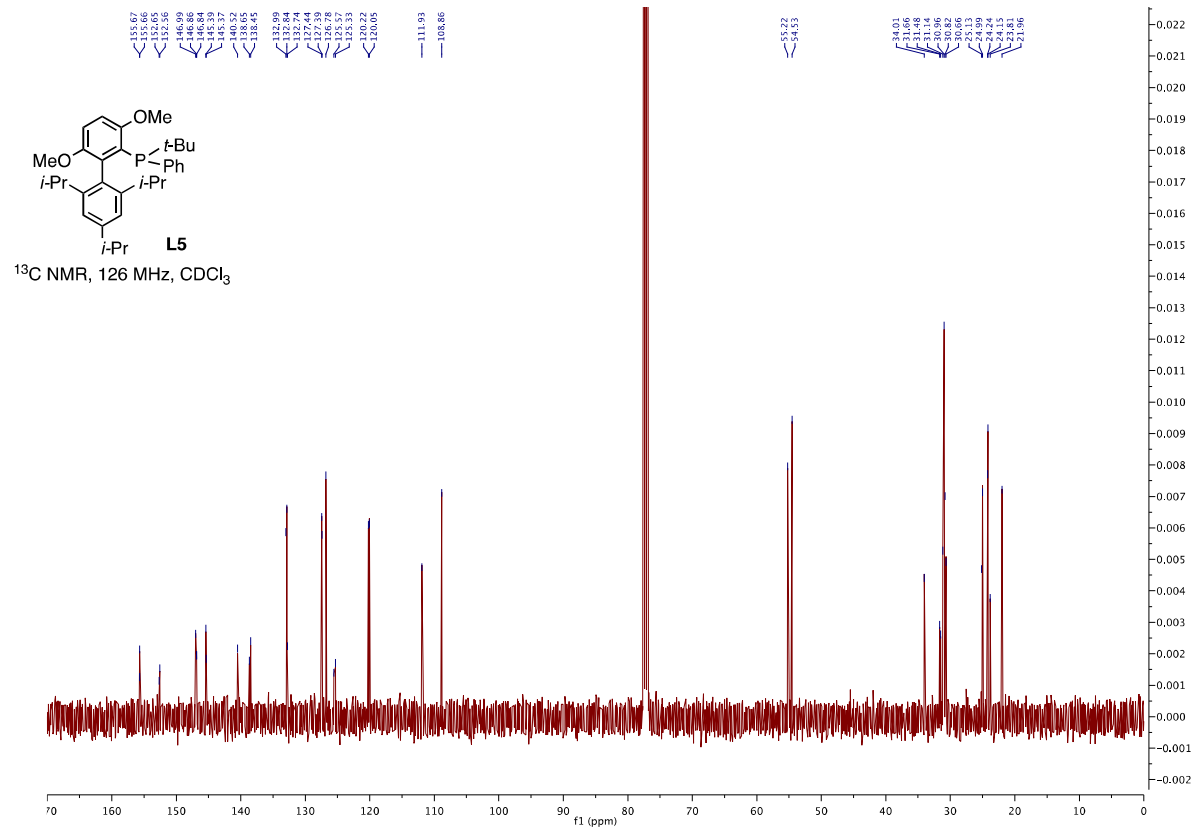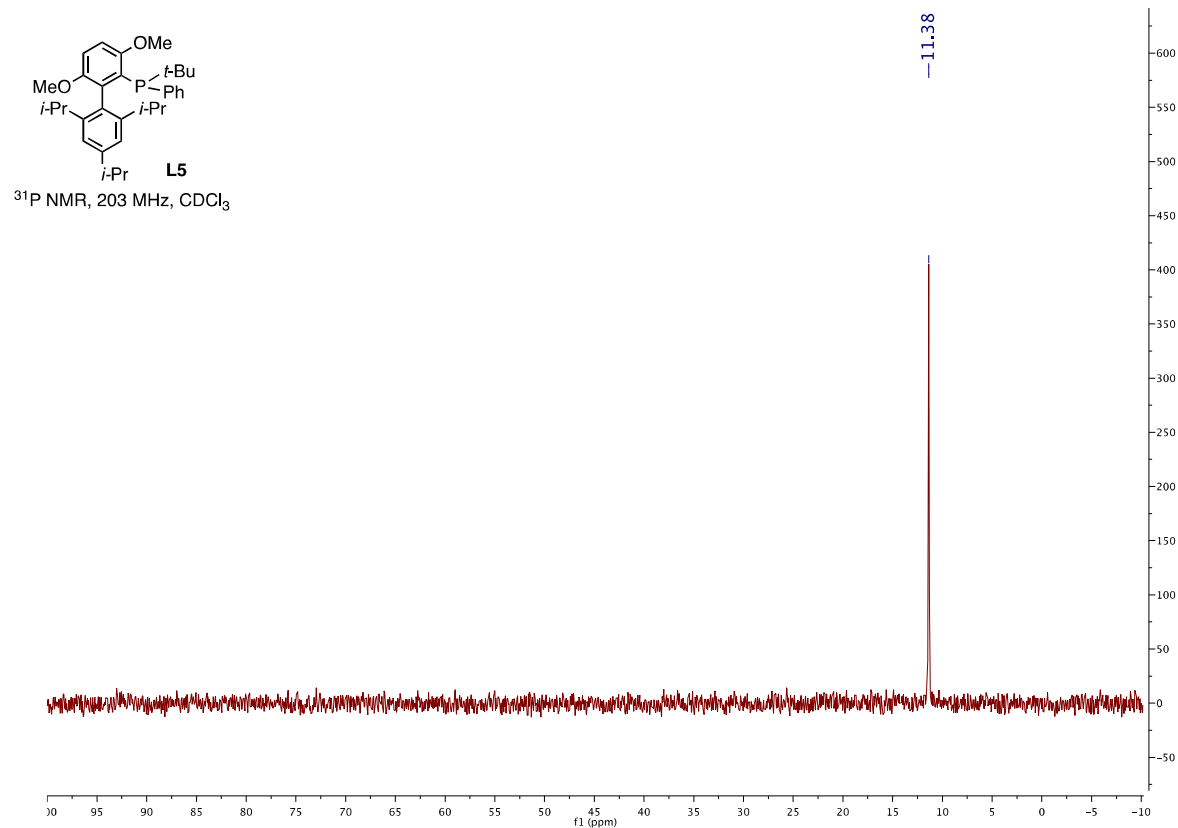

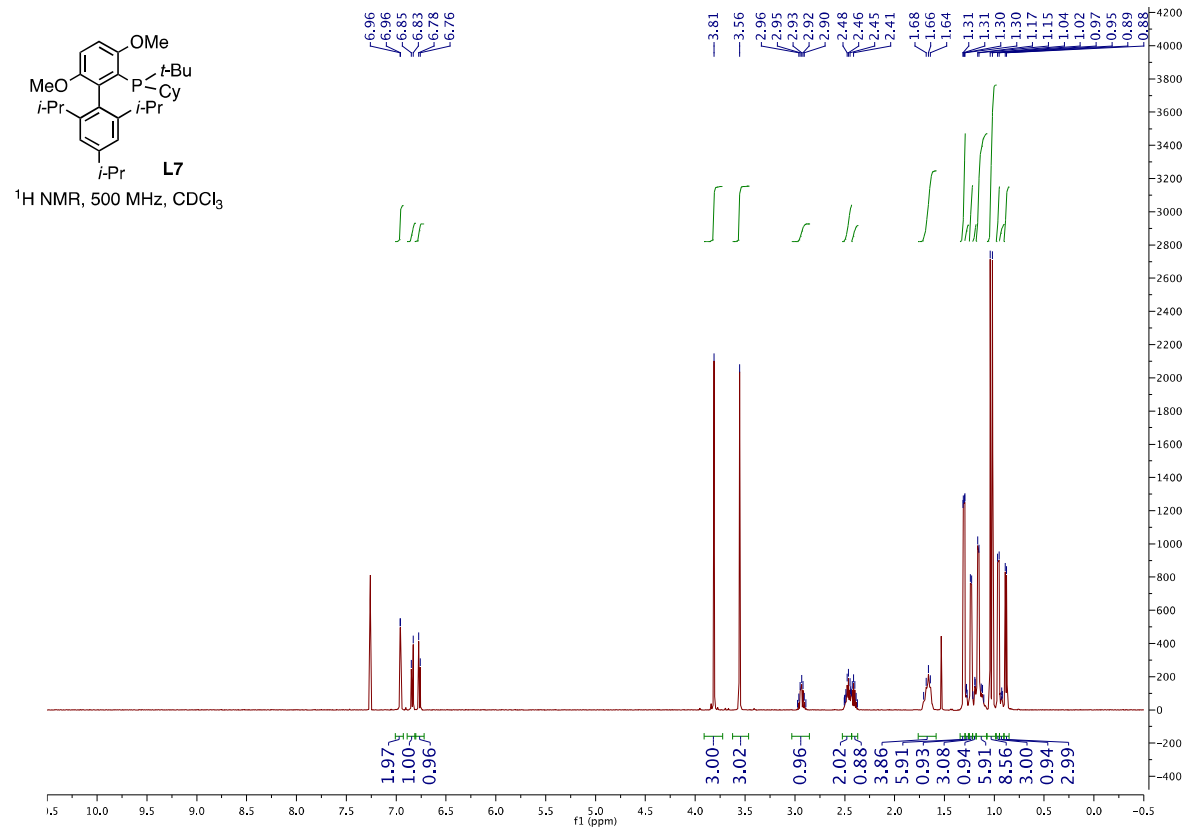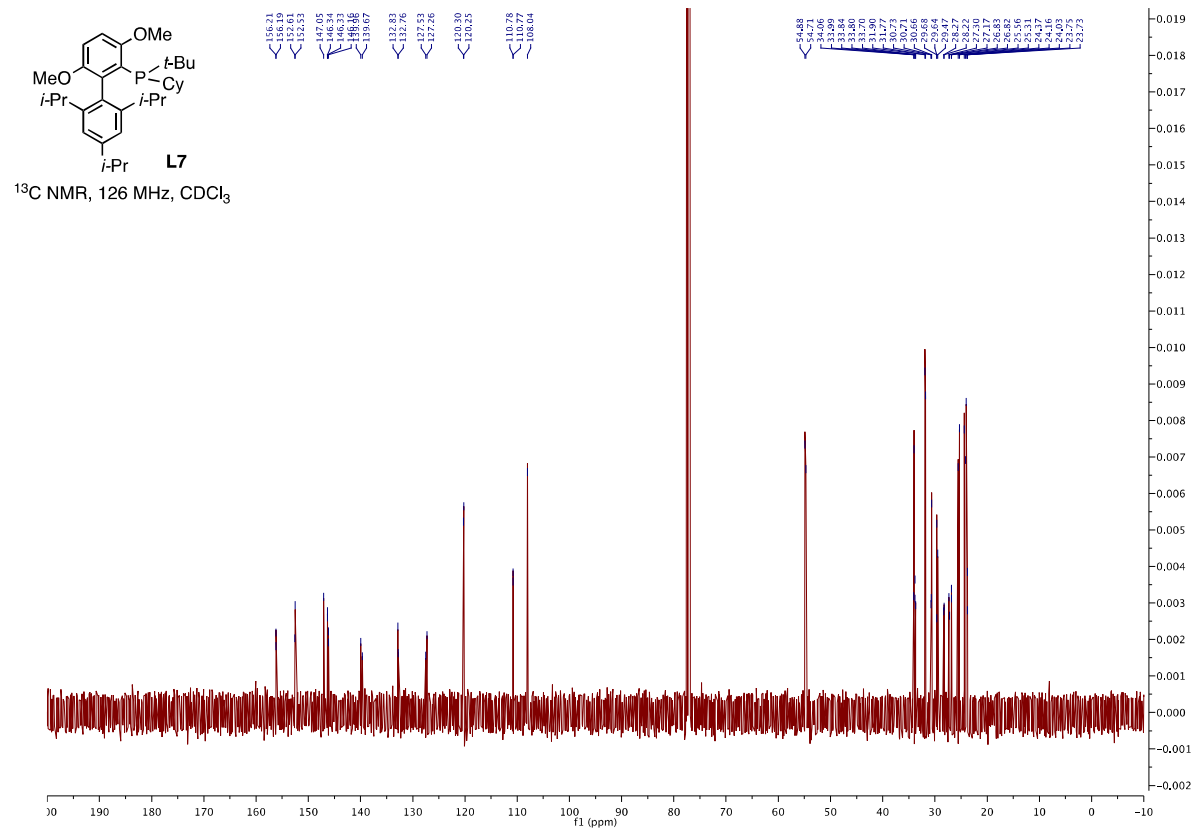

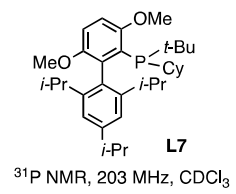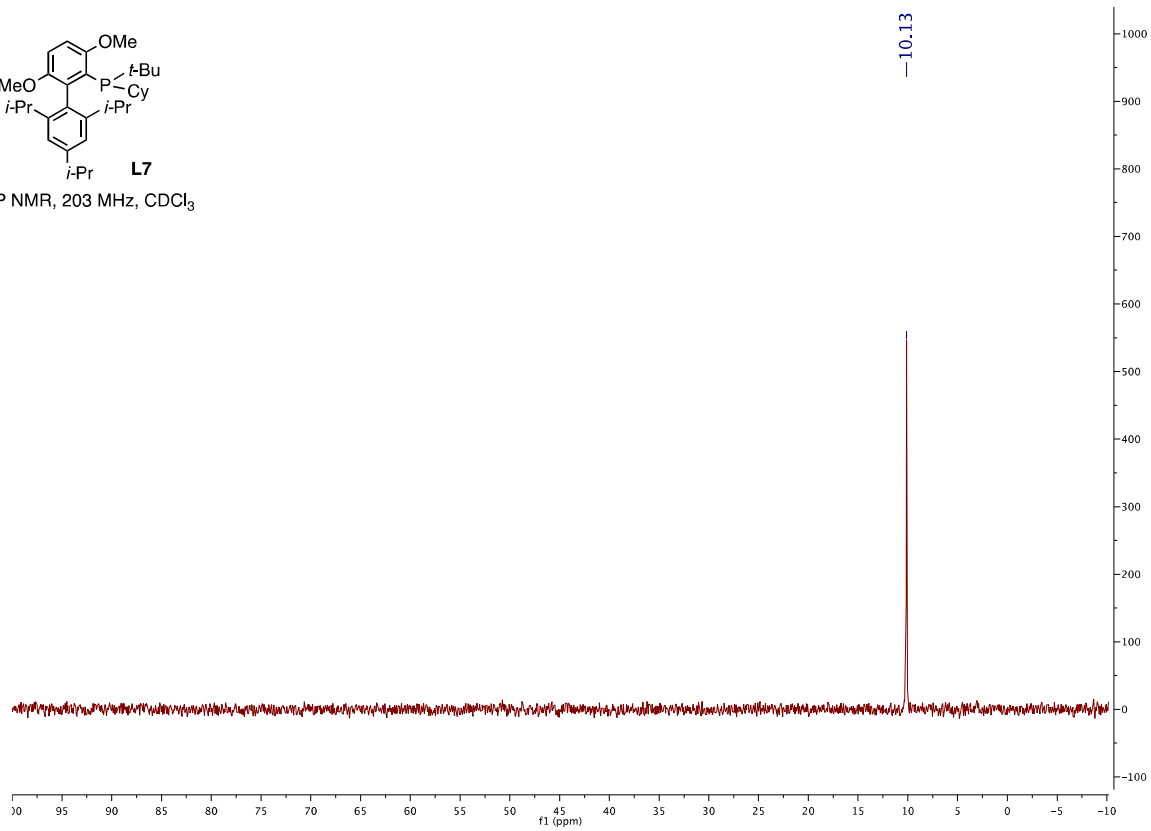



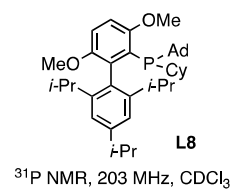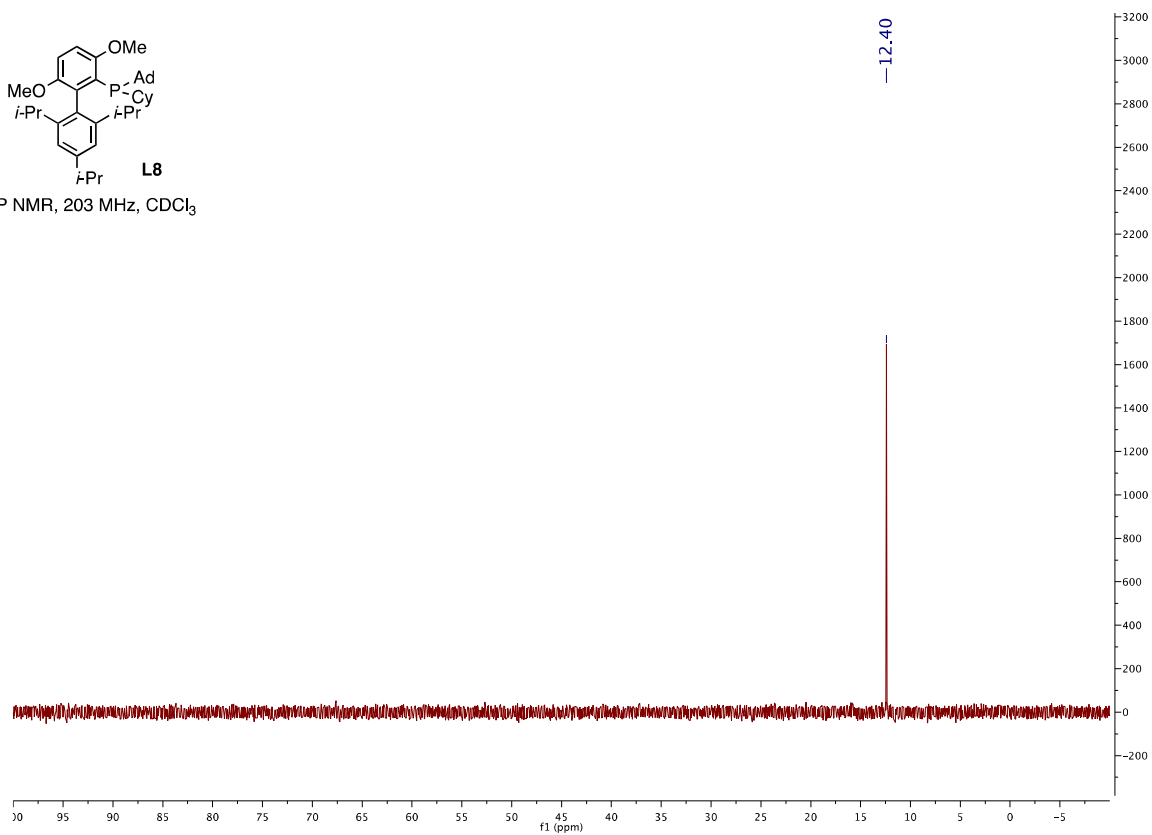

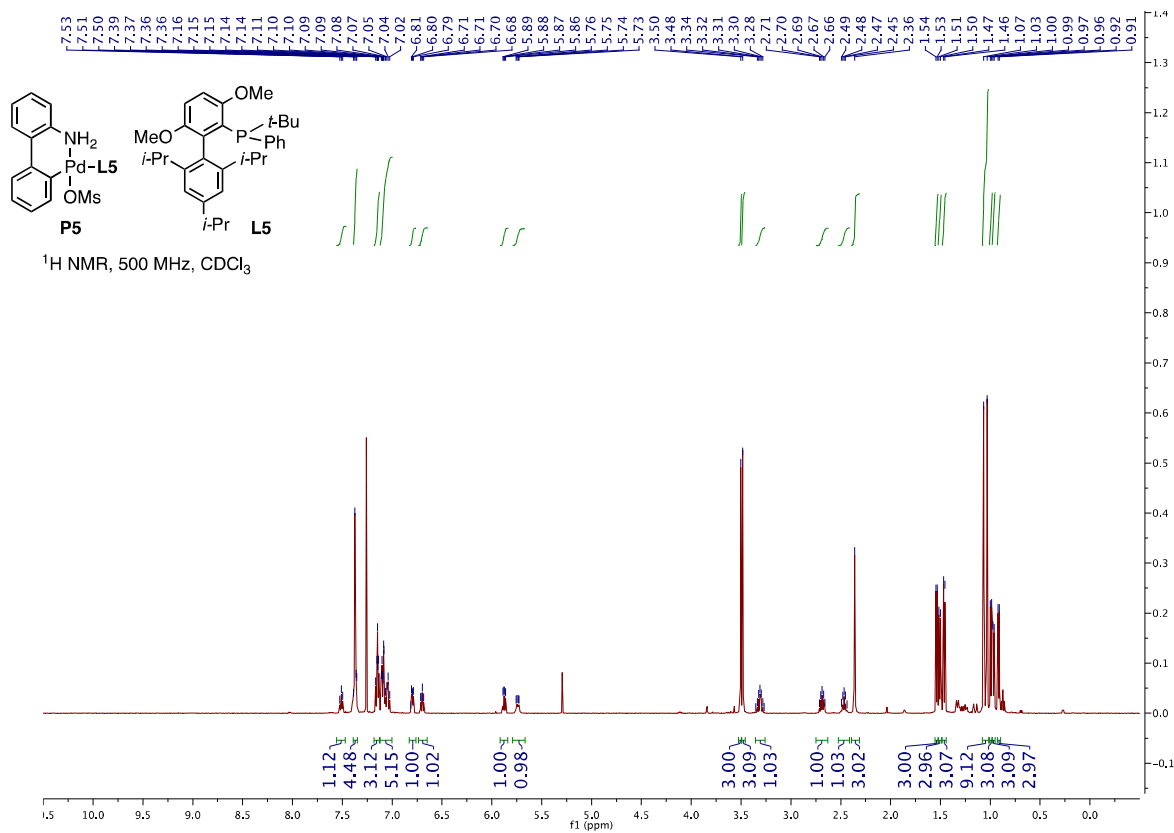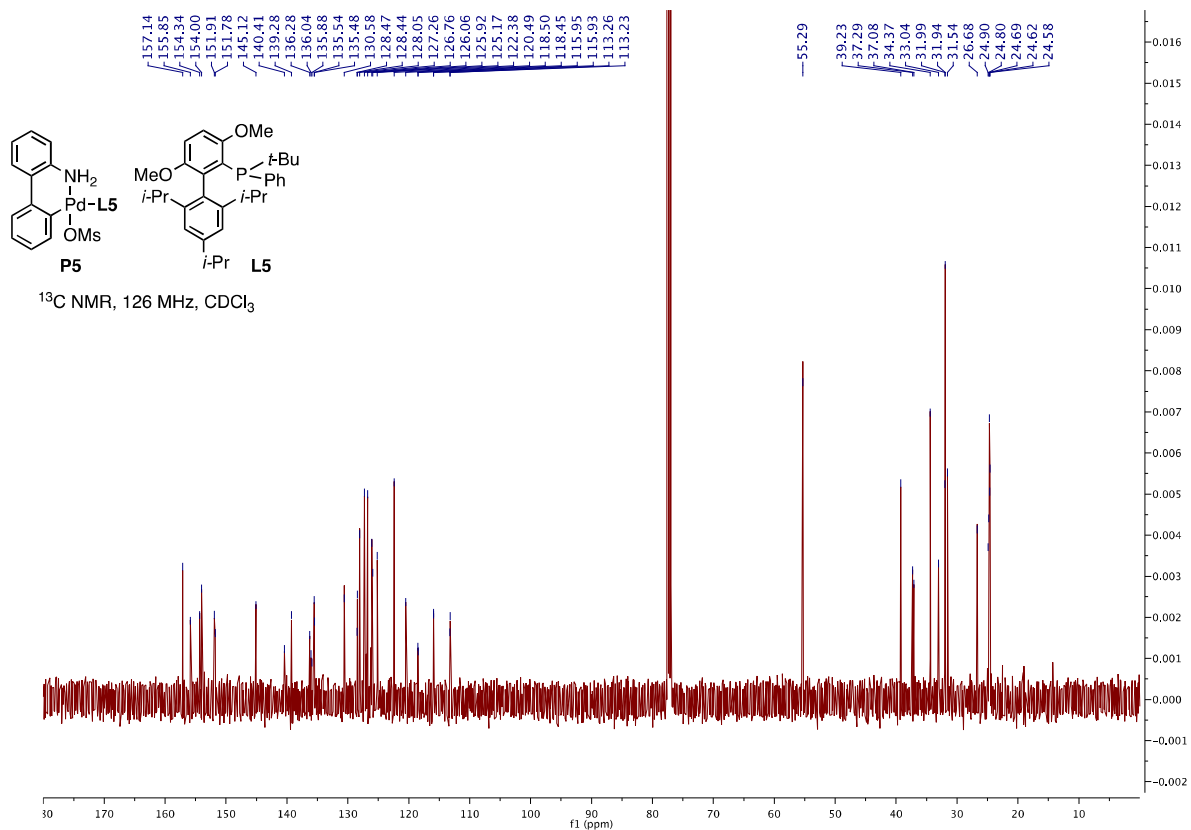



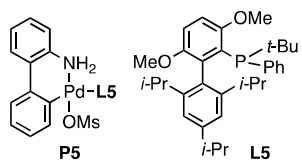

$^{31}\text{P}$  NMR, 203 MHz,  $\text{CDCl}_3$

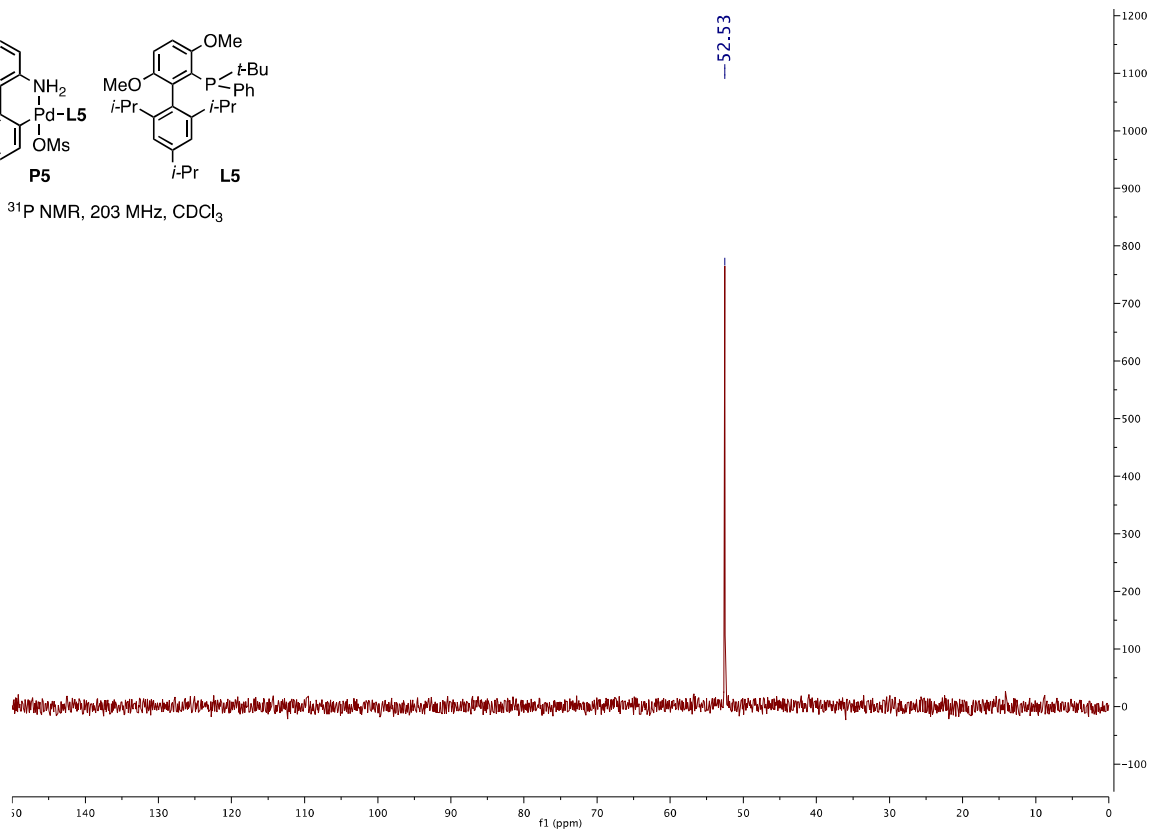

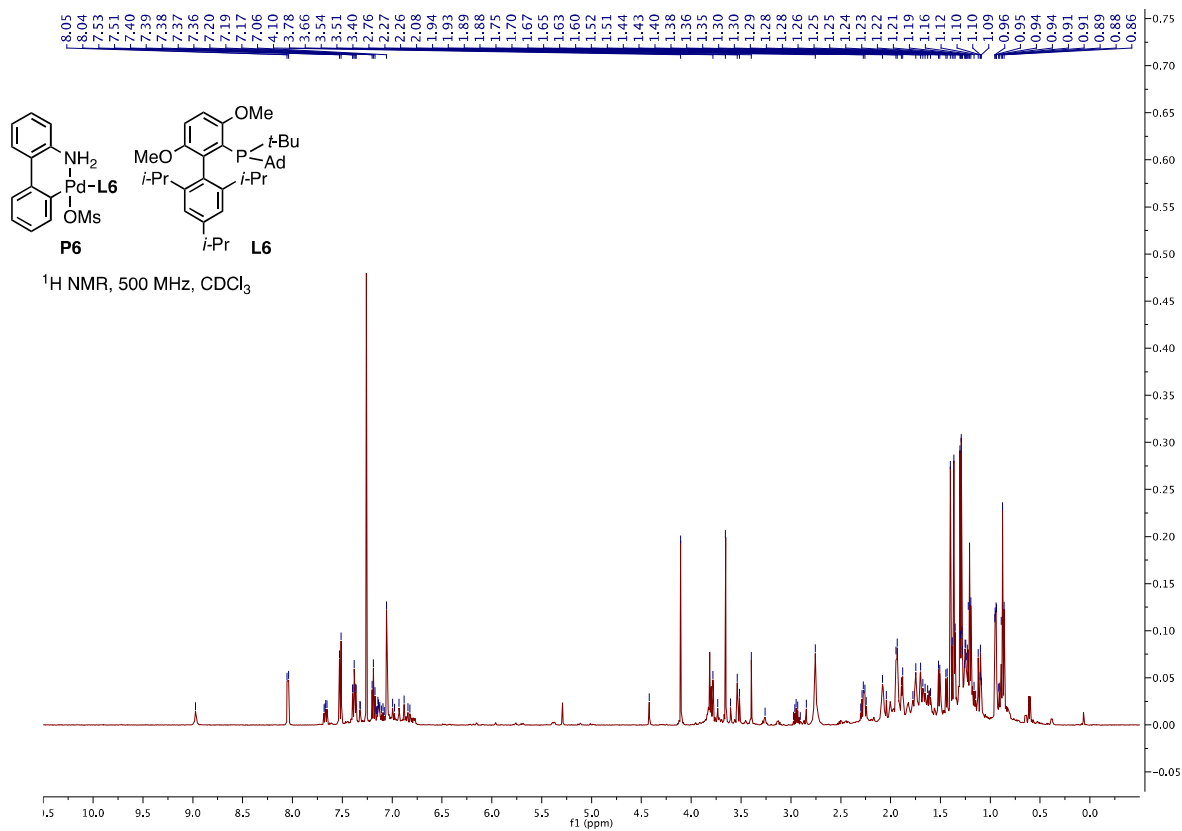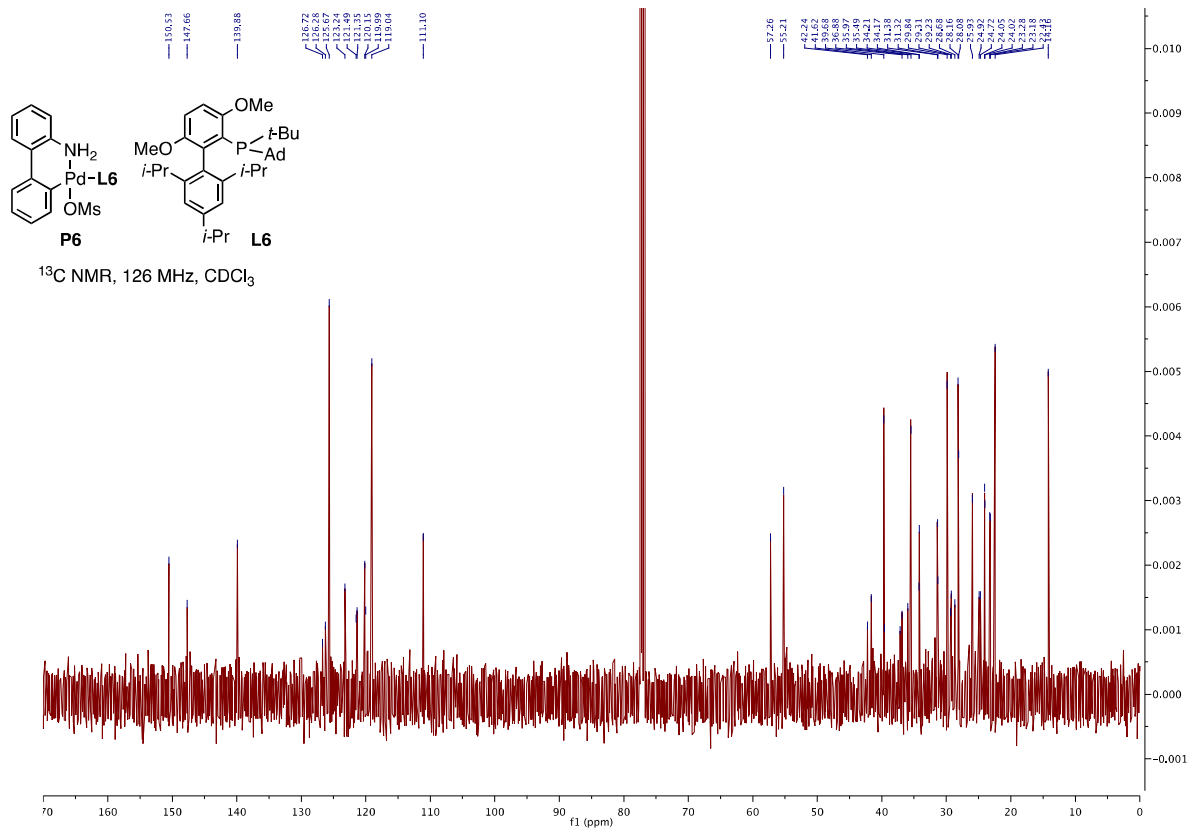

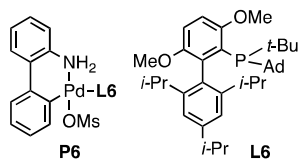

$^{31}\text{P}$  NMR, 203 MHz,  $\text{CDCl}_3$

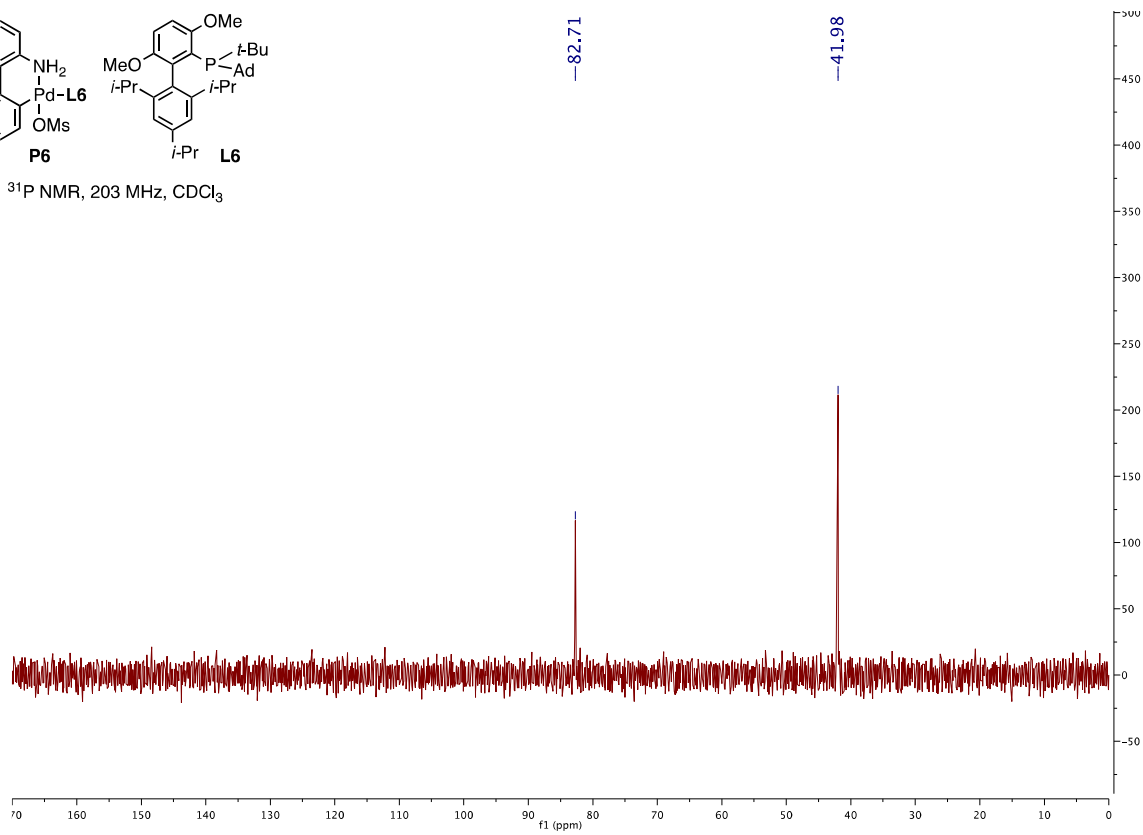



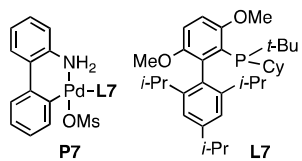

$^{31}\text{P}$  NMR, 203 MHz,  $\text{CDCl}_3$

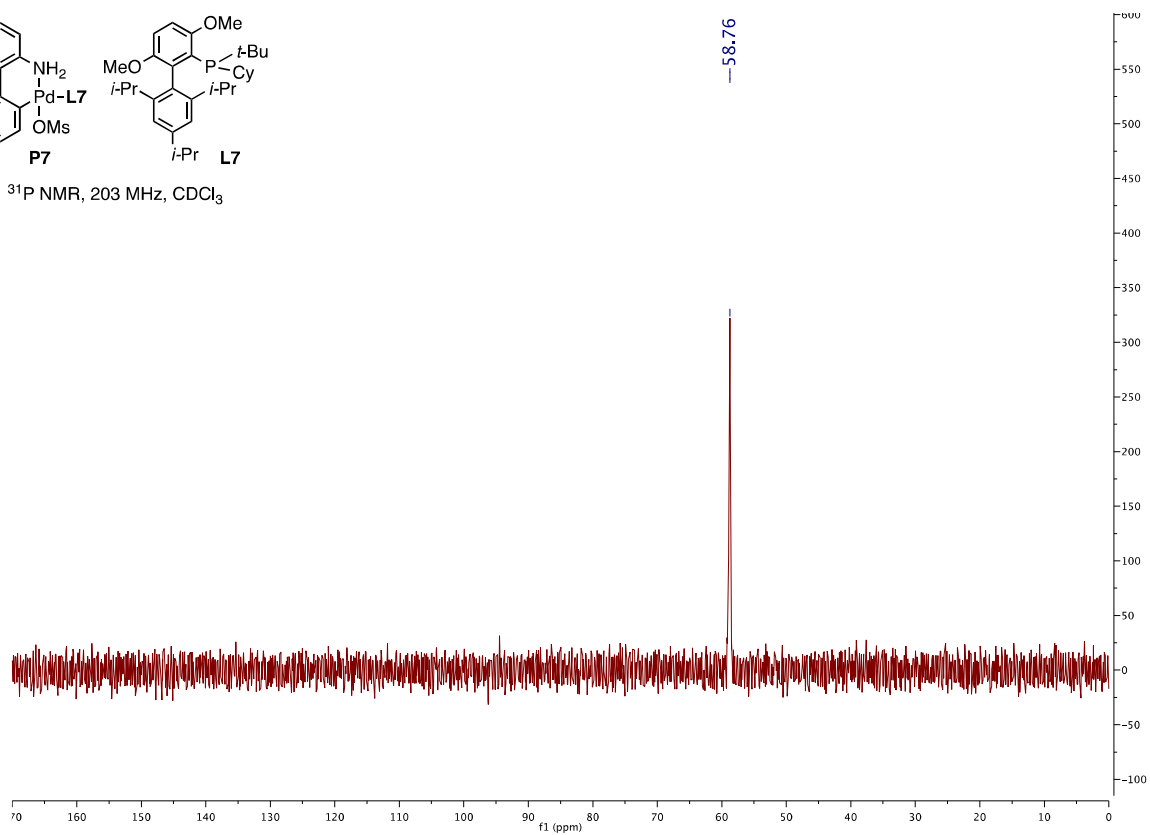



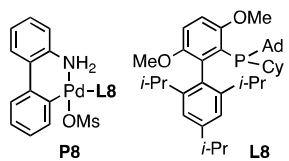

$^{31}\text{P}$  NMR, 203 MHz,  $\text{CDCl}_3$

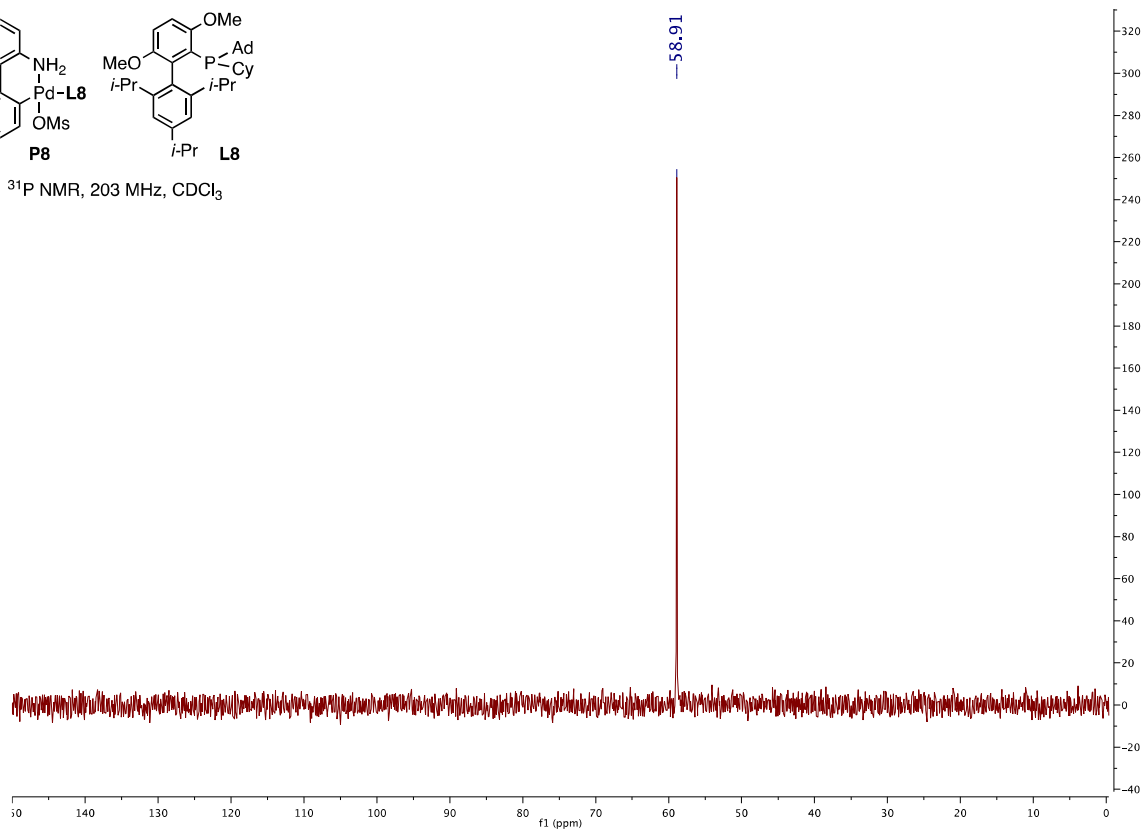

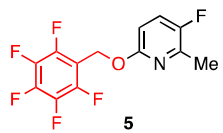

$^1\text{H NMR}$ , 500 MHz,  $\text{CDCl}_3$

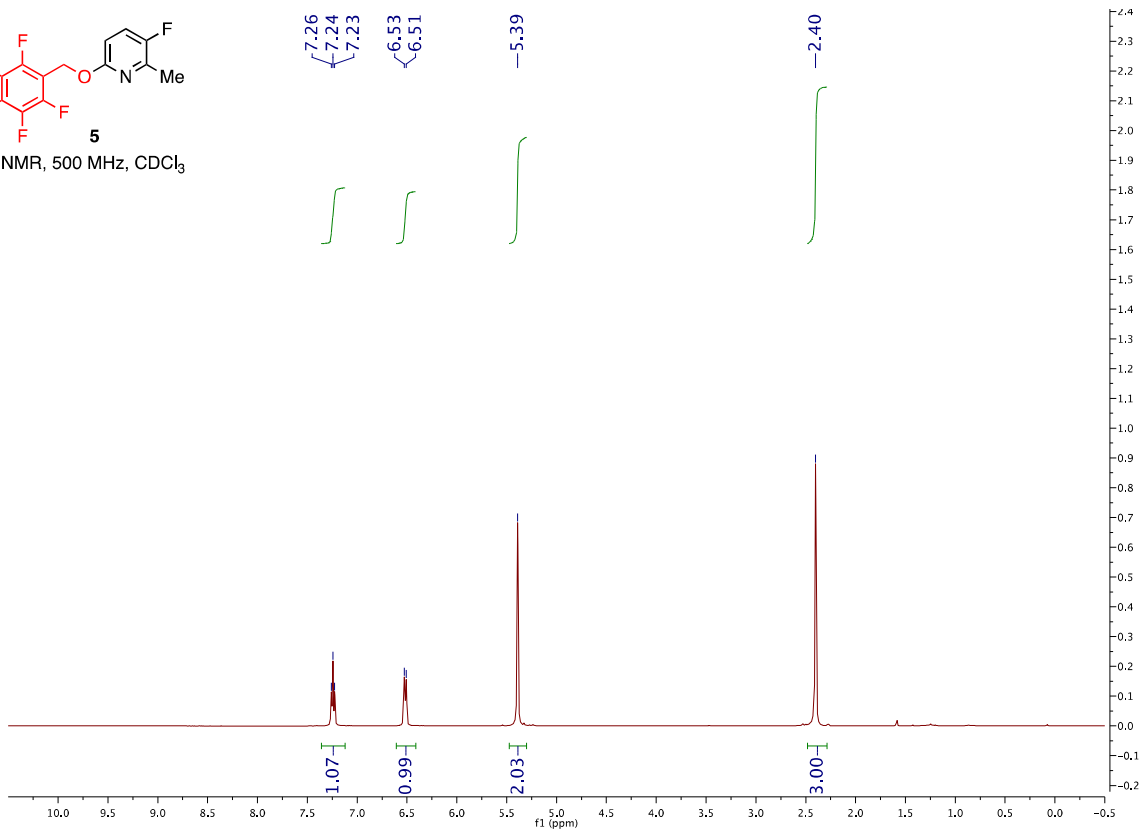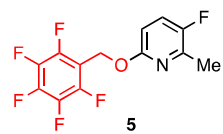

$^{13}\text{C NMR}$ , 126 MHz,  $\text{CDCl}_3$

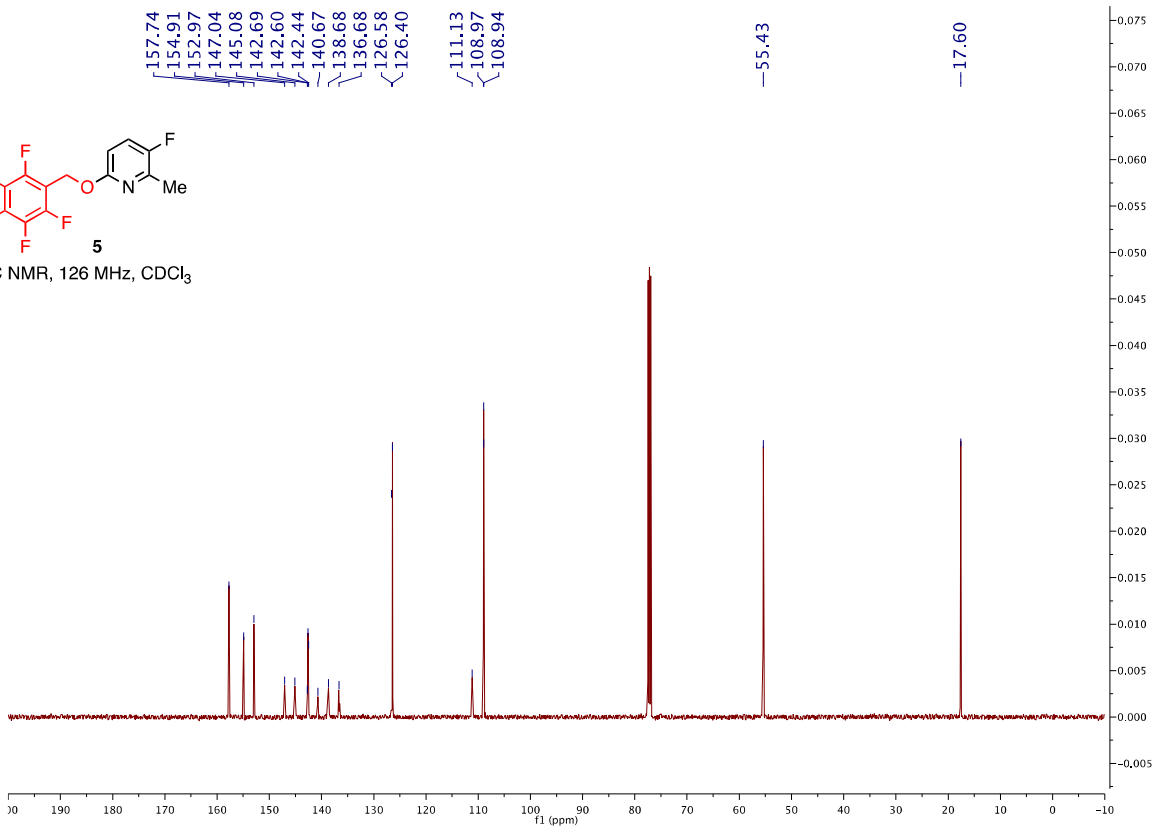



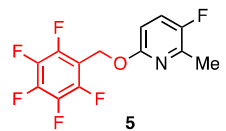

<sup>19</sup>F NMR, 470 MHz, CDCl<sub>3</sub>

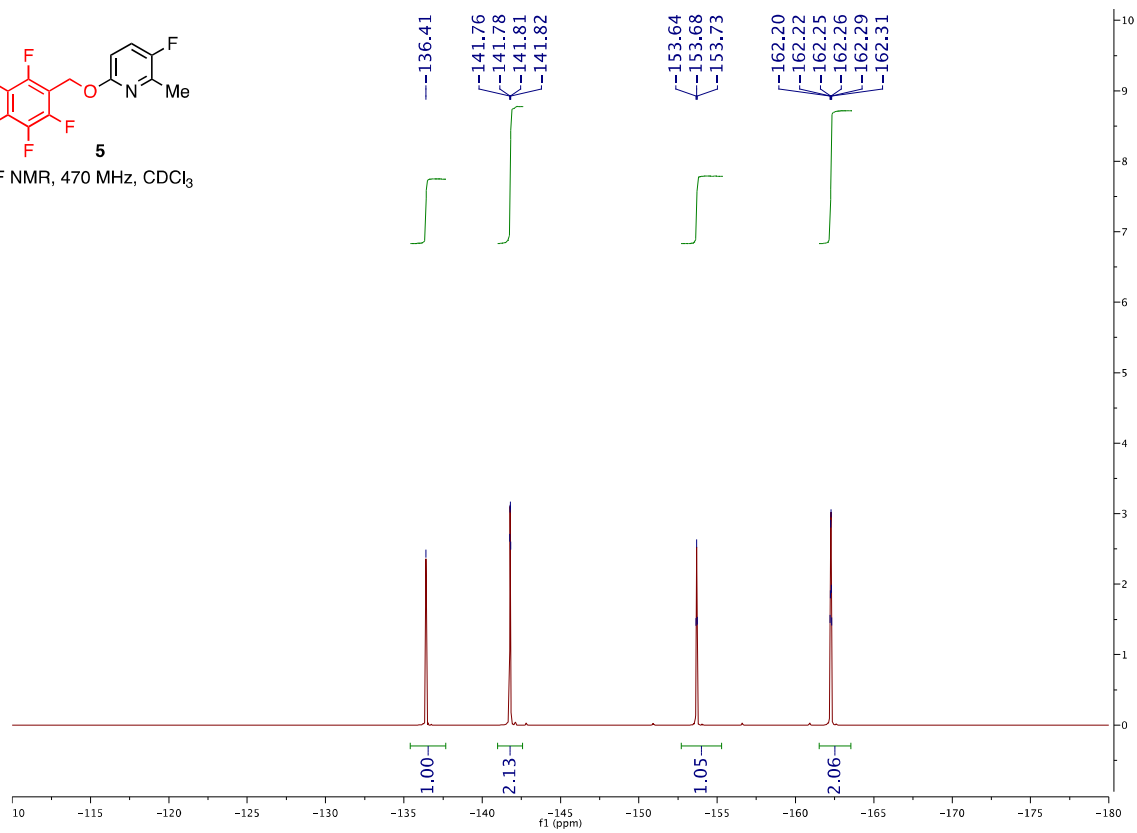

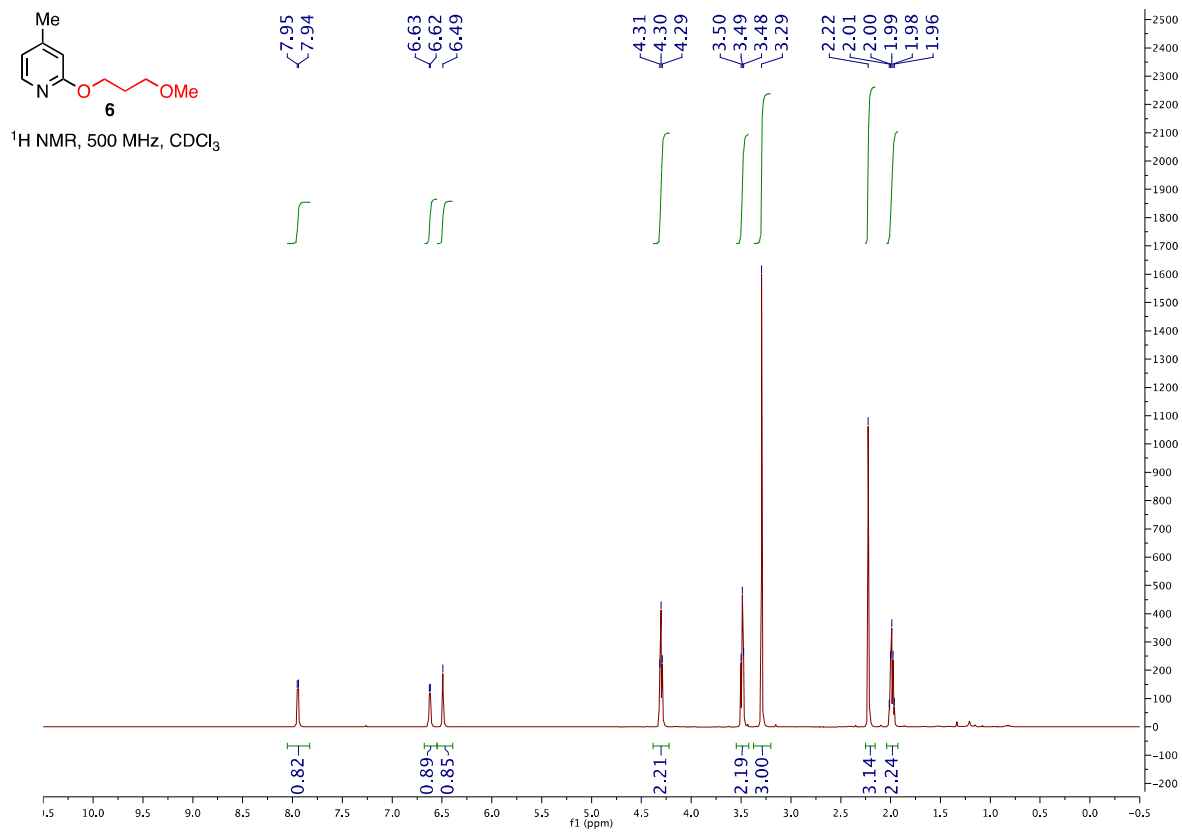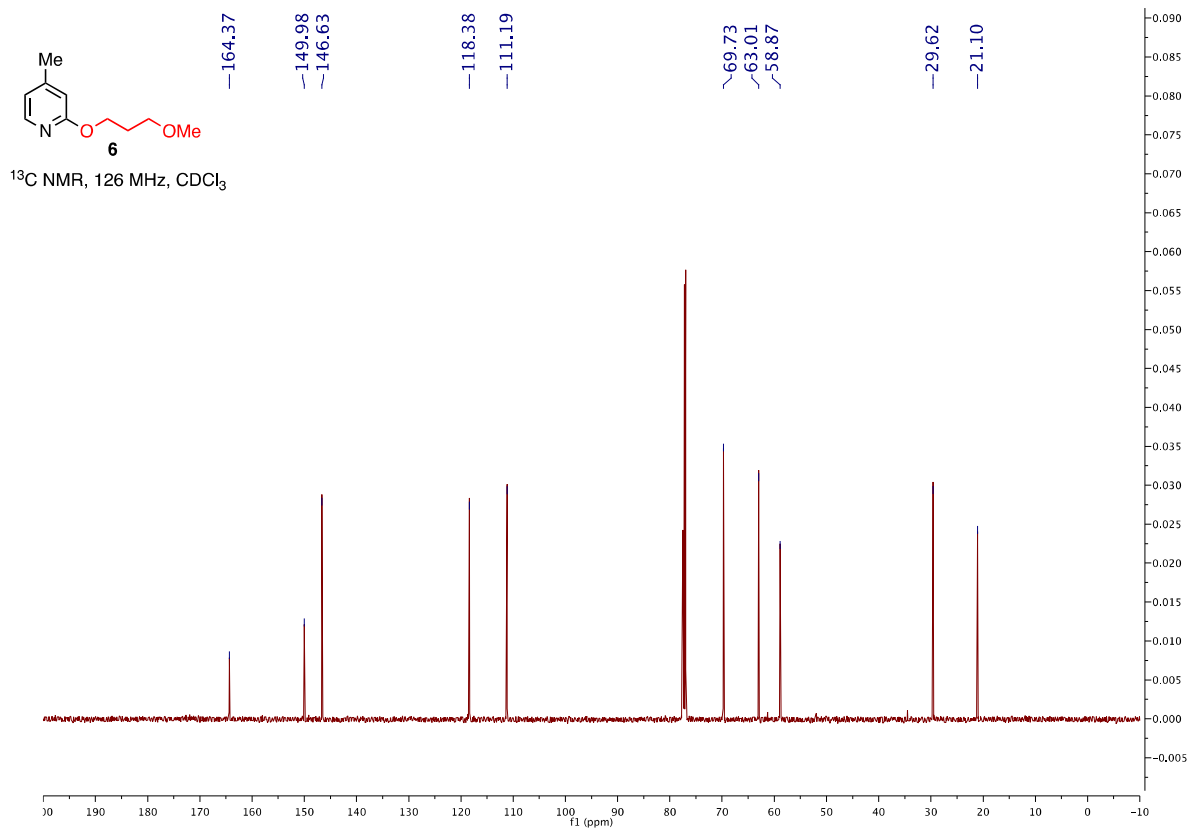

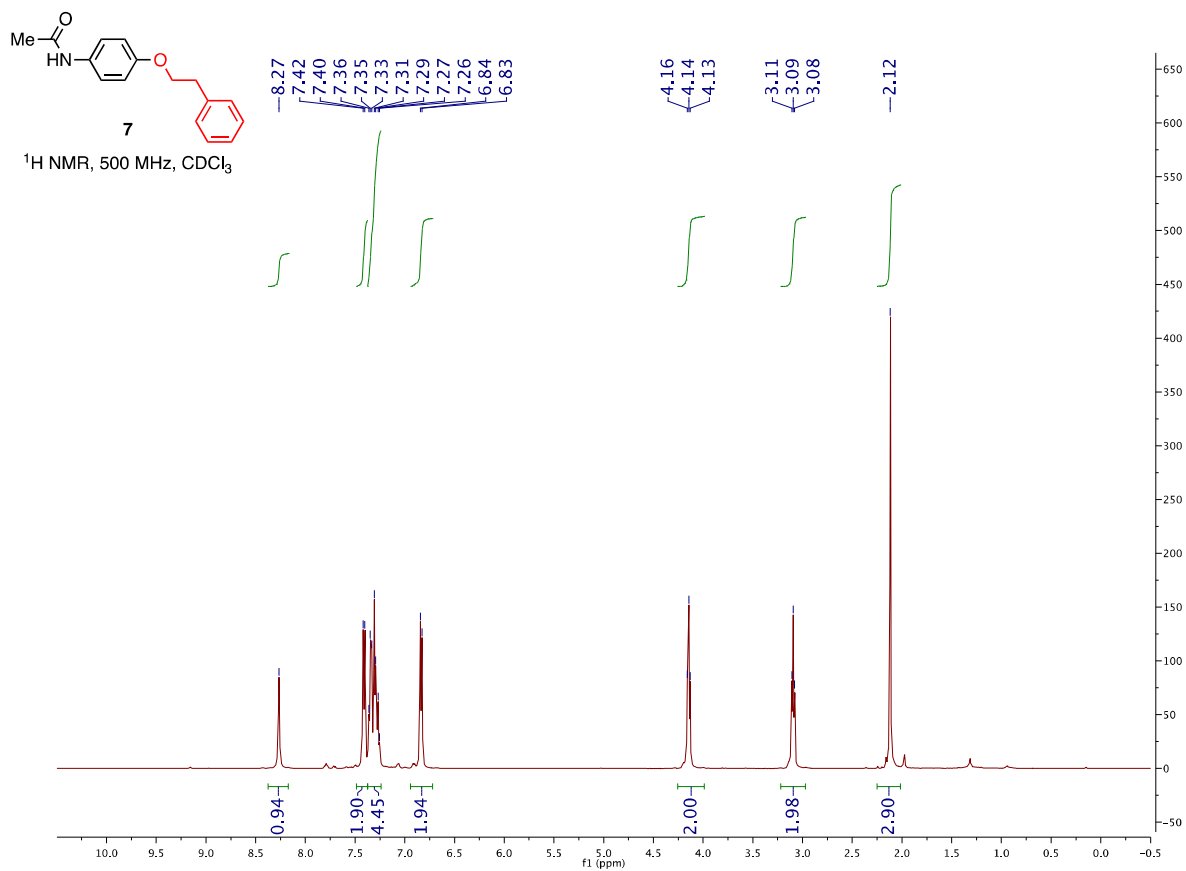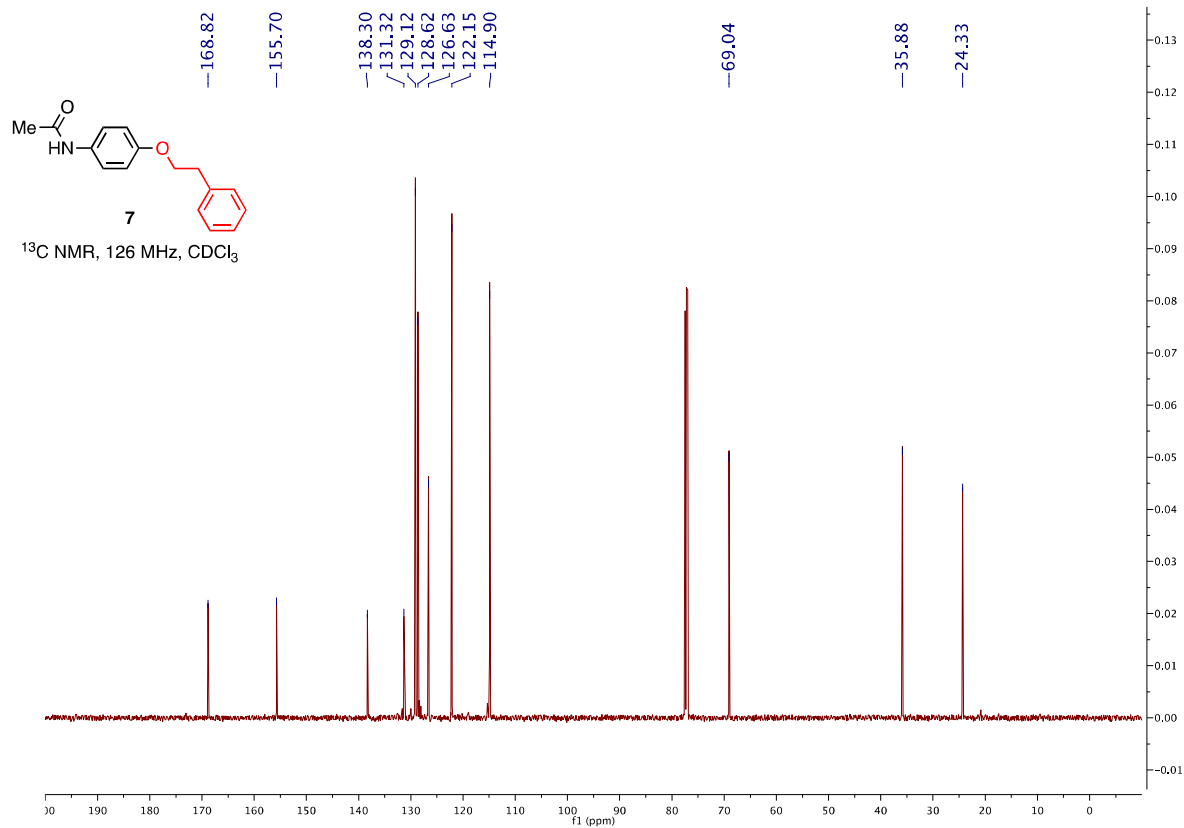

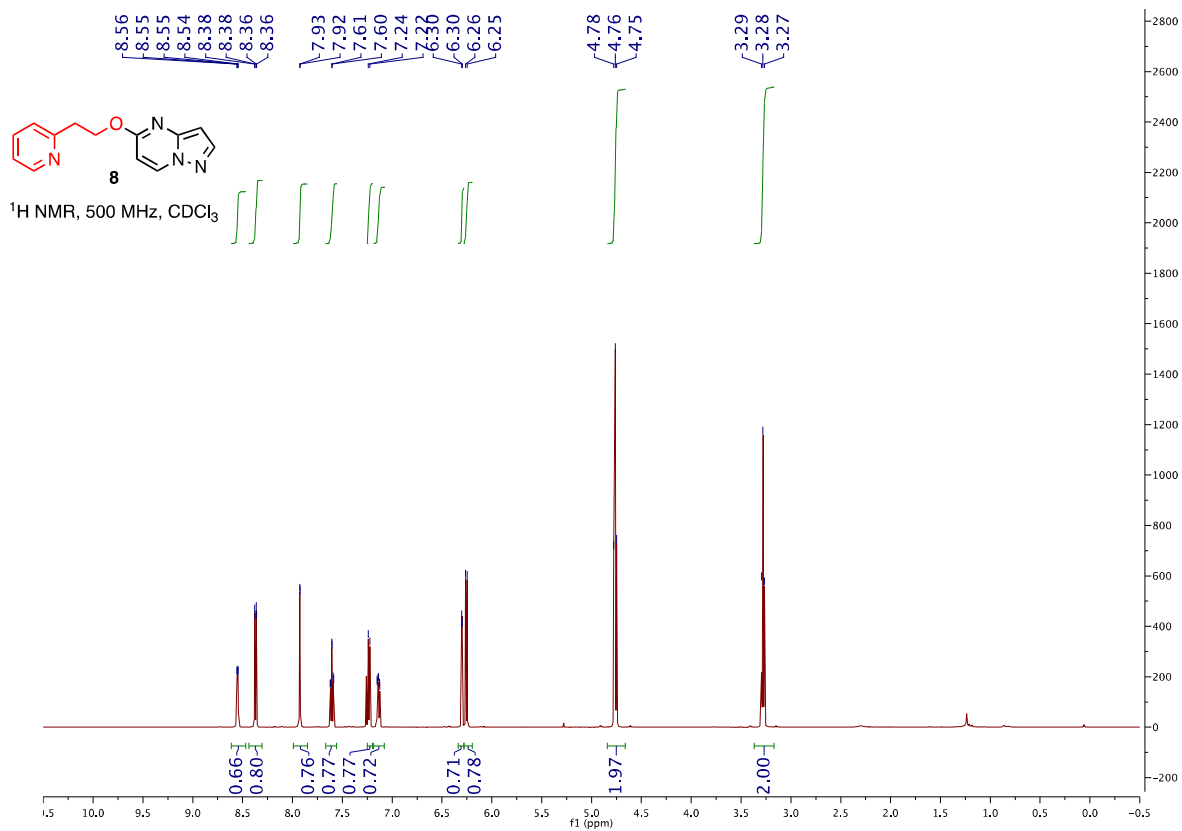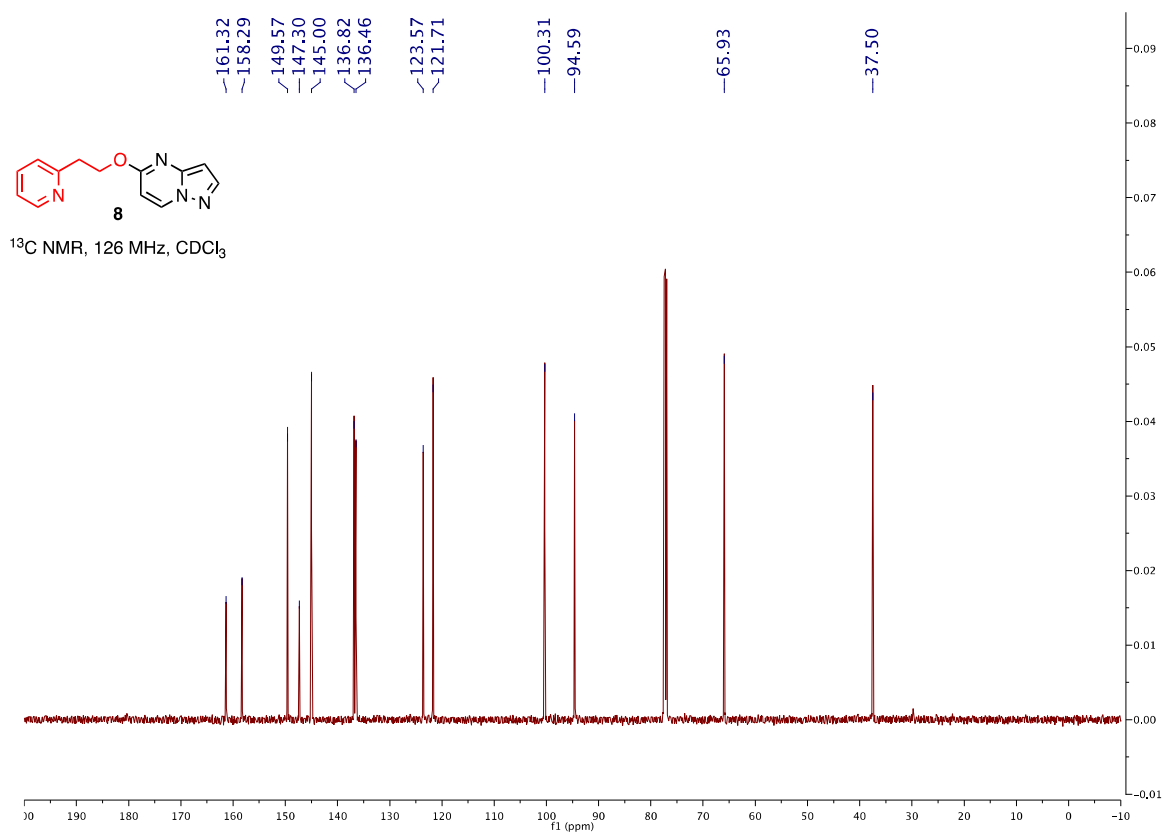

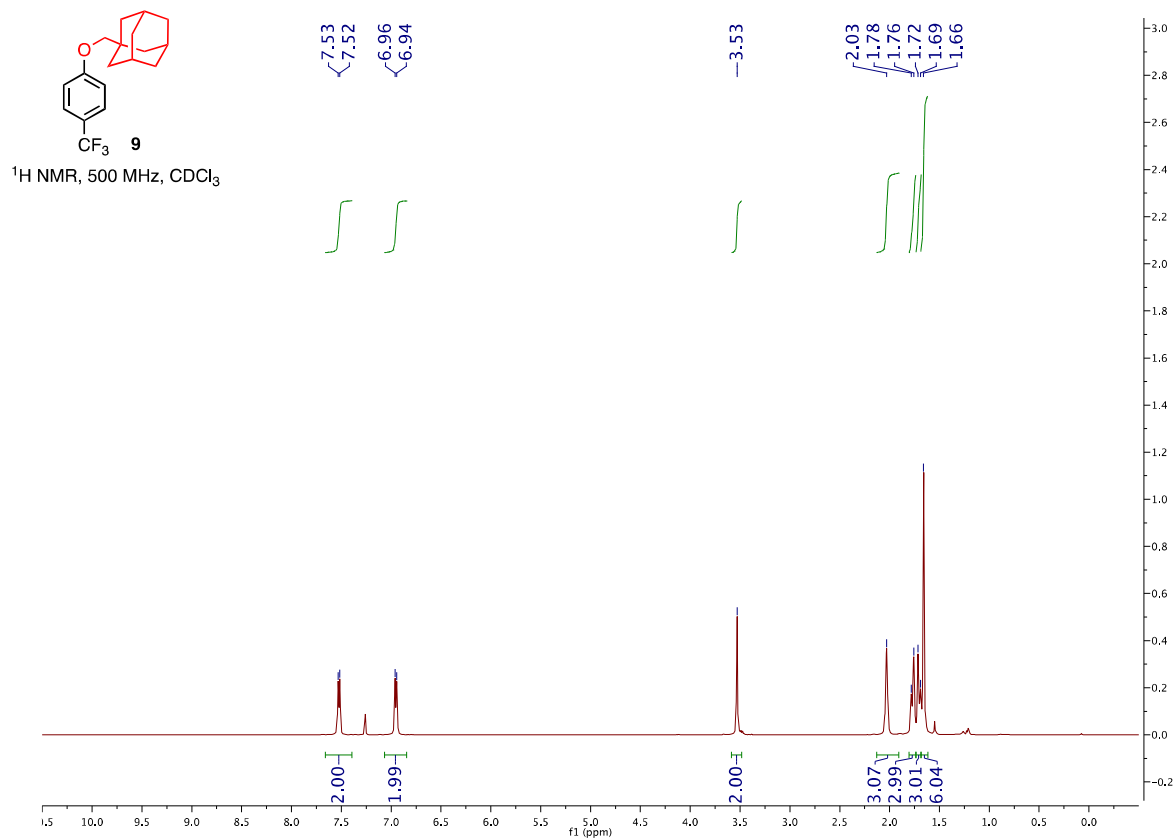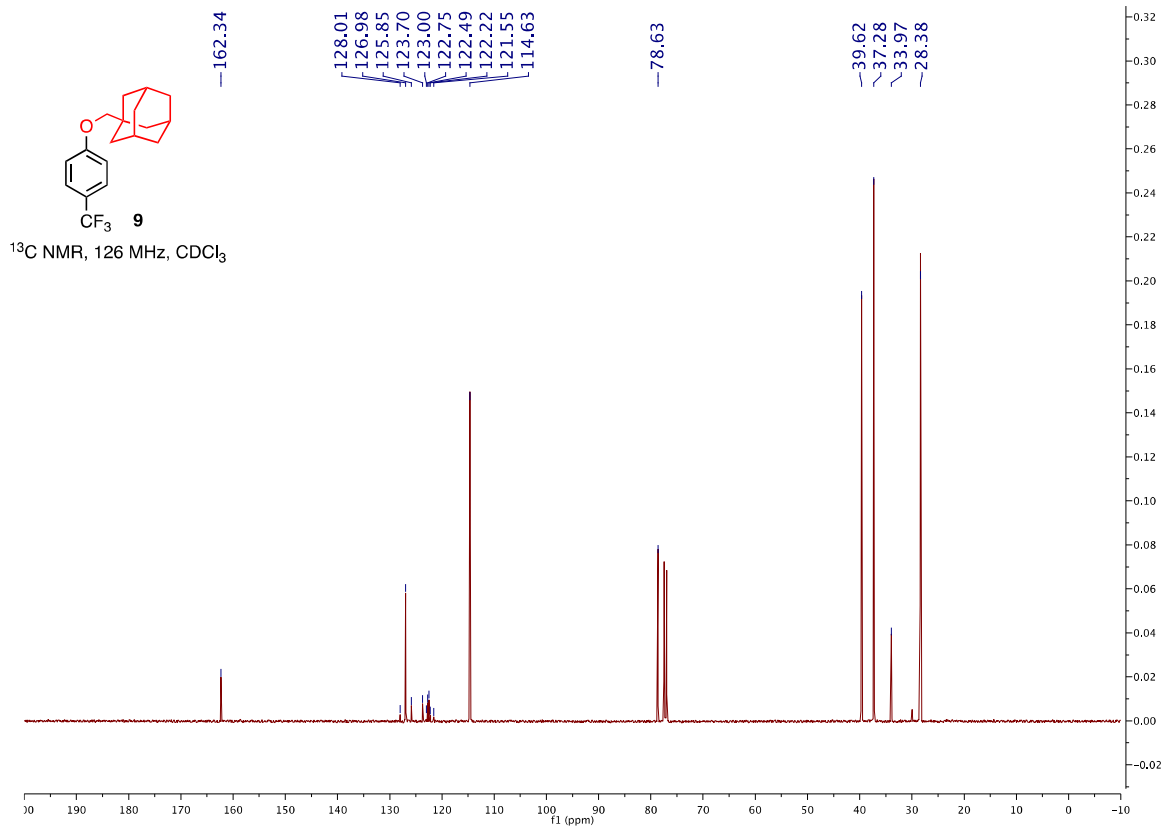

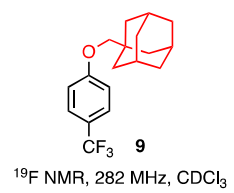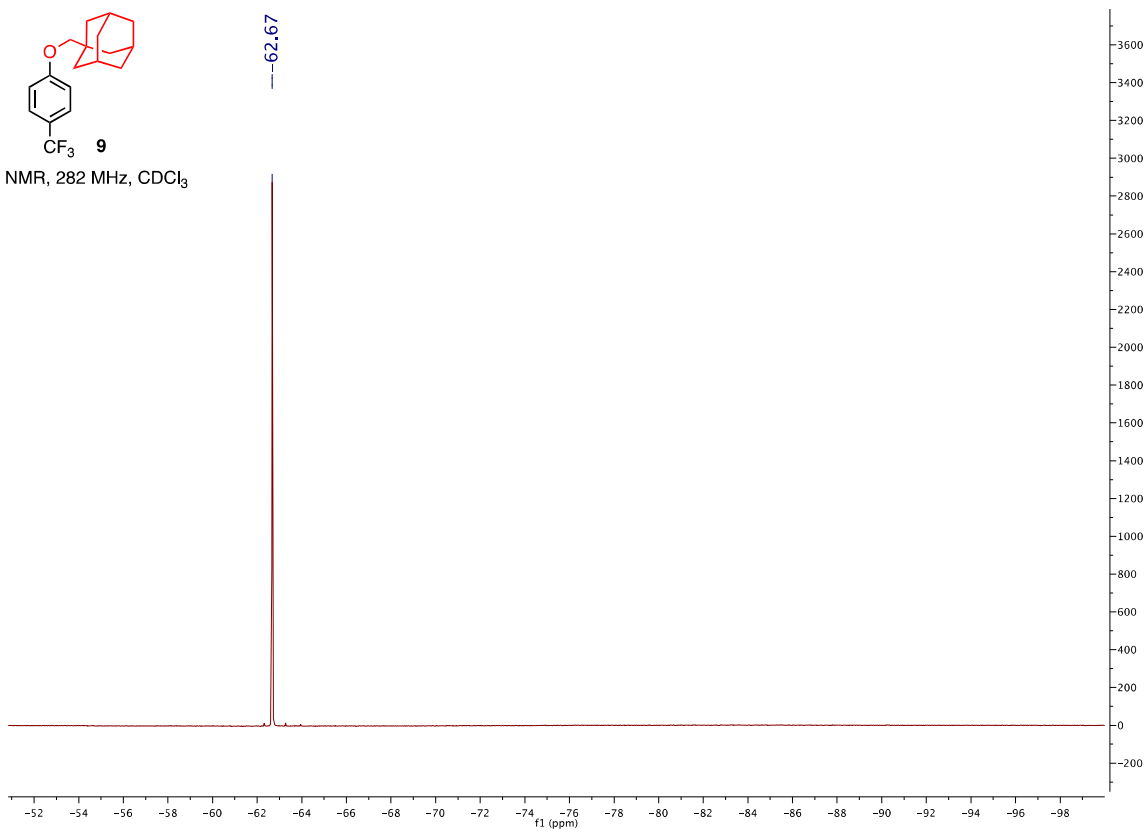

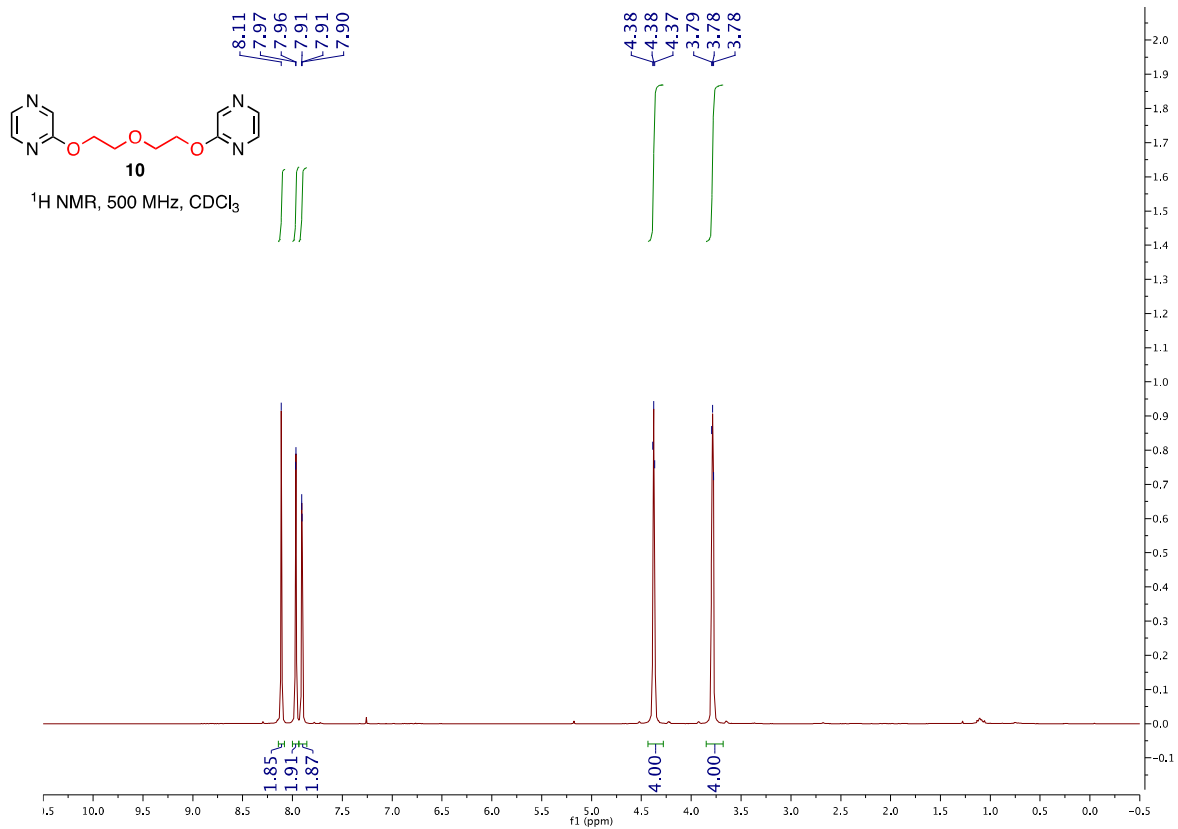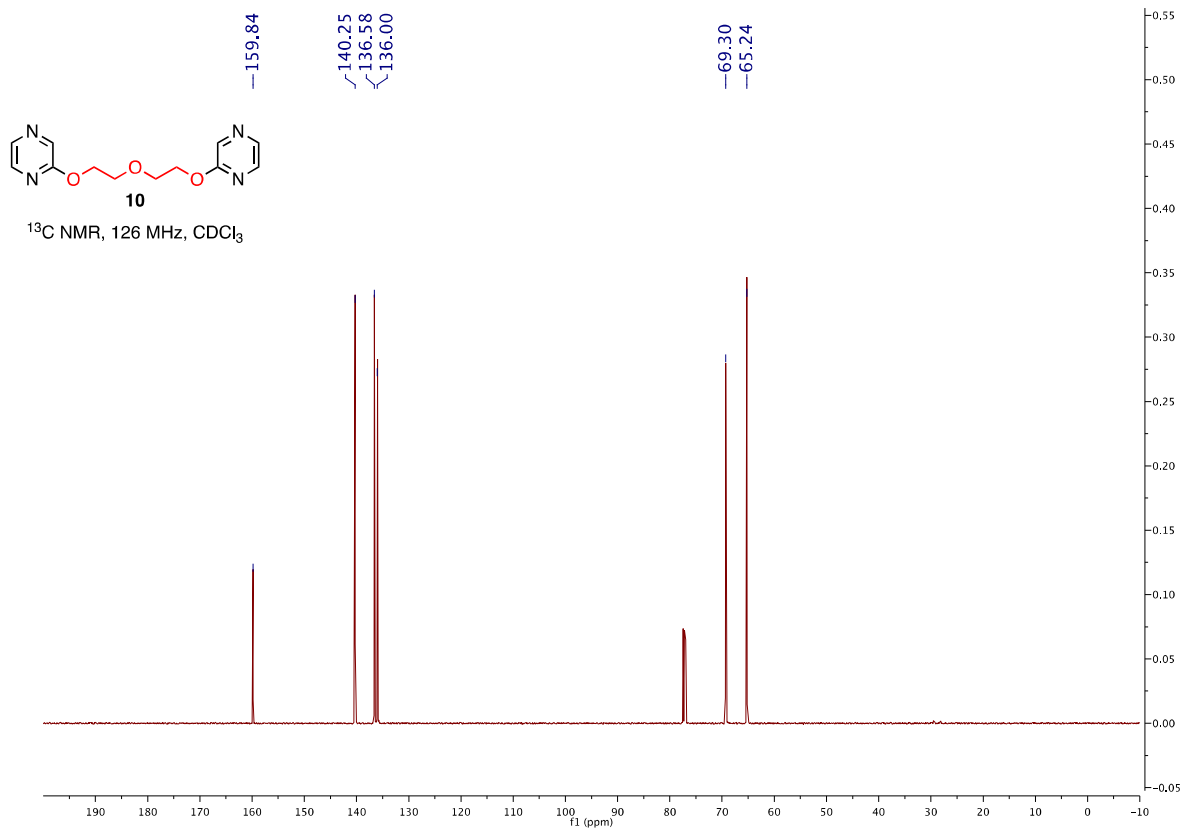

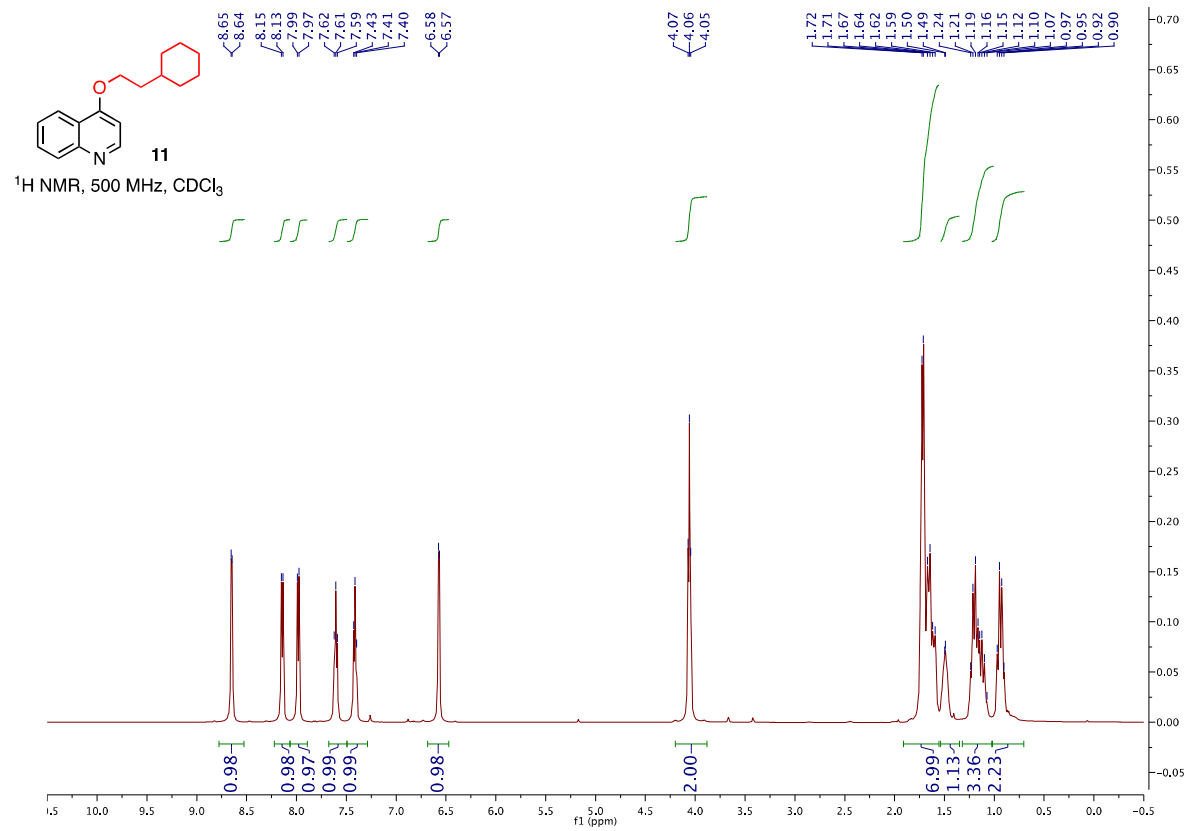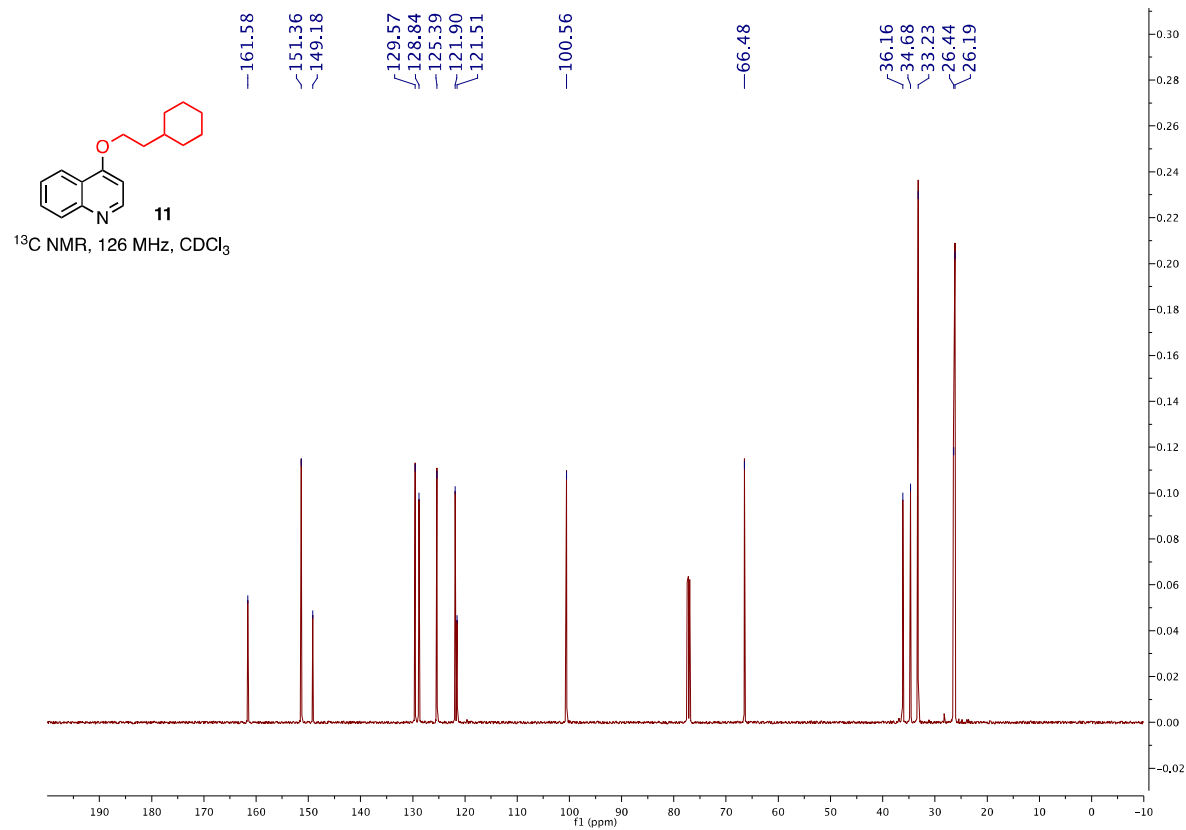



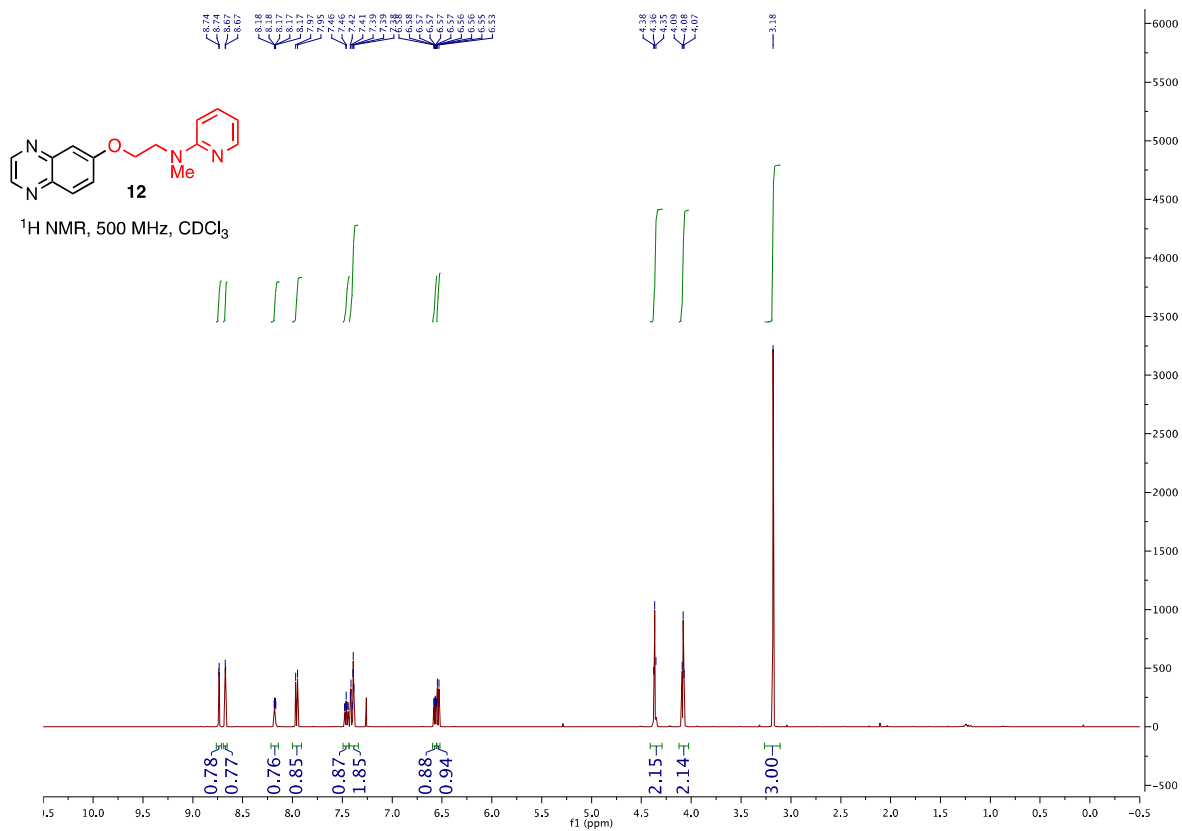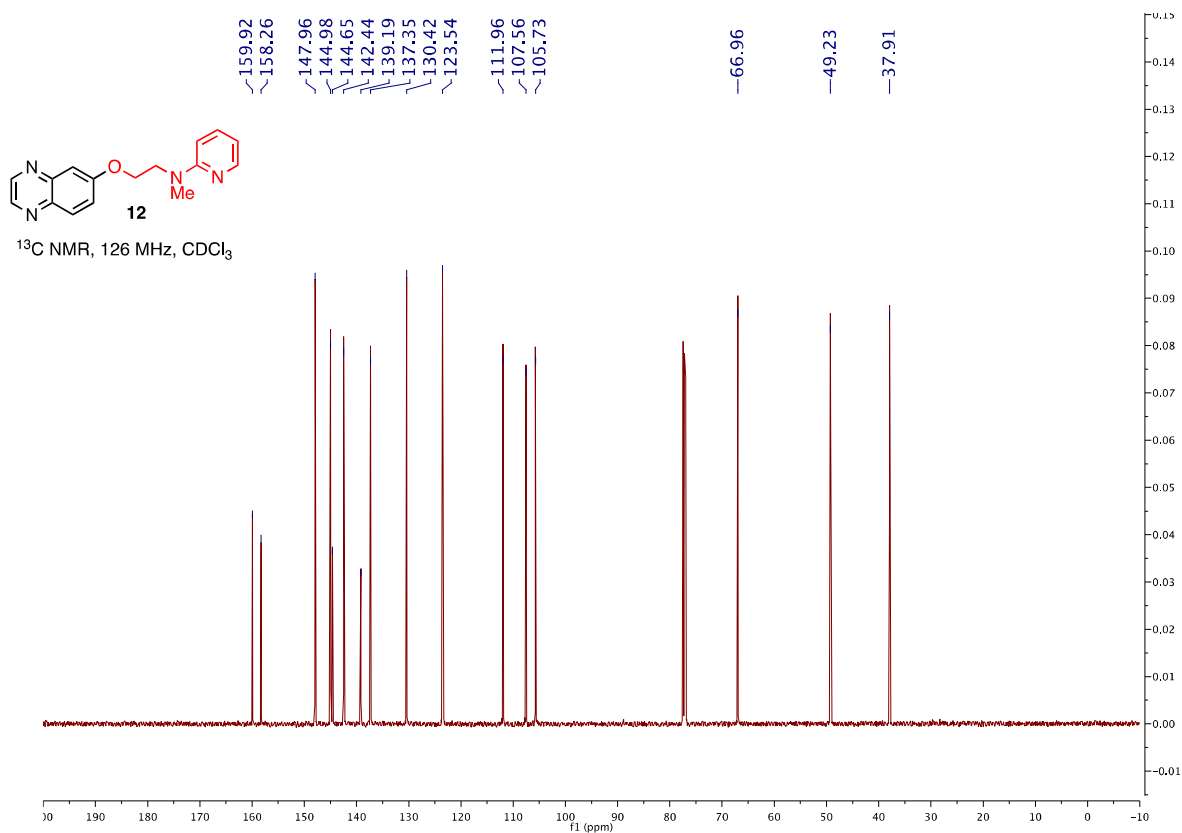

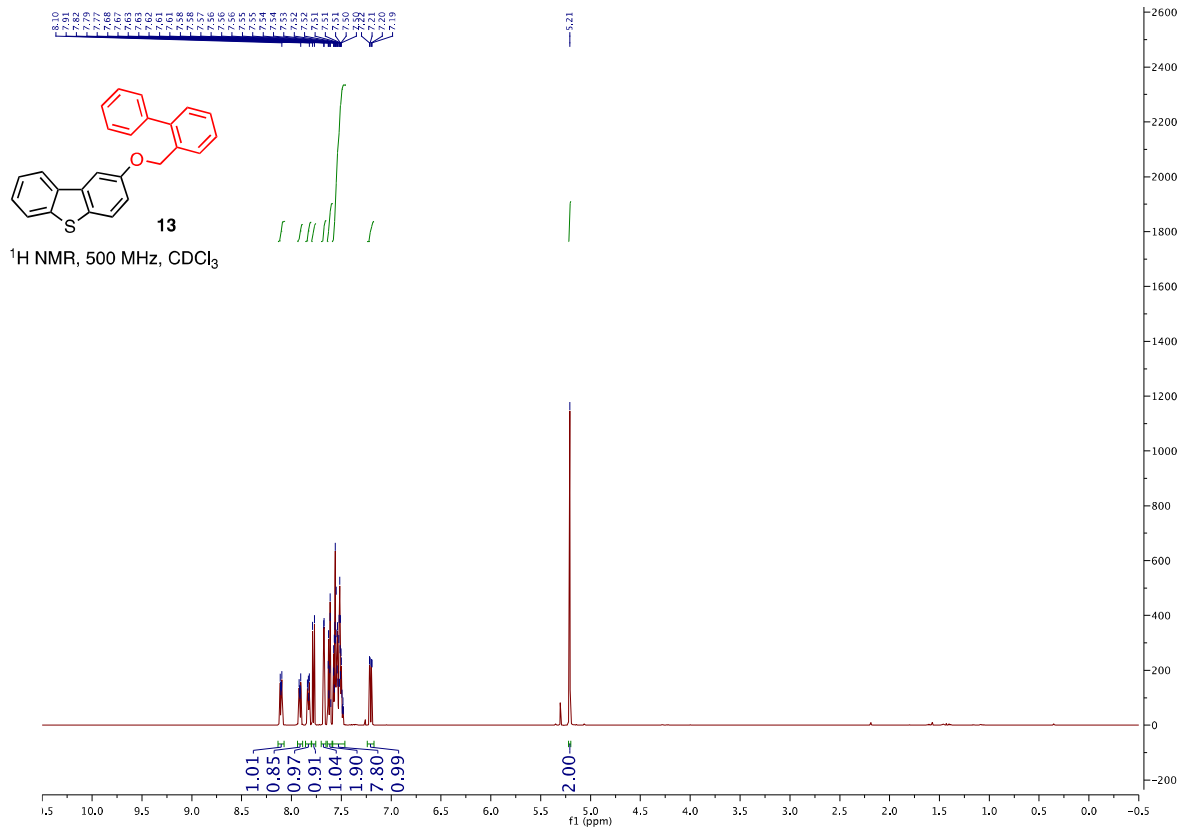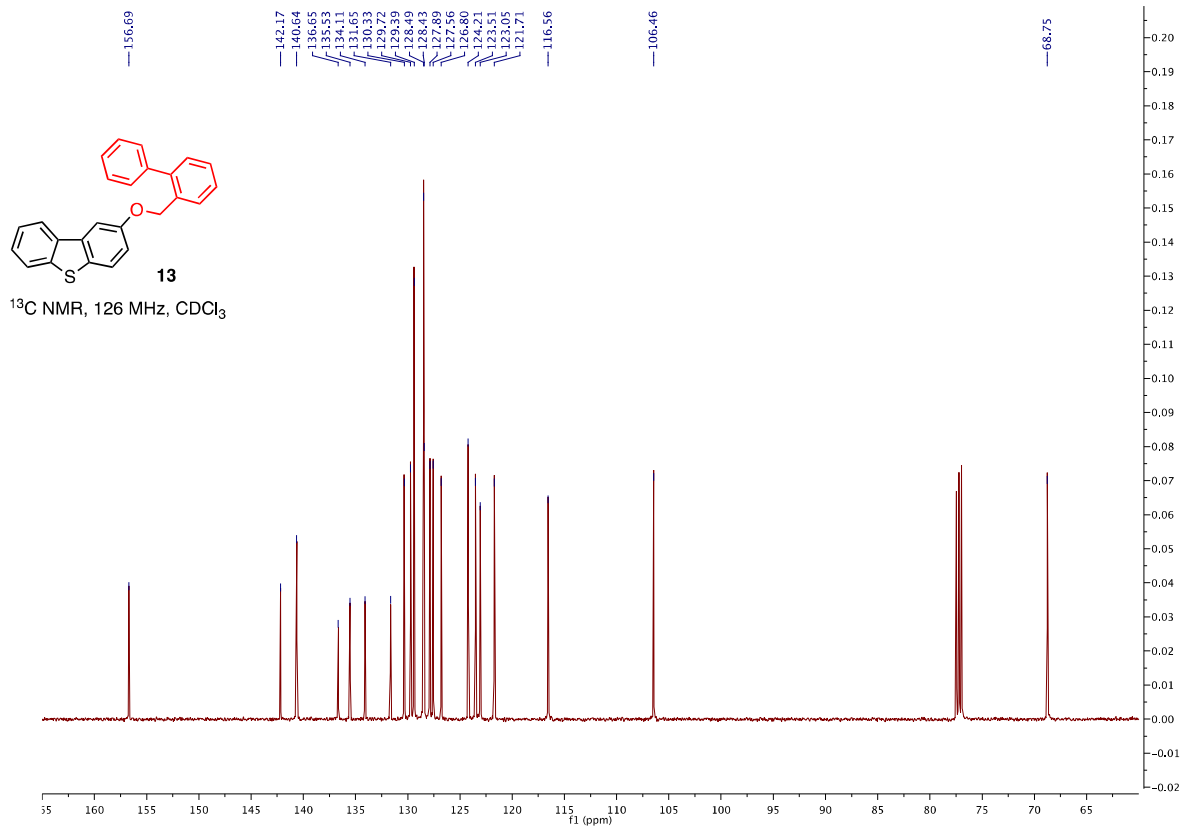

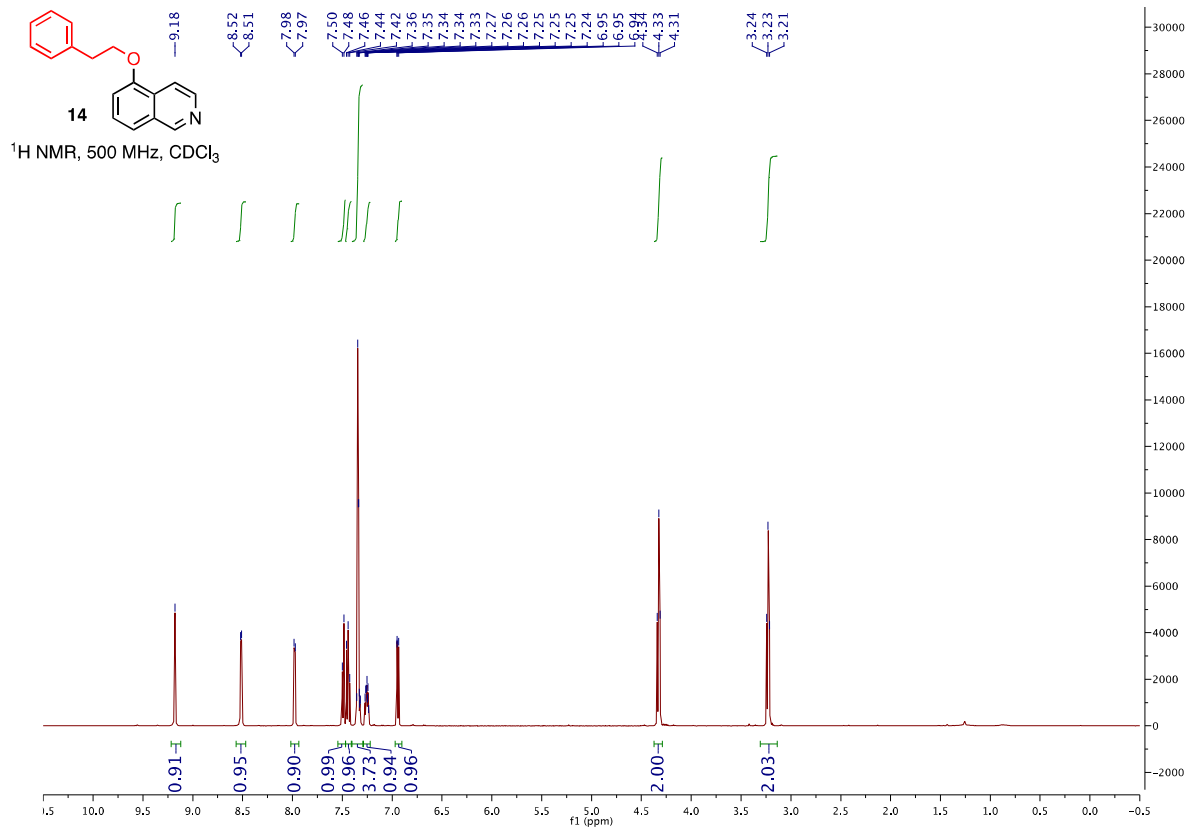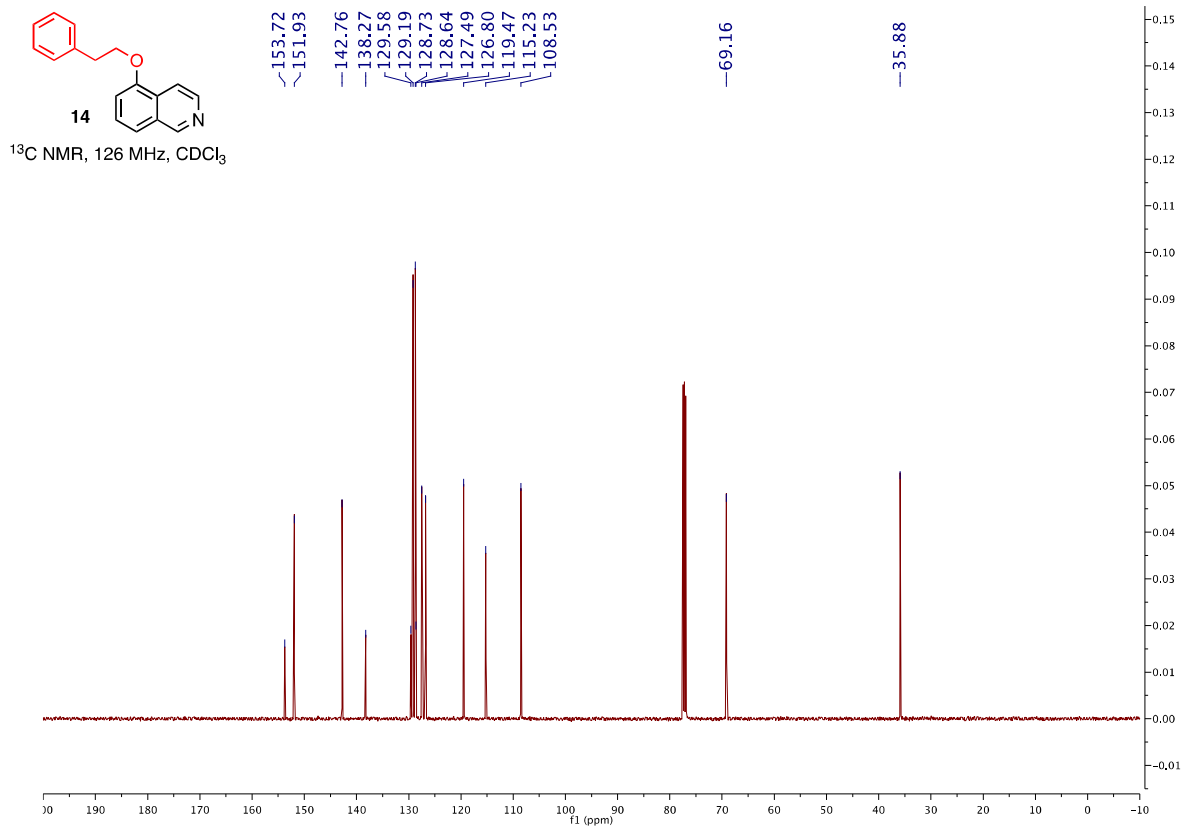

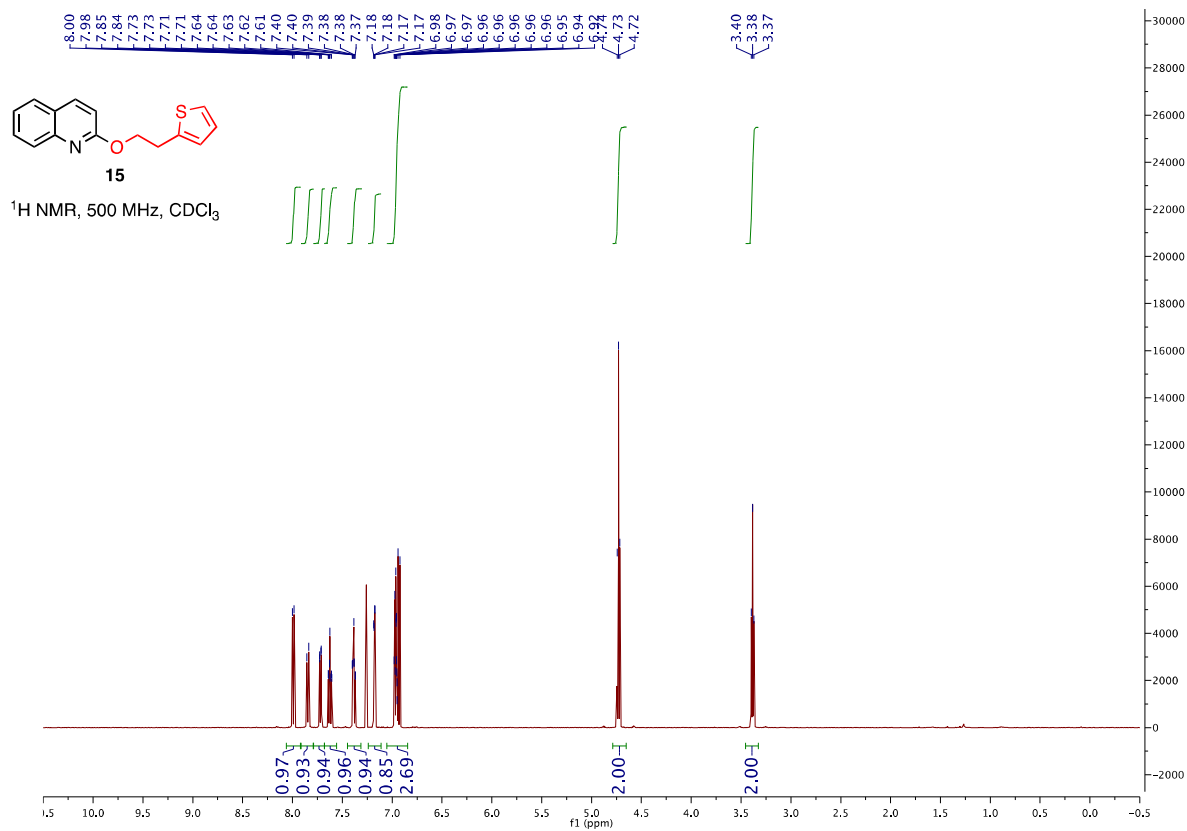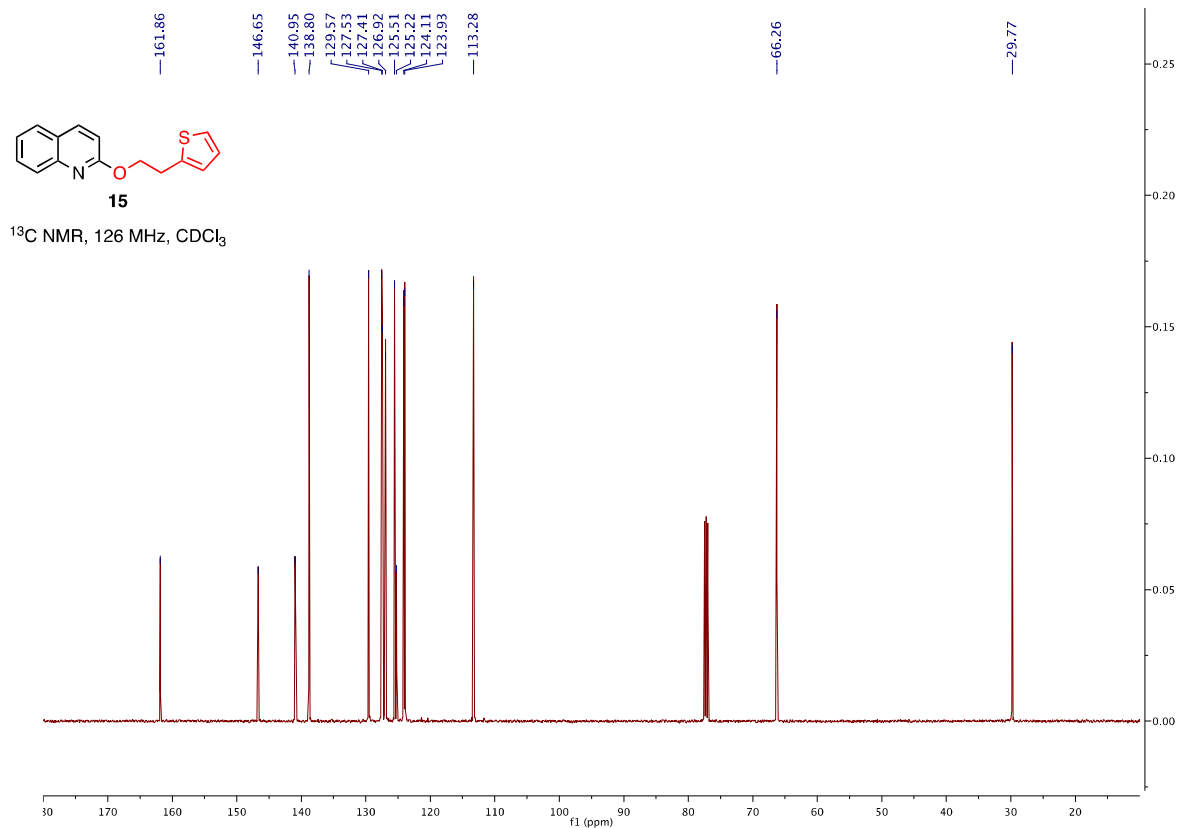

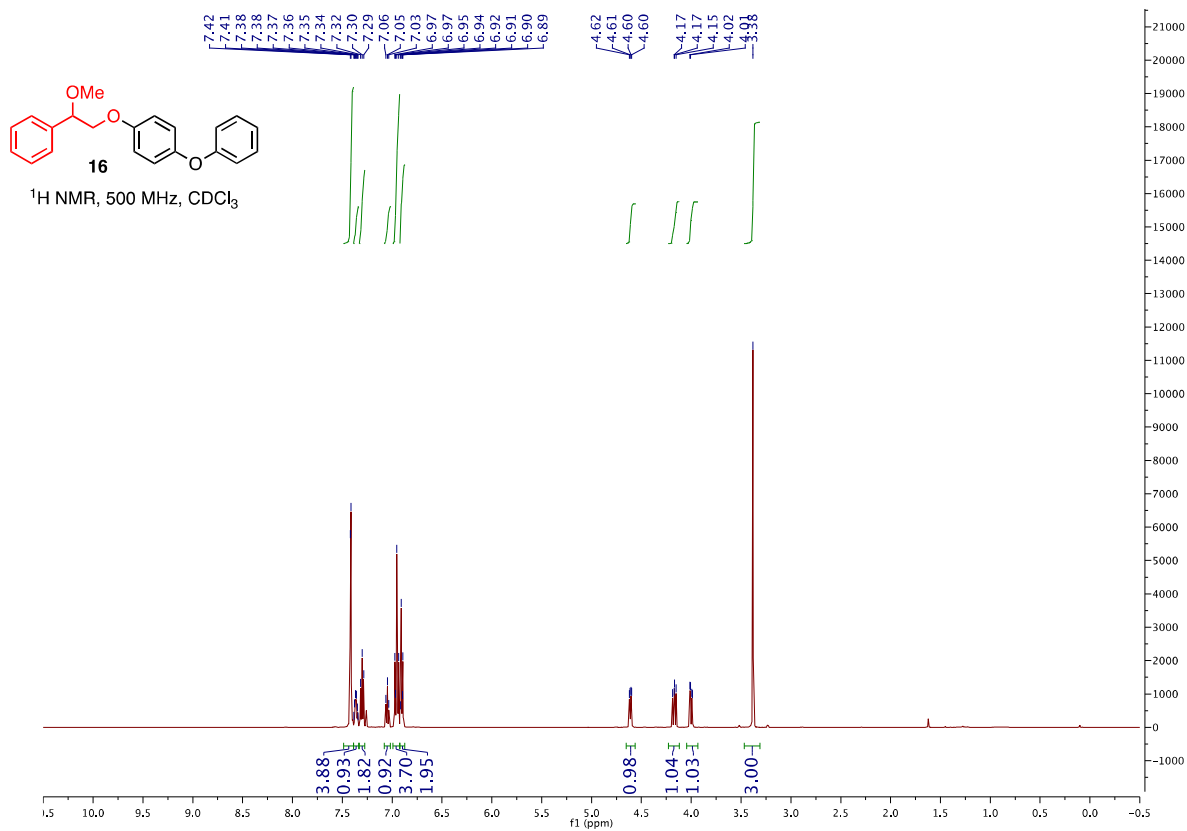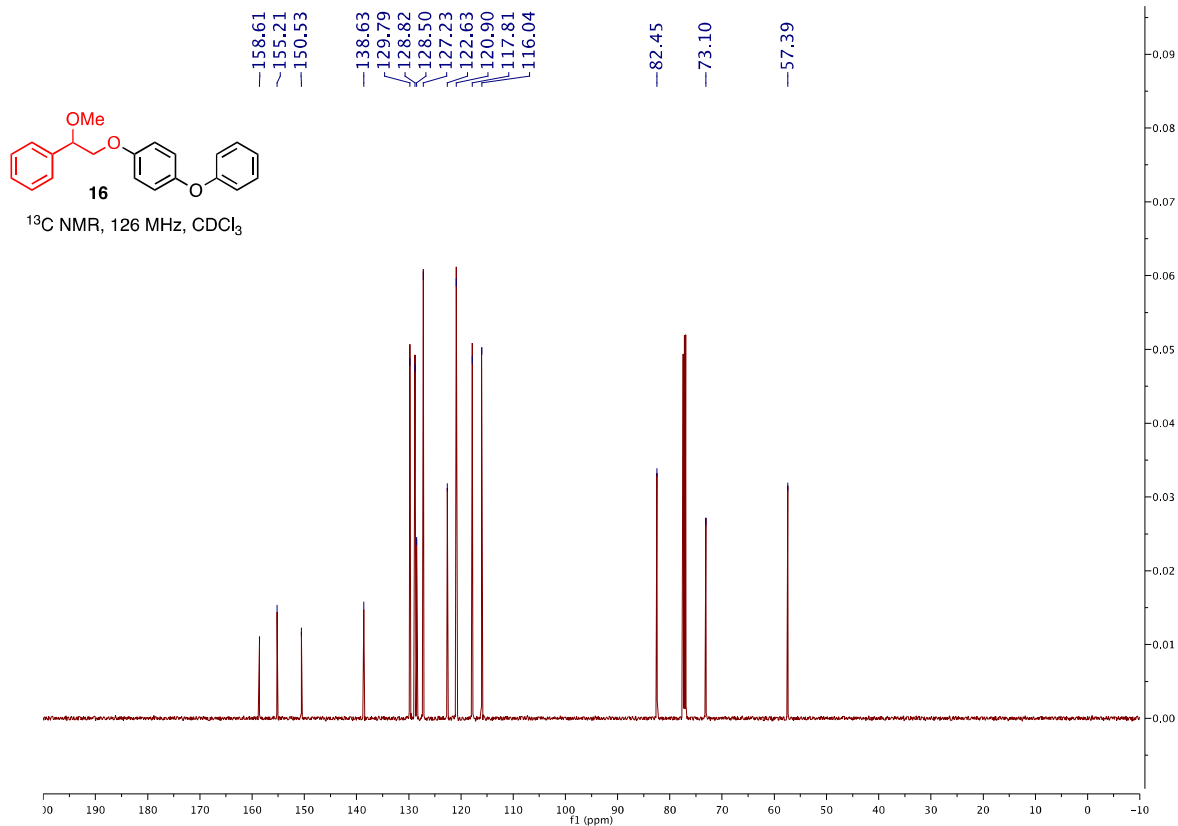

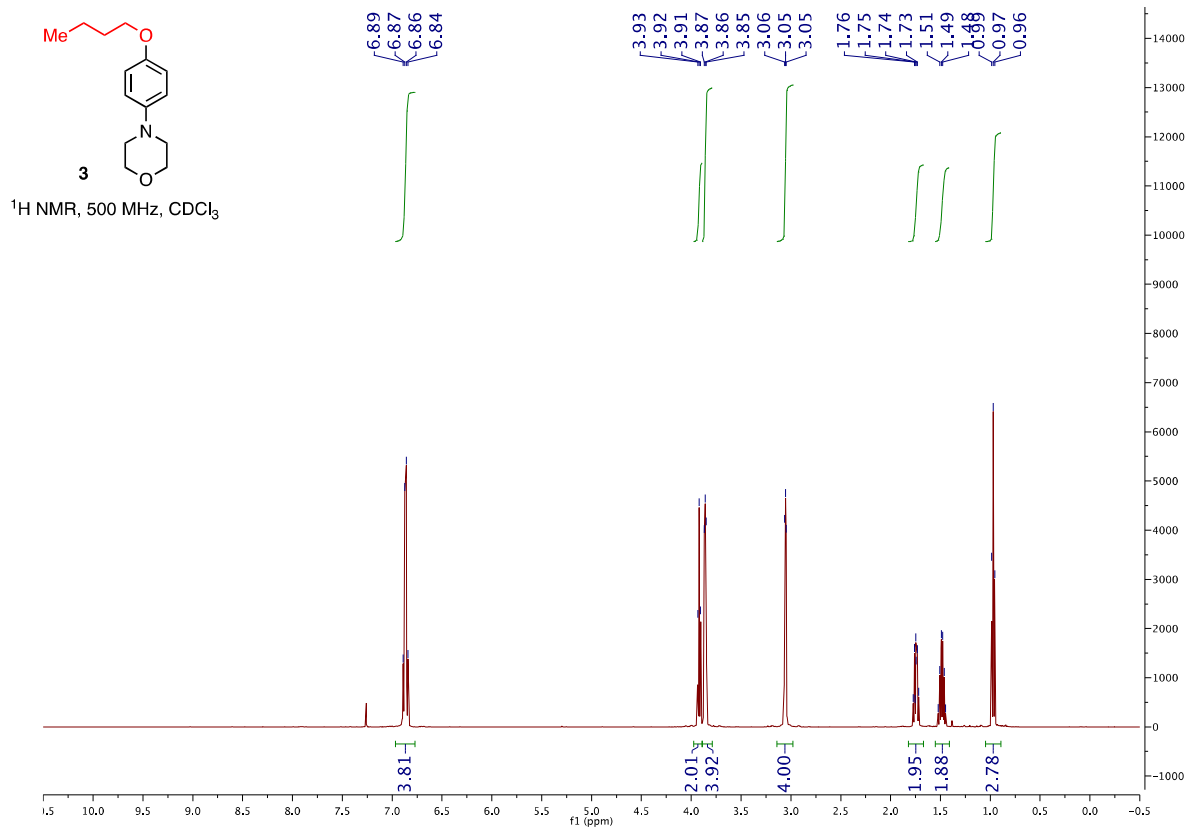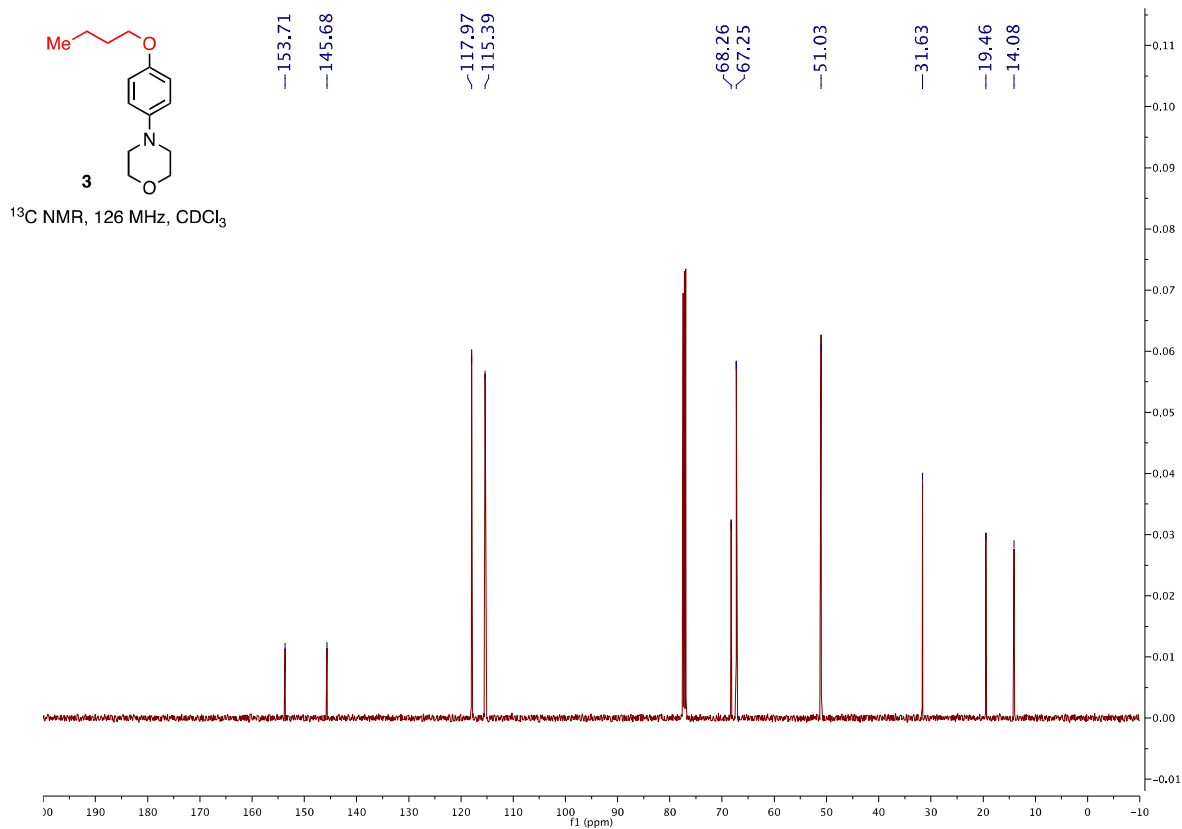

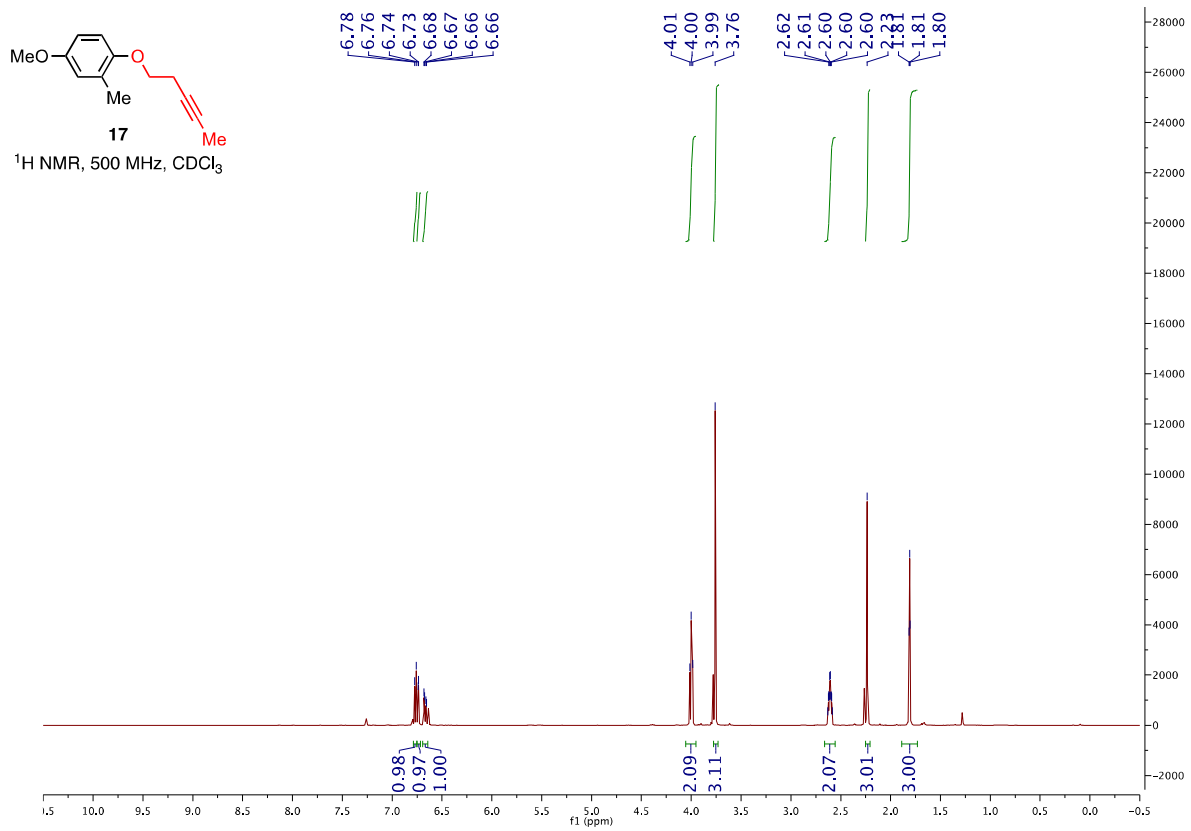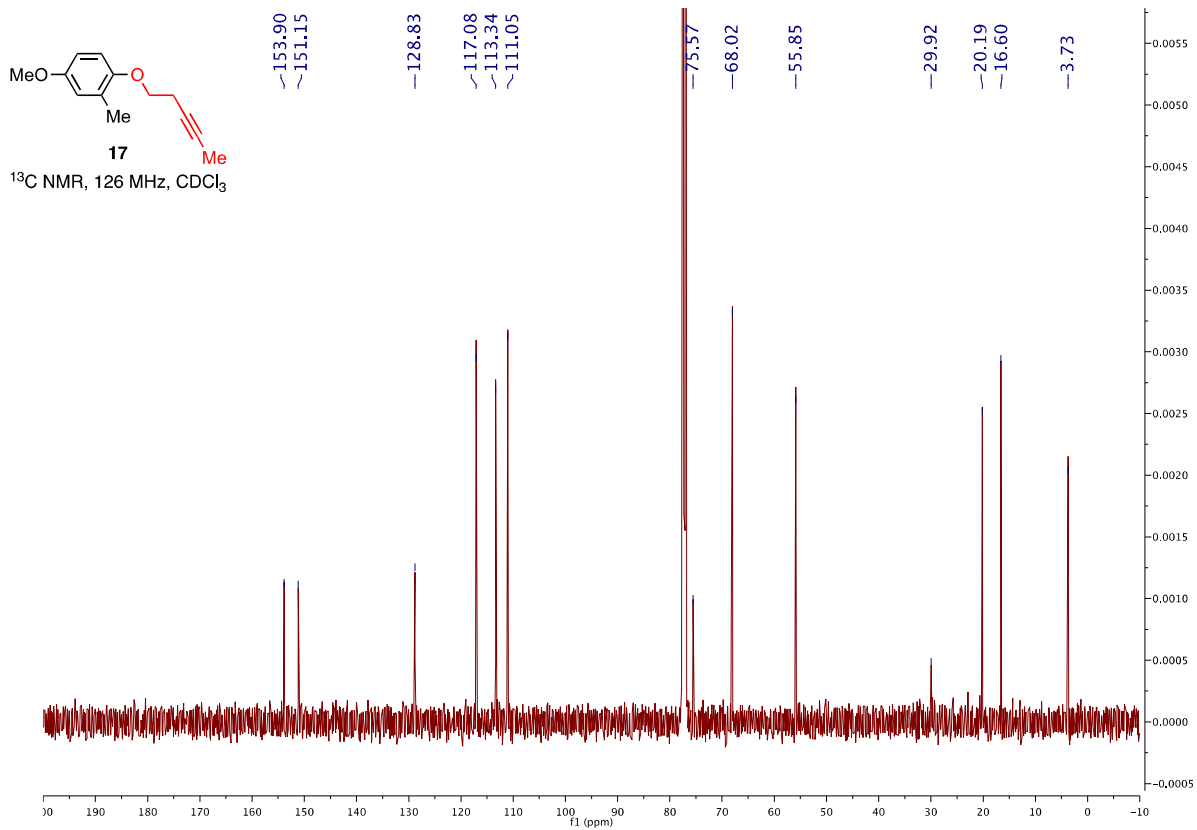

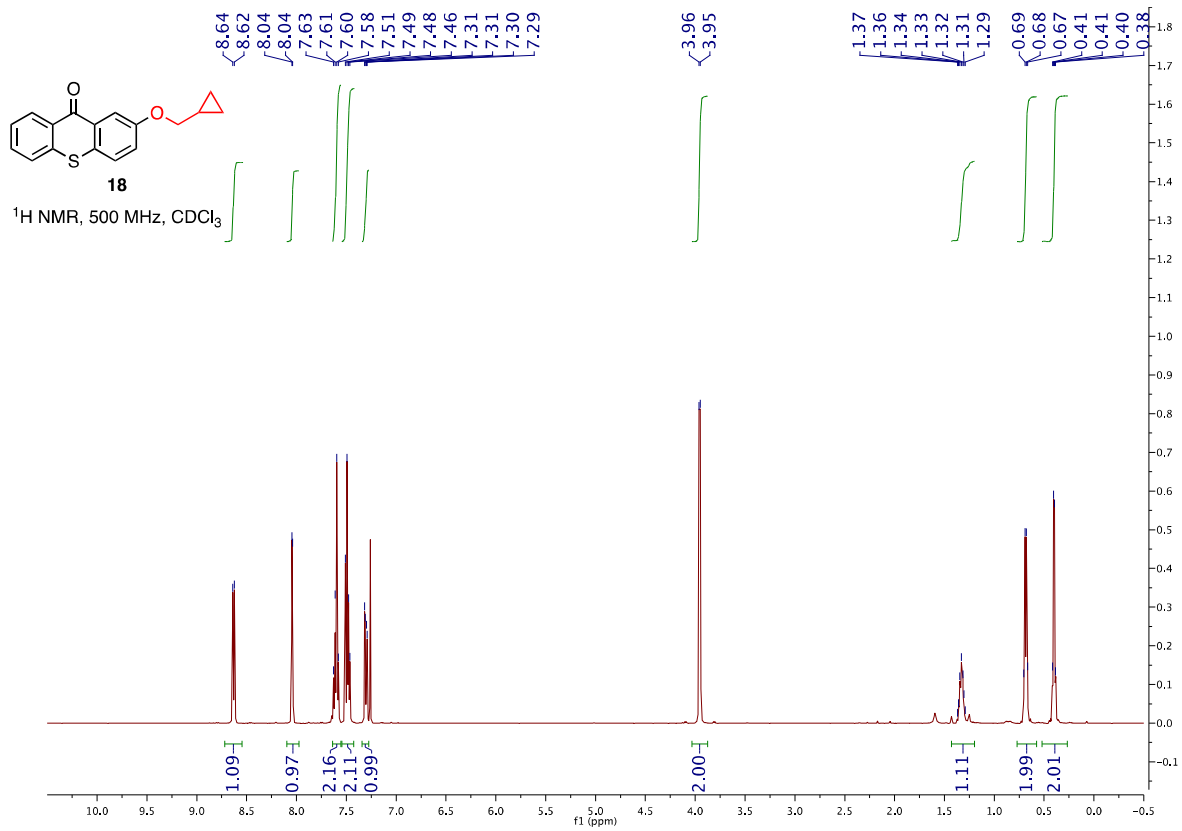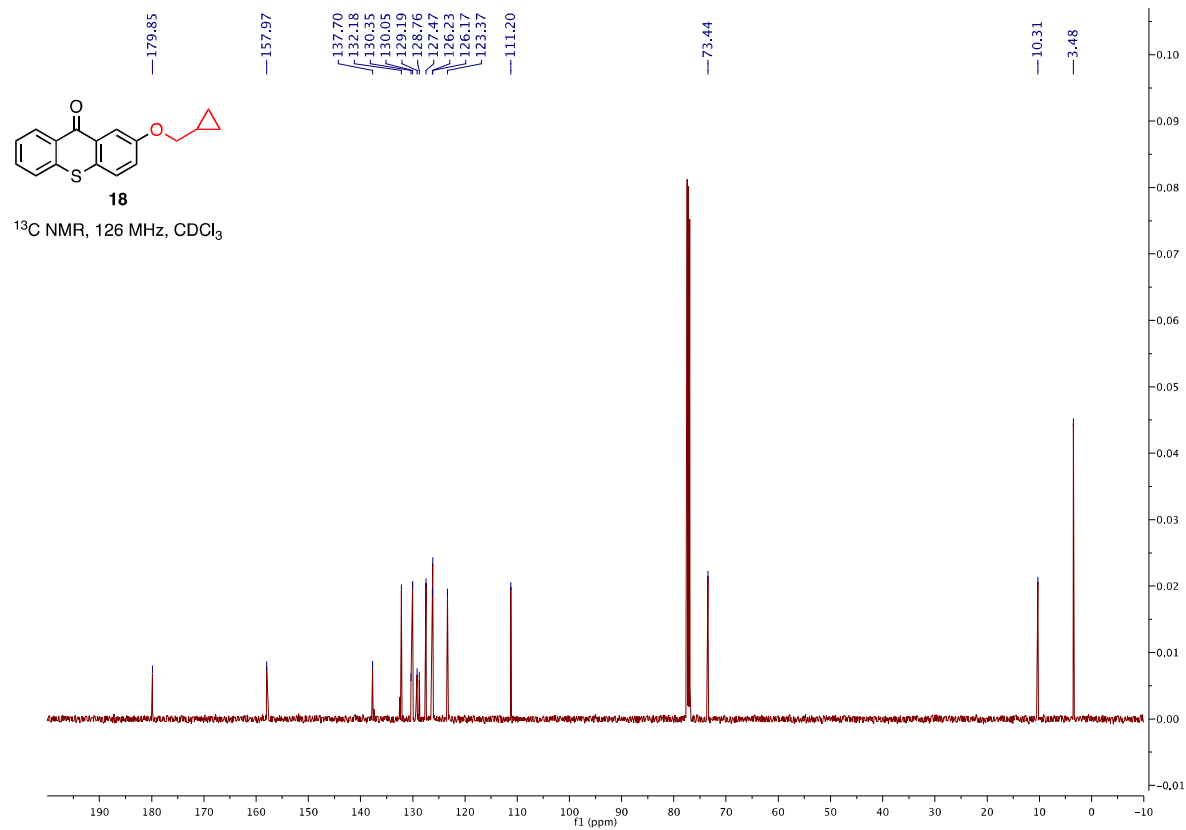



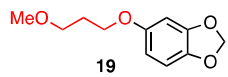

<sup>1</sup>H NMR, 500 MHz, CDCl<sub>3</sub>

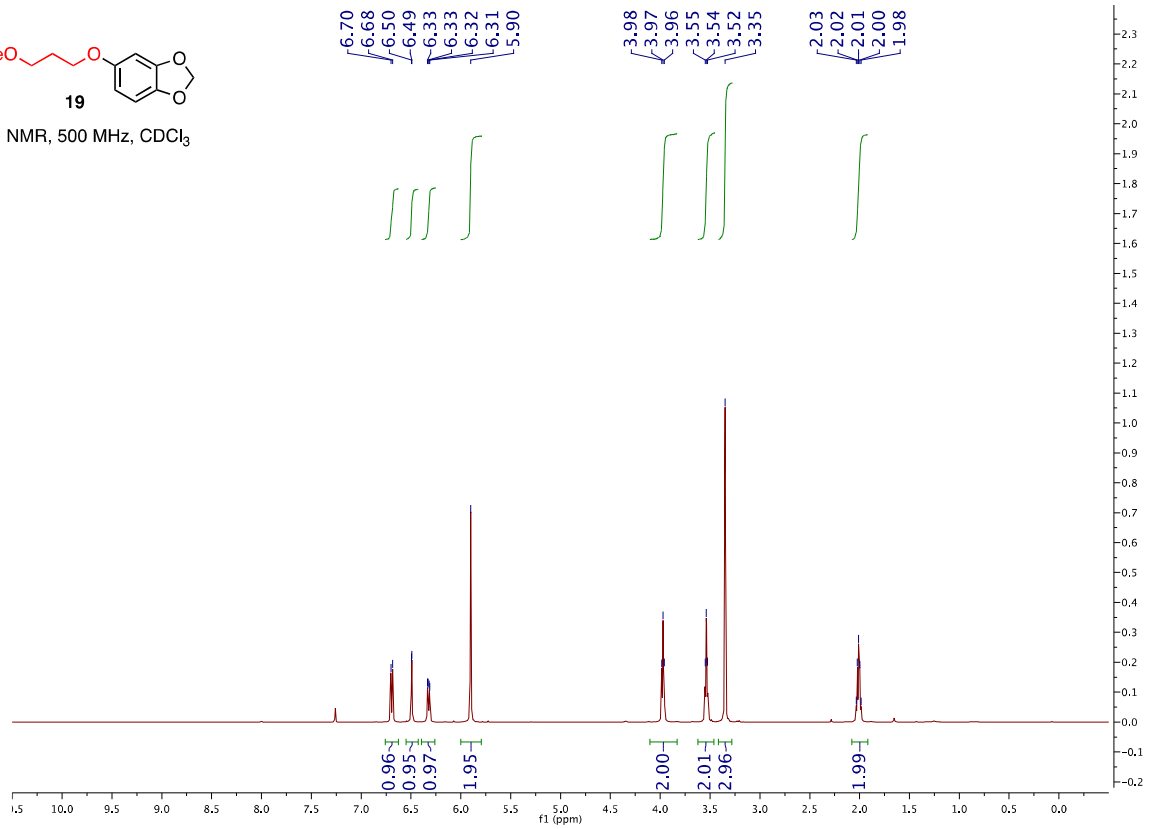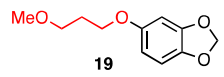

<sup>13</sup>C NMR, 126 MHz, CDCl<sub>3</sub>

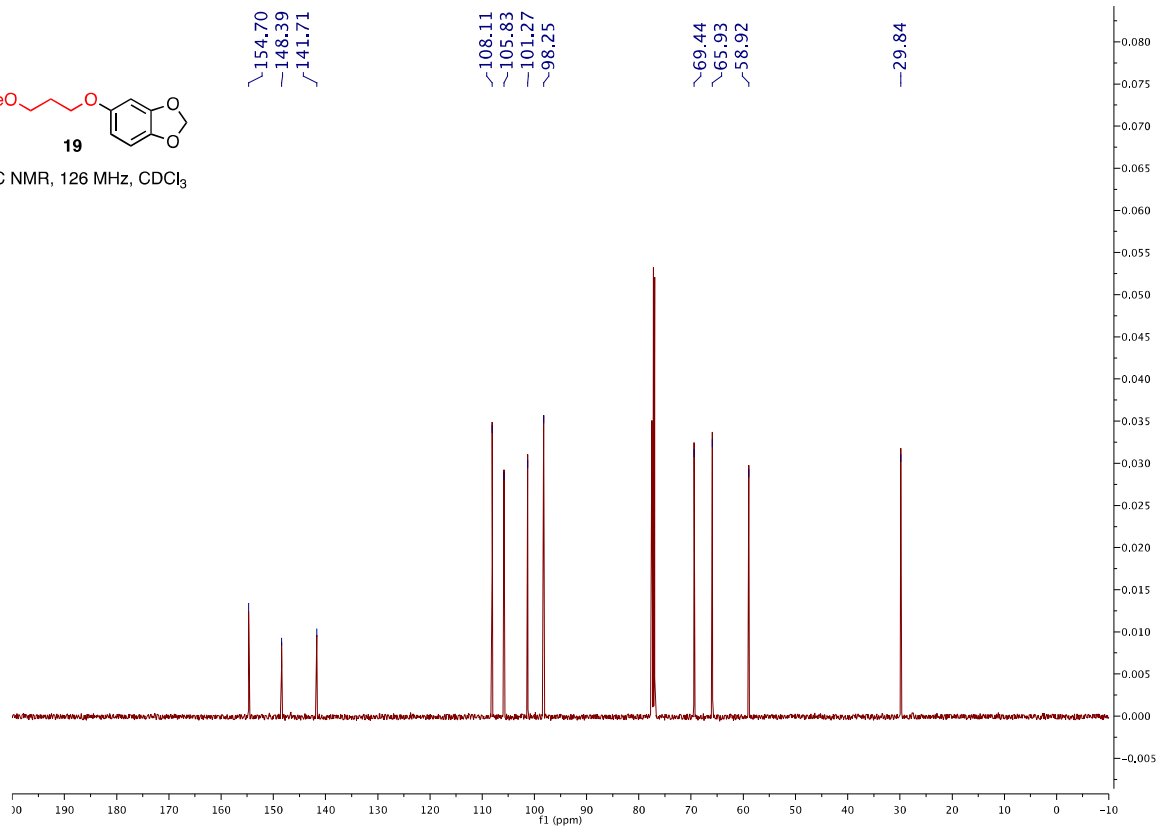

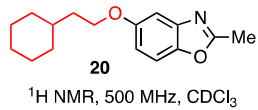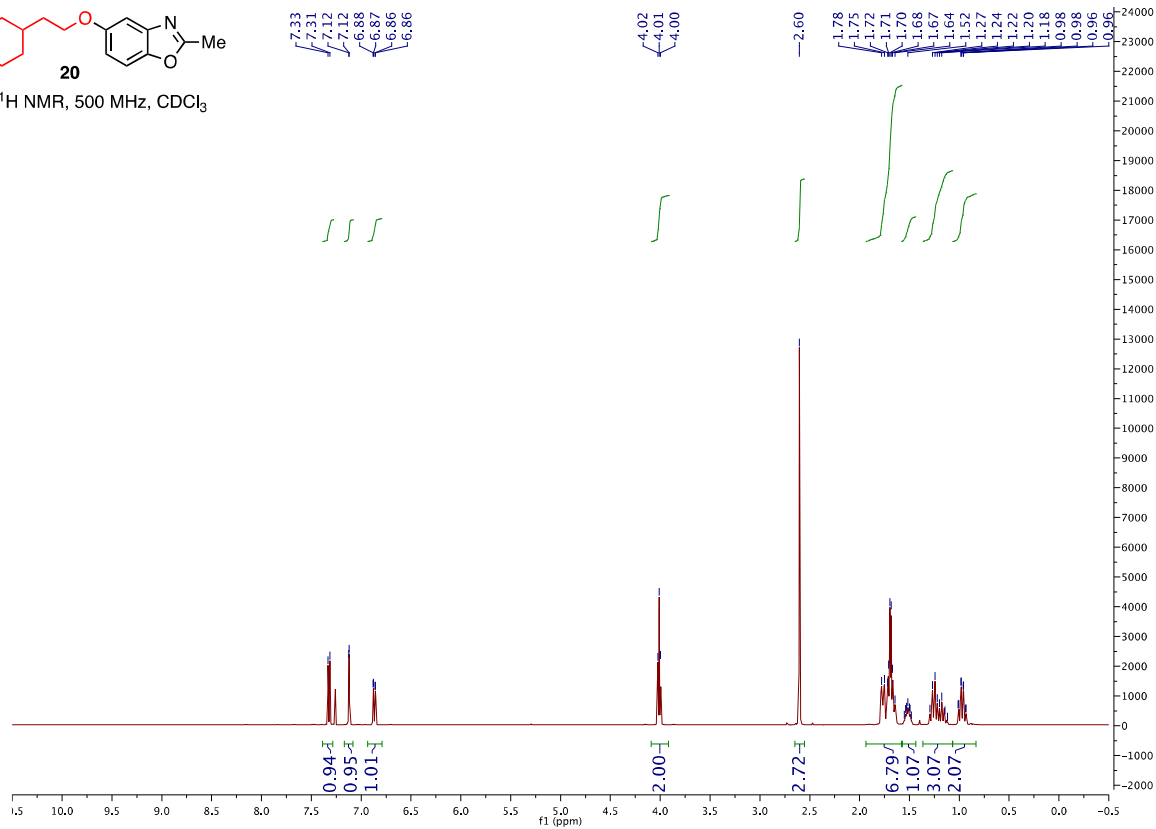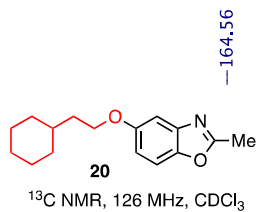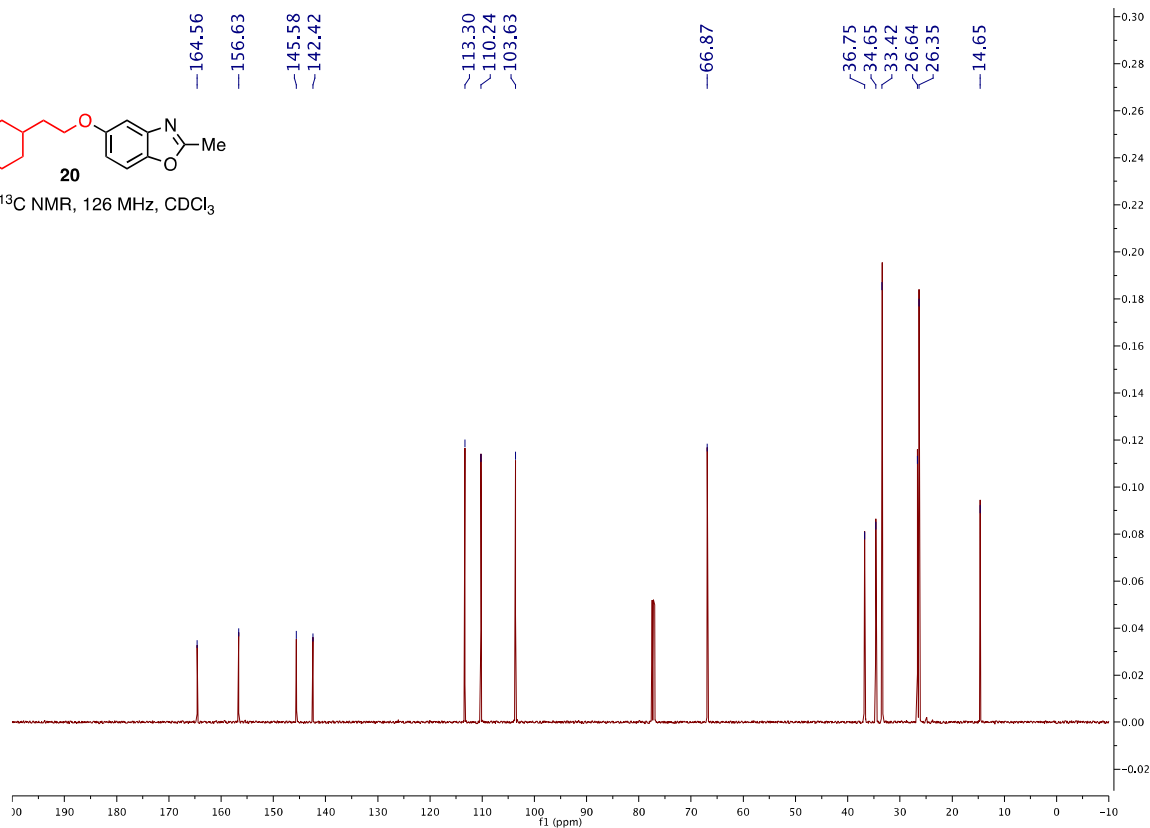

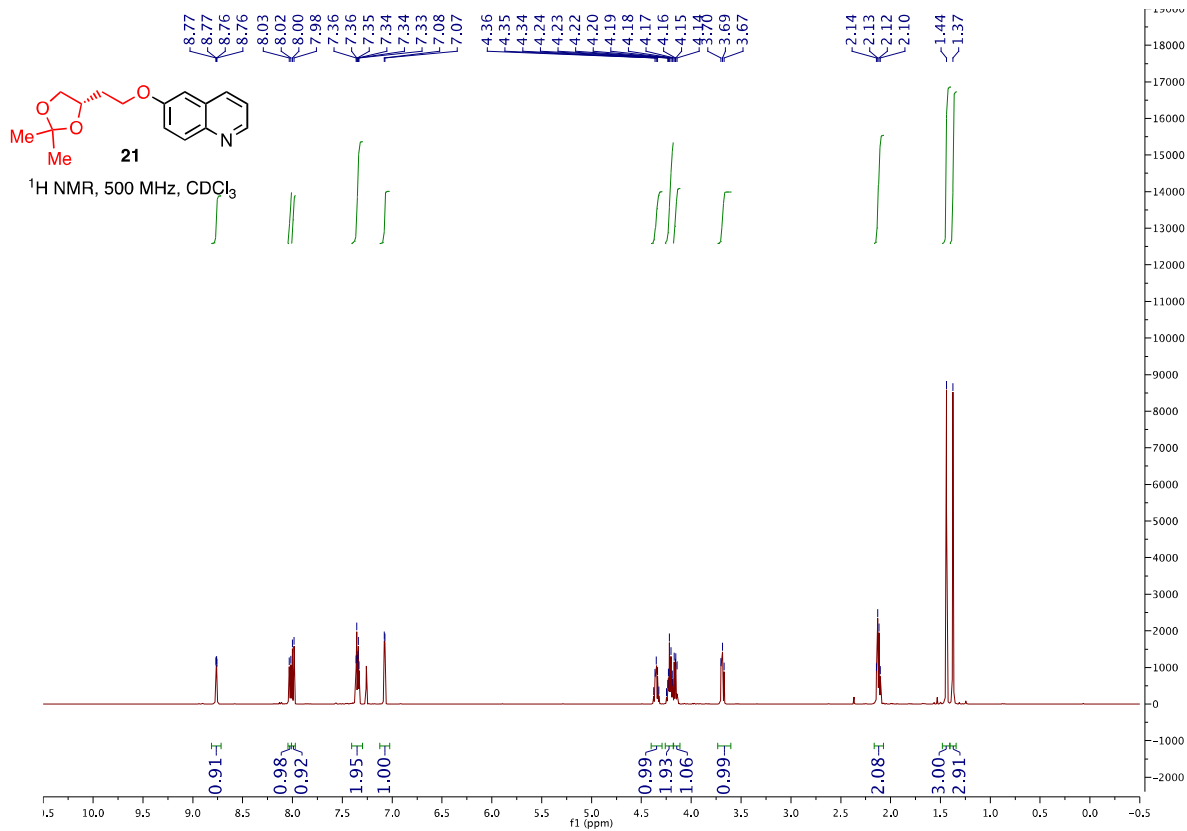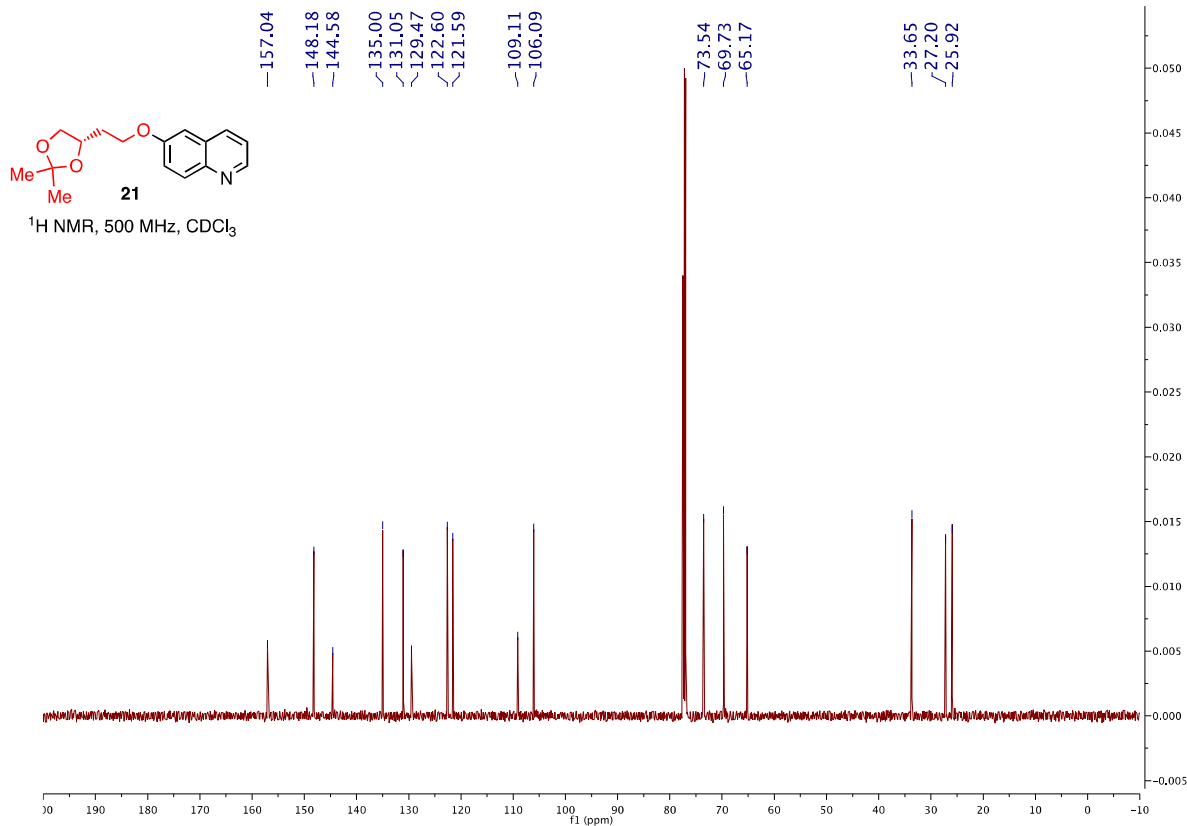

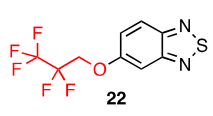

<sup>1</sup>H NMR, 500 MHz, CDCl<sub>3</sub>

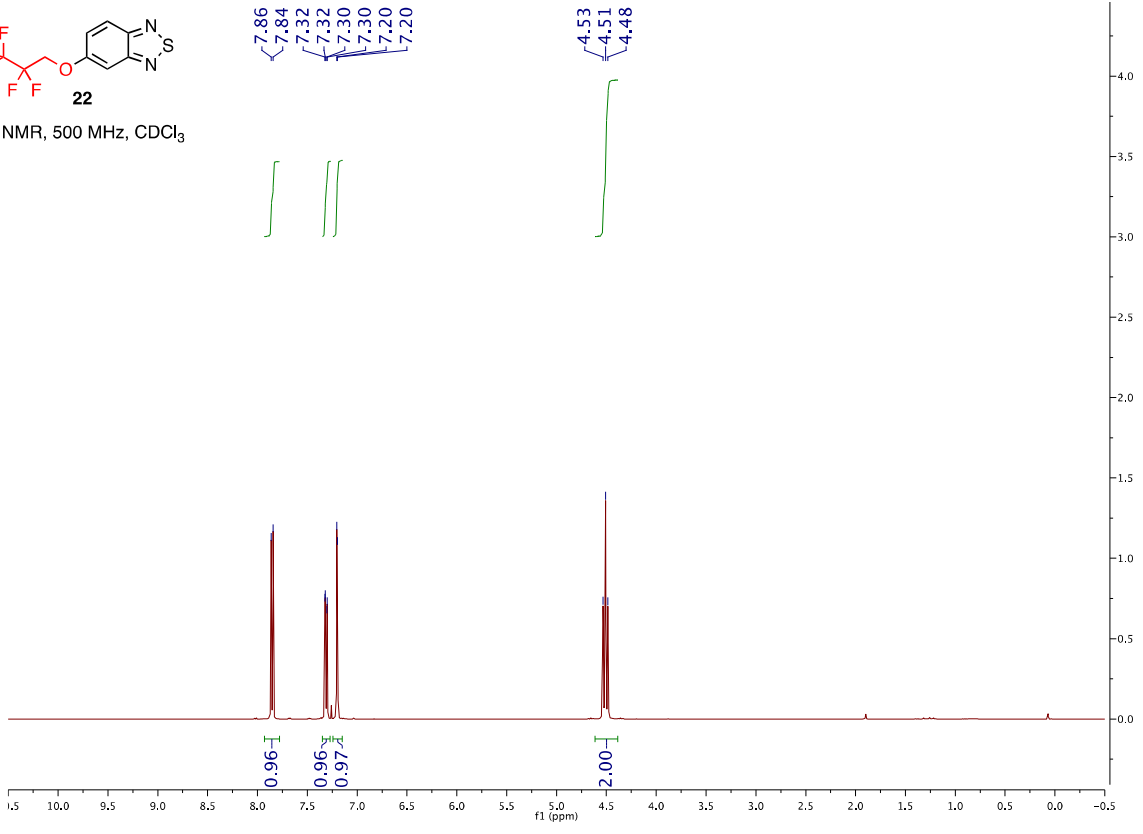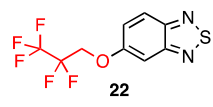

<sup>13</sup>C NMR, 126 MHz, CDCl<sub>3</sub>

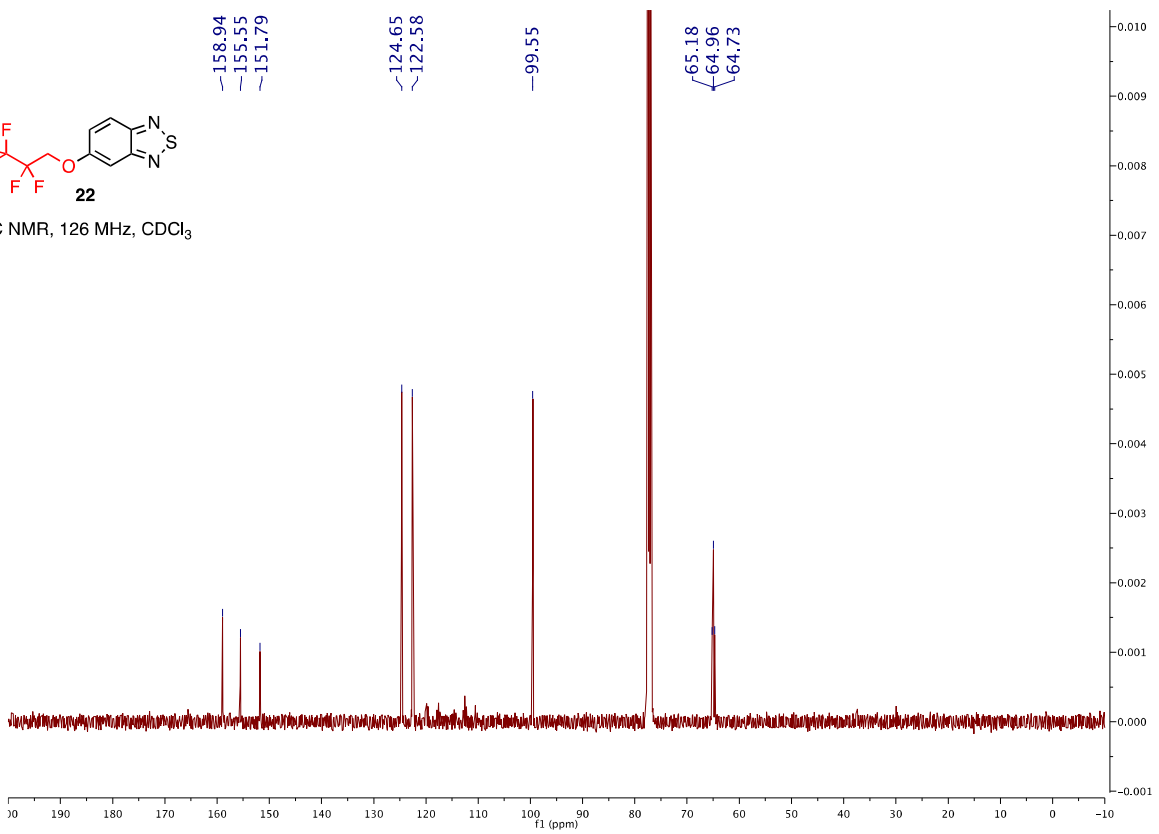

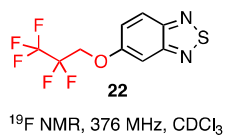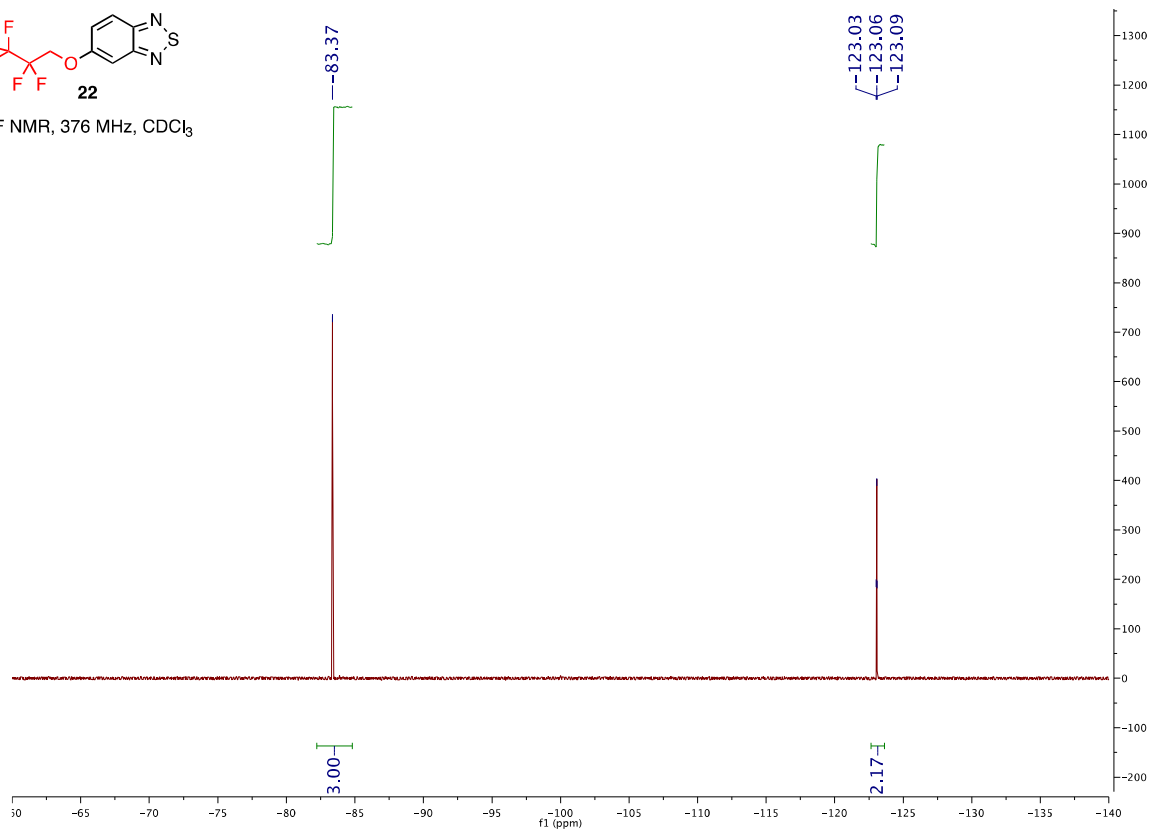

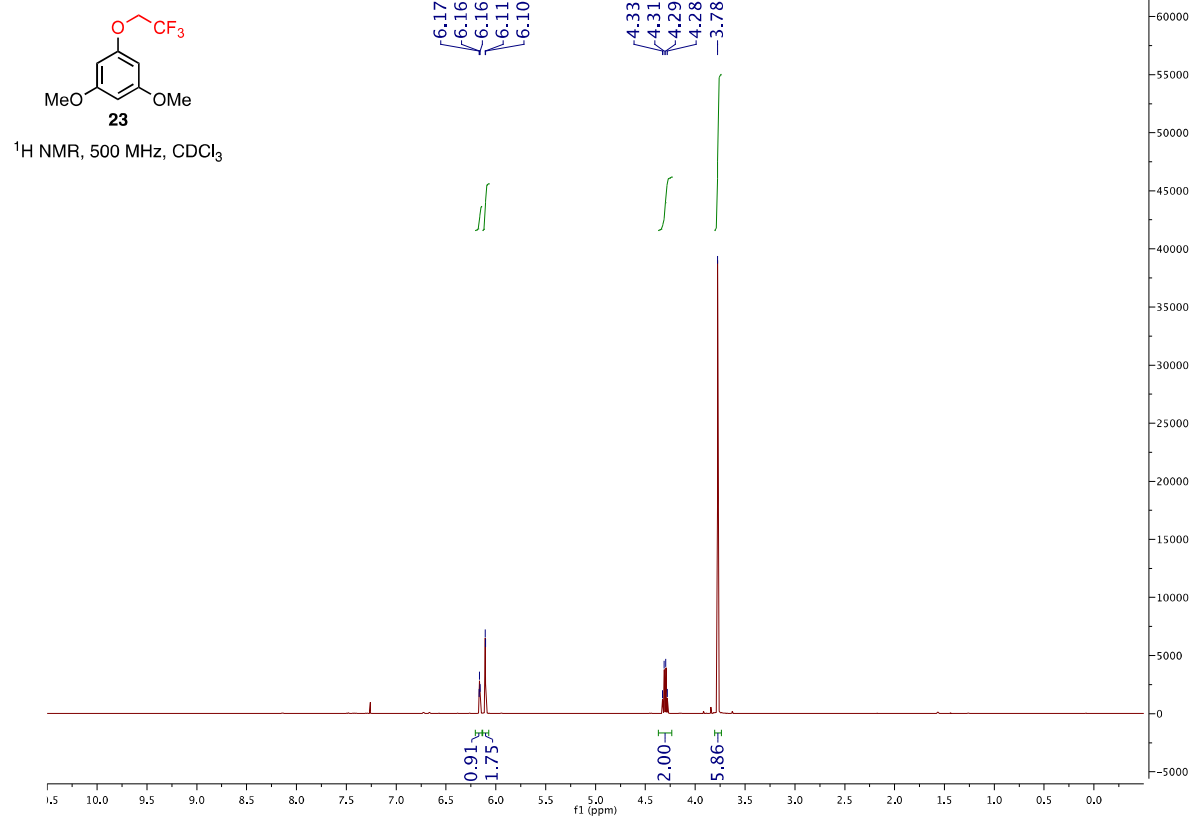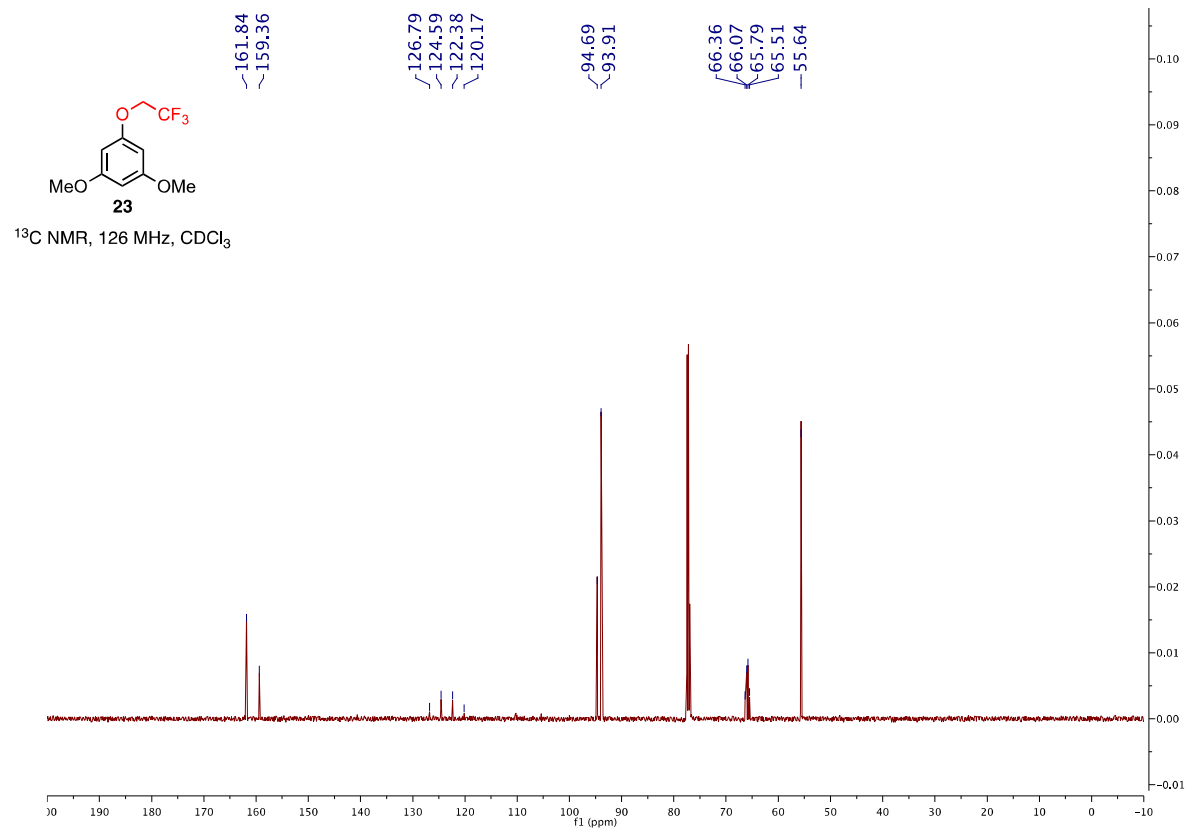

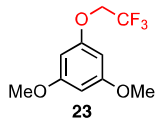

$^{19}\text{F}$  NMR, 282 MHz,  $\text{CDCl}_3$

--75.33

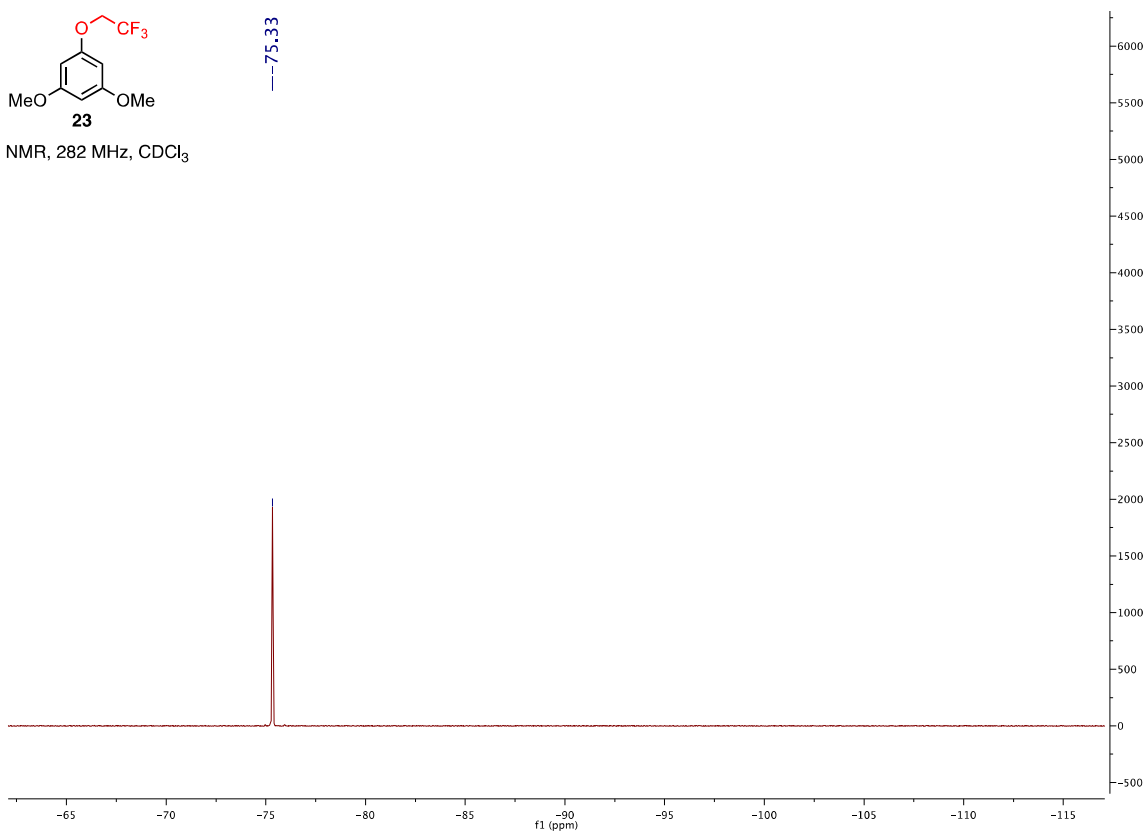

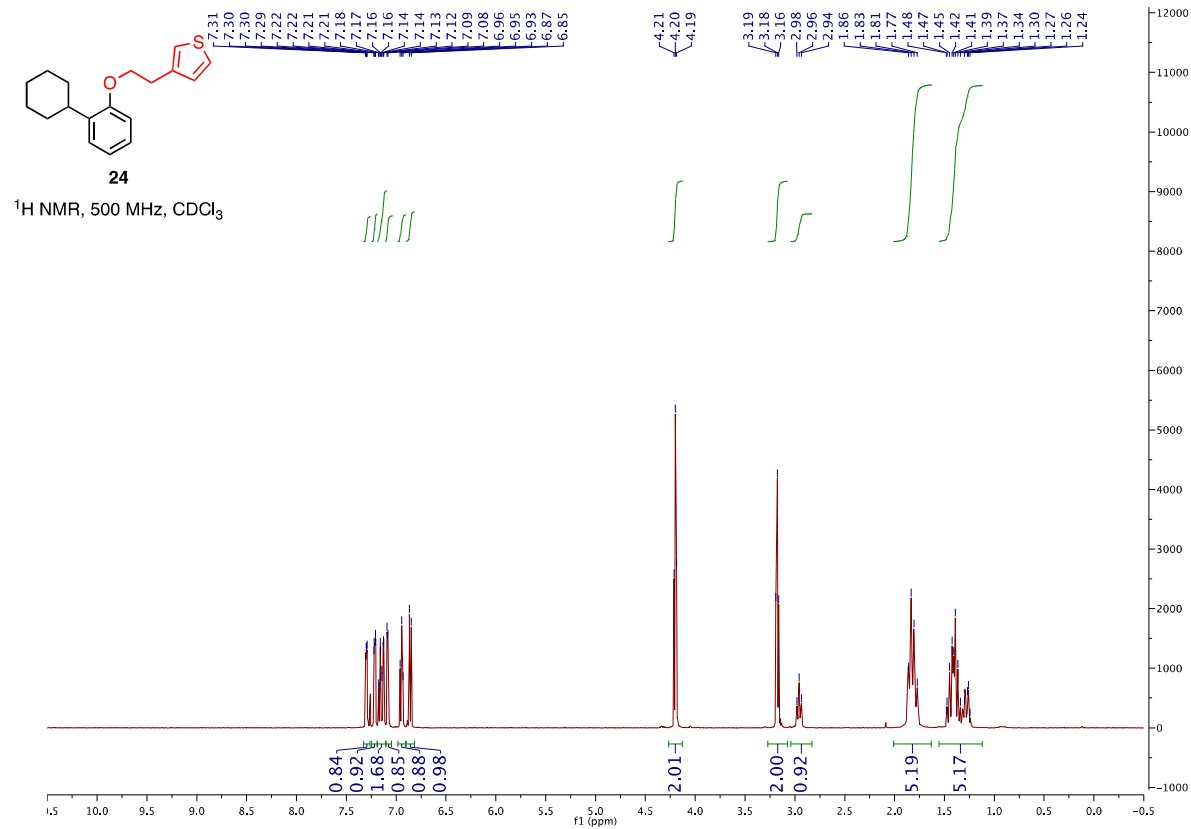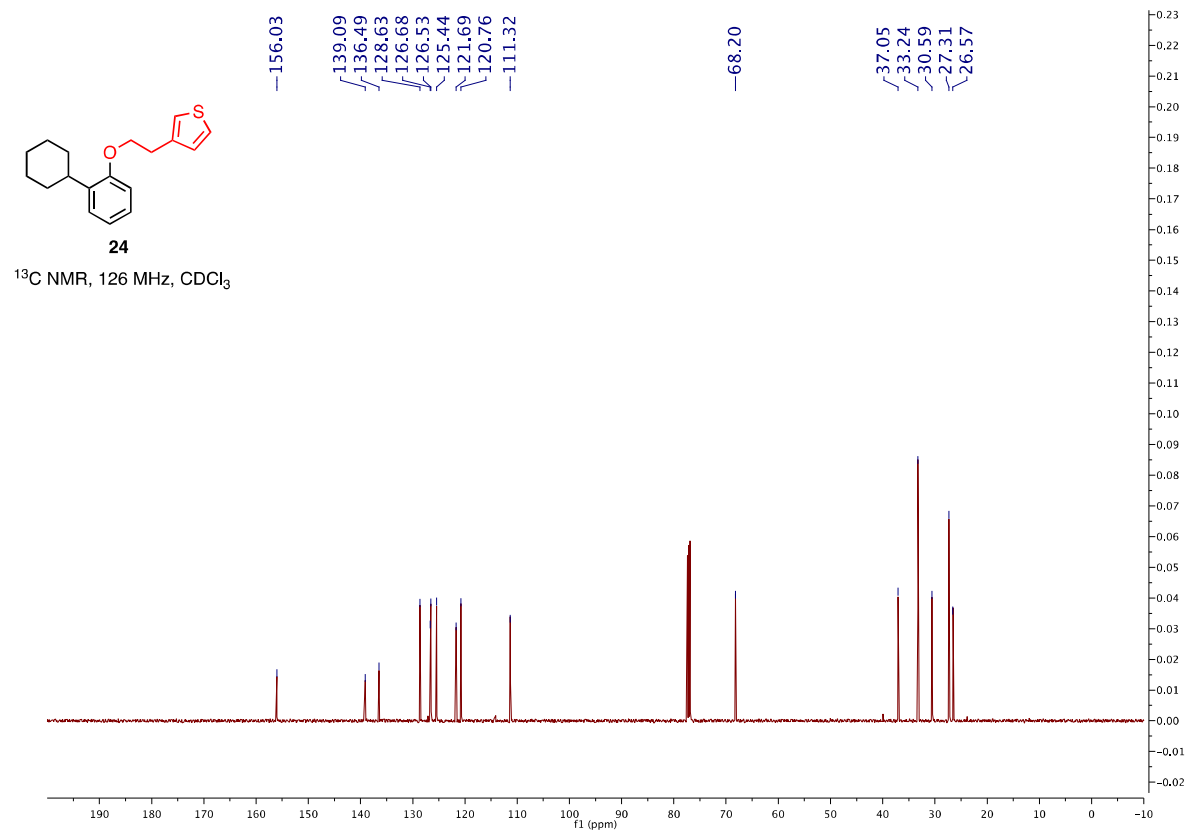



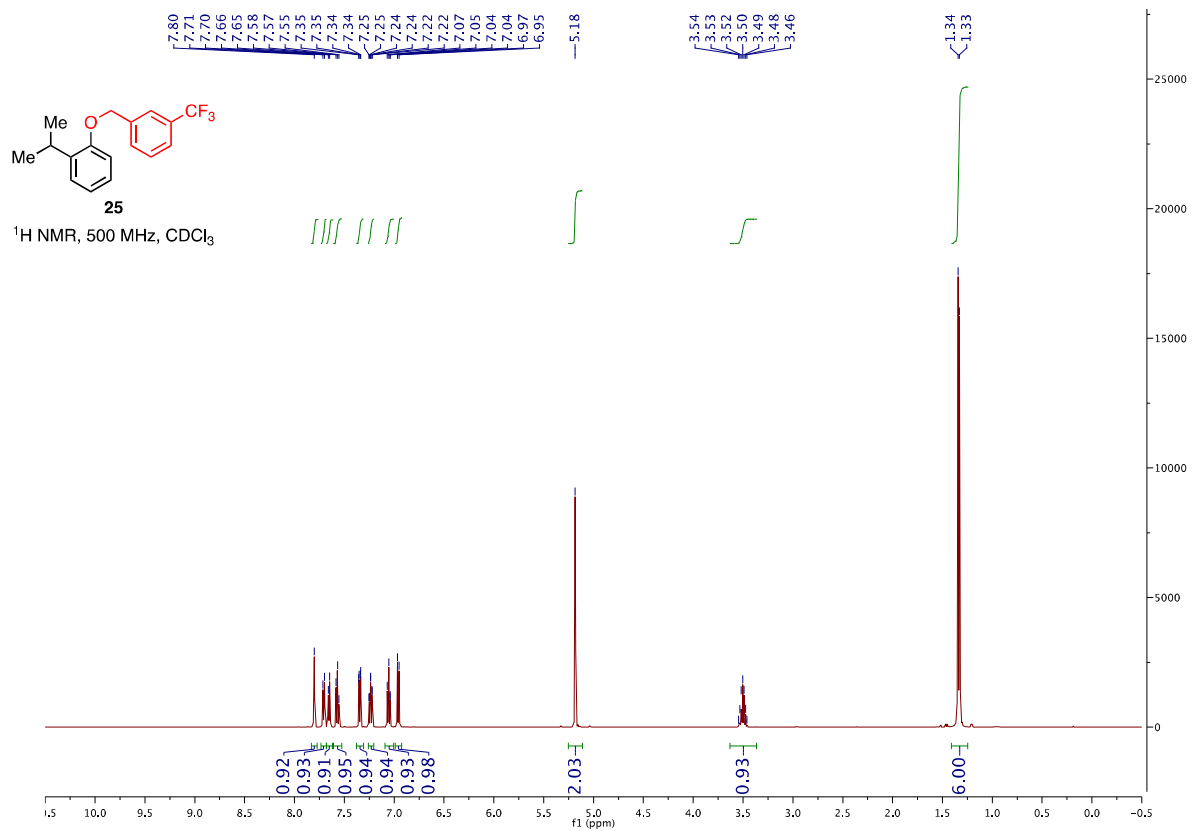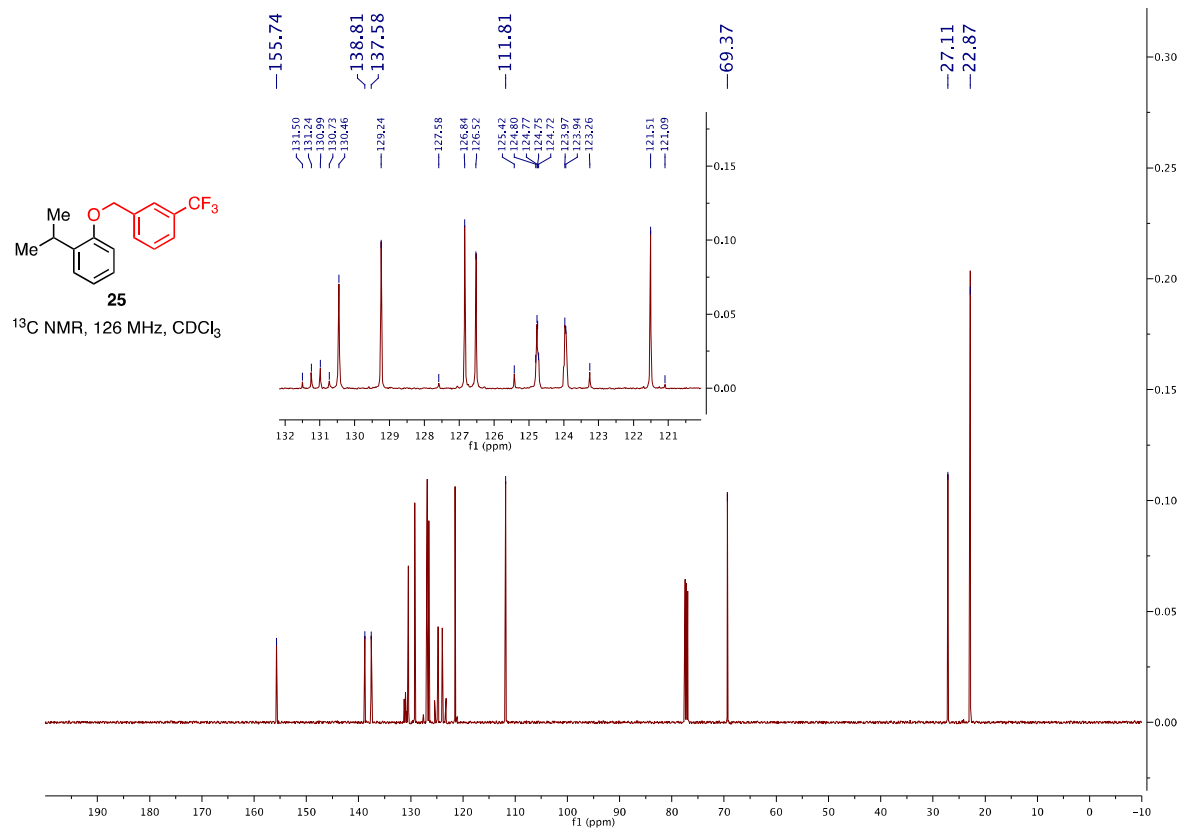

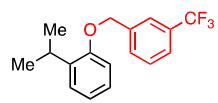

$^{19}\text{F}$  NMR, 282 MHz,  $\text{CDCl}_3$

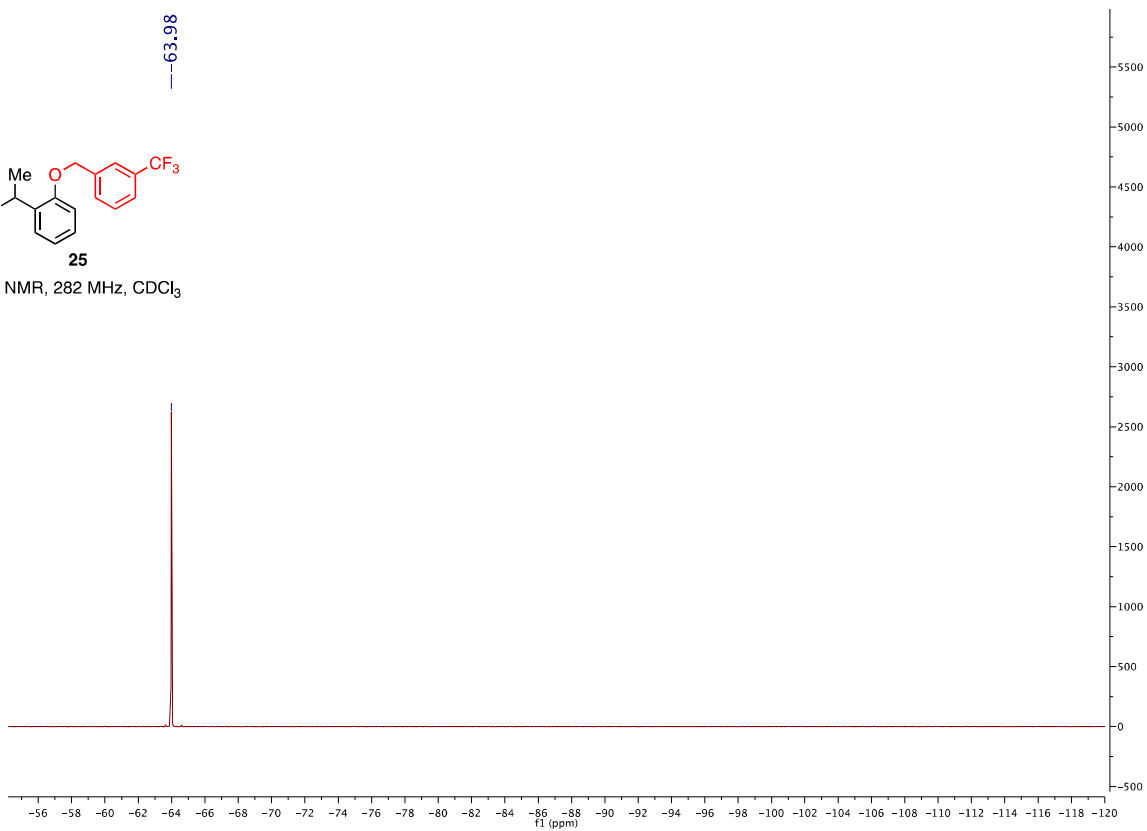

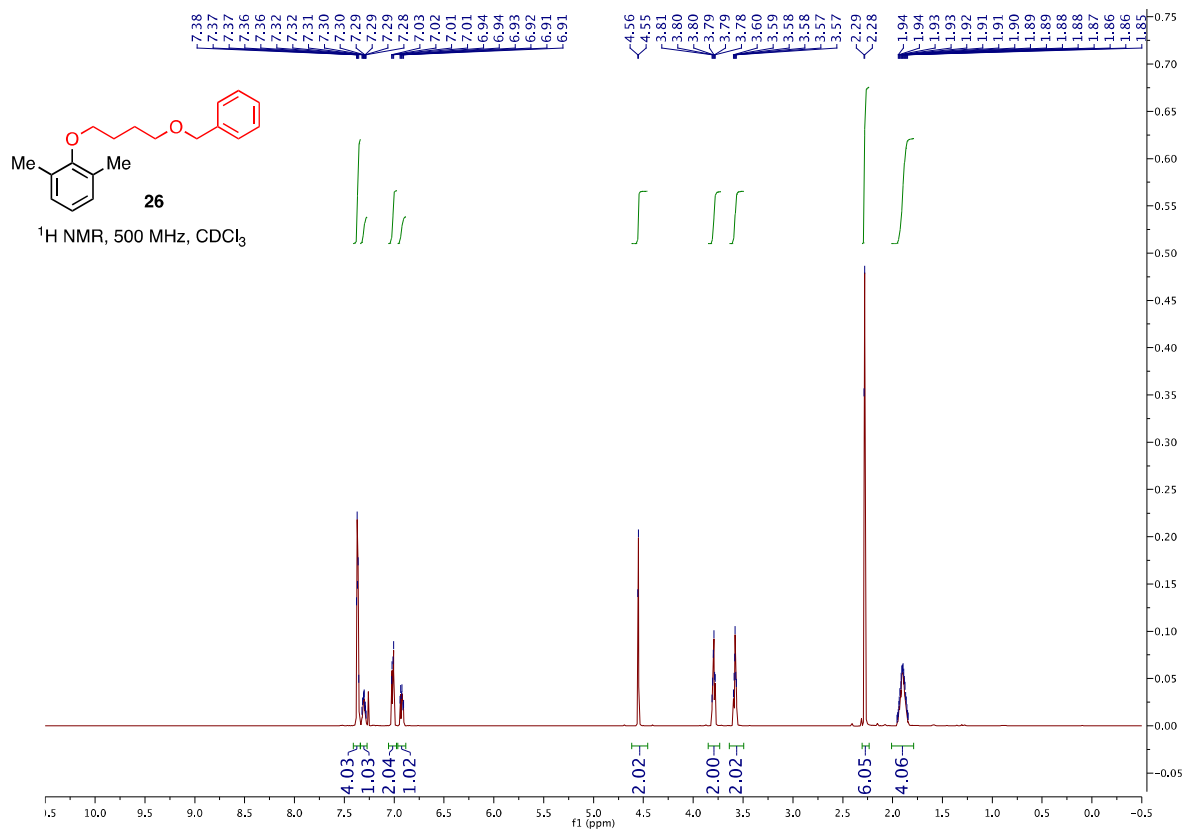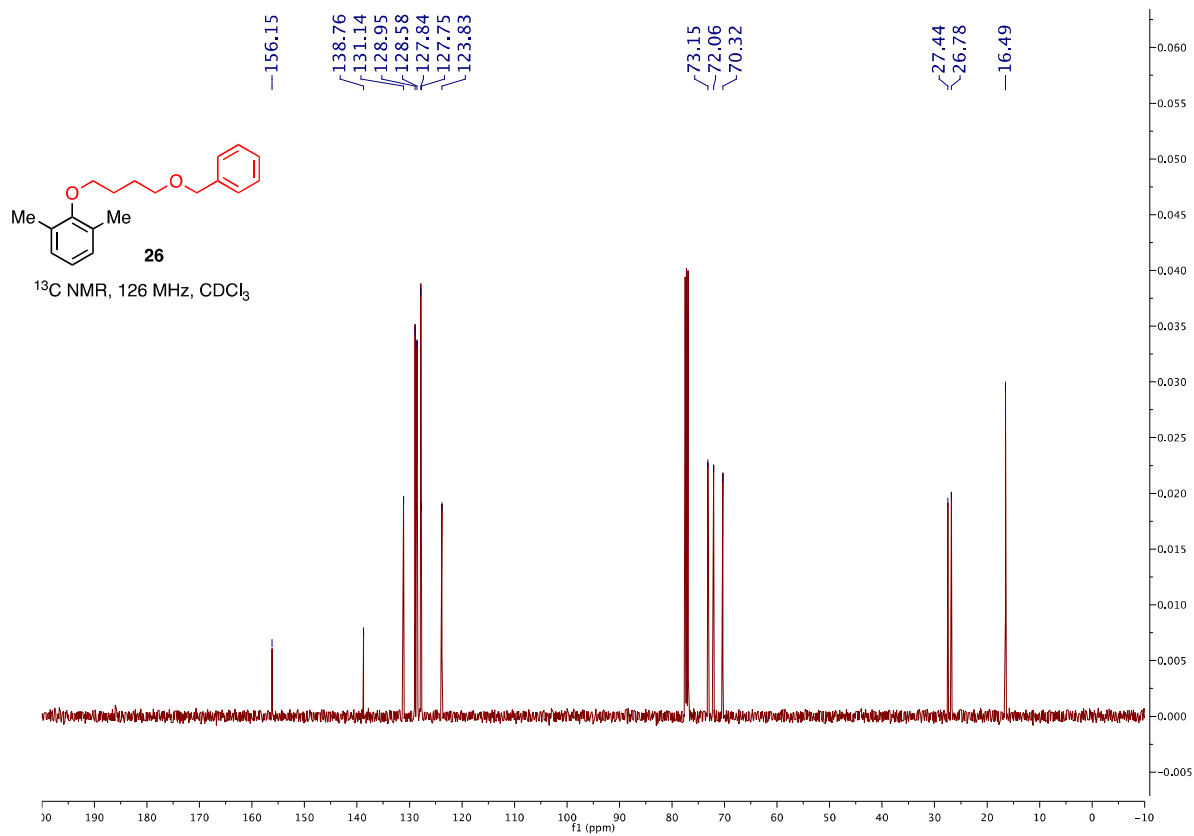

Supplement: NIHMS946250-supplement-supporting_information.pdf [file NIHMS946250-supplement-supporting_information.pdf]
